# Supplementary material for: 5′-Nor carbocyclic nucleosides: unusual nonnucleoside inhibitors of HIV-1 reverse transcriptase
Source: Royal Society of Chemistry journal article supplement (doi:10.1039/c3md00036b), 2013-01-01

## **5'-Nor carbocyclic nucleosides: unusual nonnucleoside inhibitors of HIV-1 reverse transcriptase**

**Elena S. Matyugina<sup>a</sup>, Vladimir T. Valuev-Elliston<sup>a</sup>, Denis A. Babkov<sup>b</sup>, Mikhail S. Novikov<sup>b</sup>, Alexander V. Ivanov<sup>a</sup>, Sergey N. Kochetkov<sup>a</sup>, Jan Balzarini<sup>c</sup>, Katherine L. Seley-Radtke<sup>d</sup> and Anastasia L. Khandazinskaya<sup>a</sup>**

<sup>a</sup>Engelhardt Institute of Molecular Biology RAS, Vavilova 32, 119991 Moscow, Russia

<sup>b</sup>Volgograd State Medicinal University, Paversushikh Bortcov Sq., 1, 400131 Volgograd Russia

<sup>c</sup>Rega Institute for Medical Research, K.U. Leuven, Minderbroedersstraat 10, B-3000 Leuven, Belgium

<sup>d</sup>University of Maryland, Baltimore County, 1000 Hilltop Circle, Baltimore, MD USA

[kseley@umbc.edu](mailto:kseley@umbc.edu)

## Contents

|                                                                                         |     |
|-----------------------------------------------------------------------------------------|-----|
| $^1\text{H}$ NMR and $^{13}\text{C}$ NMR spectra                                        | S3  |
| Figure S1. $^1\text{H}$ NMR spectrum of compound 1 (in $\text{CDCl}_3$ at 400 MHz)      | S3  |
| Figure S2. $^{13}\text{C}$ NMR spectrum of compound 1 (in $\text{CDCl}_3$ at 100 MHz)   | S4  |
| Figure S3. $^1\text{H}$ NMR spectrum of compound 2 (in $\text{CDCl}_3$ at 400 MHz)      | S5  |
| Figure S4. $^{13}\text{C}$ NMR spectrum of compound 2 (in $\text{CDCl}_3$ at 100 MHz)   | S6  |
| Figure S5. $^1\text{H}$ NMR spectrum of compound 3 (in $\text{CDCl}_3$ at 400 MHz)      | S7  |
| Figure S6. $^{13}\text{C}$ NMR spectrum of compound 3 (in $\text{CDCl}_3$ at 100 MHz)   | S8  |
| Figure S7. $^1\text{H}$ NMR spectrum of compound 4 (in $\text{CDCl}_3$ at 400 MHz)      | S9  |
| Figure S8. $^{13}\text{C}$ NMR spectrum of compound 4 (in $\text{CDCl}_3$ at 100 MHz)   | S10 |
| Figure S9. $^1\text{H}$ NMR spectrum of compound 5 (in $\text{CDCl}_3$ at 400 MHz)      | S11 |
| Figure S10. $^{13}\text{C}$ NMR spectrum of compound 5 (in $\text{CDCl}_3$ at 100 MHz)  | S12 |
| Figure S11. $^1\text{H}$ NMR spectrum of compound 6 (in $\text{CDCl}_3$ at 400 MHz)     | S13 |
| Figure S12. $^{13}\text{C}$ NMR spectrum of compound 6 (in $\text{CDCl}_3$ at 100 MHz)  | S14 |
| Figure S13. $^1\text{H}$ NMR spectrum of compound 7 (in $\text{CDCl}_3$ at 400 MHz)     | S15 |
| Figure S14. $^{13}\text{C}$ NMR spectrum of compound 7 (in $\text{CDCl}_3$ at 100 MHz)  | S16 |
| Figure S15. $^1\text{H}$ NMR spectrum of compound 8 (in $\text{CDCl}_3$ at 400 MHz)     | S17 |
| Figure S16. $^{13}\text{C}$ NMR spectrum of compound 8 (in $\text{CDCl}_3$ at 100 MHz)  | S18 |
| Figure S17. $^1\text{H}$ NMR spectrum of compound 9 (in $\text{CDCl}_3$ at 400 MHz)     | S19 |
| Figure S18. $^{13}\text{C}$ NMR spectrum of compound 9 (in $\text{CDCl}_3$ at 100 MHz)  | S20 |
| Figure S19. $^1\text{H}$ NMR spectrum of compound 10 (in $\text{CDCl}_3$ at 400 MHz)    | S21 |
| Figure S20. $^{13}\text{C}$ NMR spectrum of compound 10 (in $\text{CDCl}_3$ at 100 MHz) | S22 |
| Figure S21. $^1\text{H}$ NMR spectrum of compound 13 (in $\text{CDCl}_3$ at 400 MHz)    | S23 |
| Figure S22. $^{13}\text{C}$ NMR spectrum of compound 13 (in $\text{CDCl}_3$ at 100 MHz) | S24 |
| Figure S23. $^1\text{H}$ NMR spectrum of compound 14 (in $\text{CDCl}_3$ at 400 MHz)    | S25 |
| Figure S24. $^{13}\text{C}$ NMR spectrum of compound 14 (in $\text{CDCl}_3$ at 100 MHz) | S26 |
| Figure S25. $^1\text{H}$ NMR spectrum of compound 15 (in $\text{CDCl}_3$ at 400 MHz)    | S27 |
| Figure S26. $^{13}\text{C}$ NMR spectrum of compound 15 (in $\text{CDCl}_3$ at 100 MHz) | S28 |

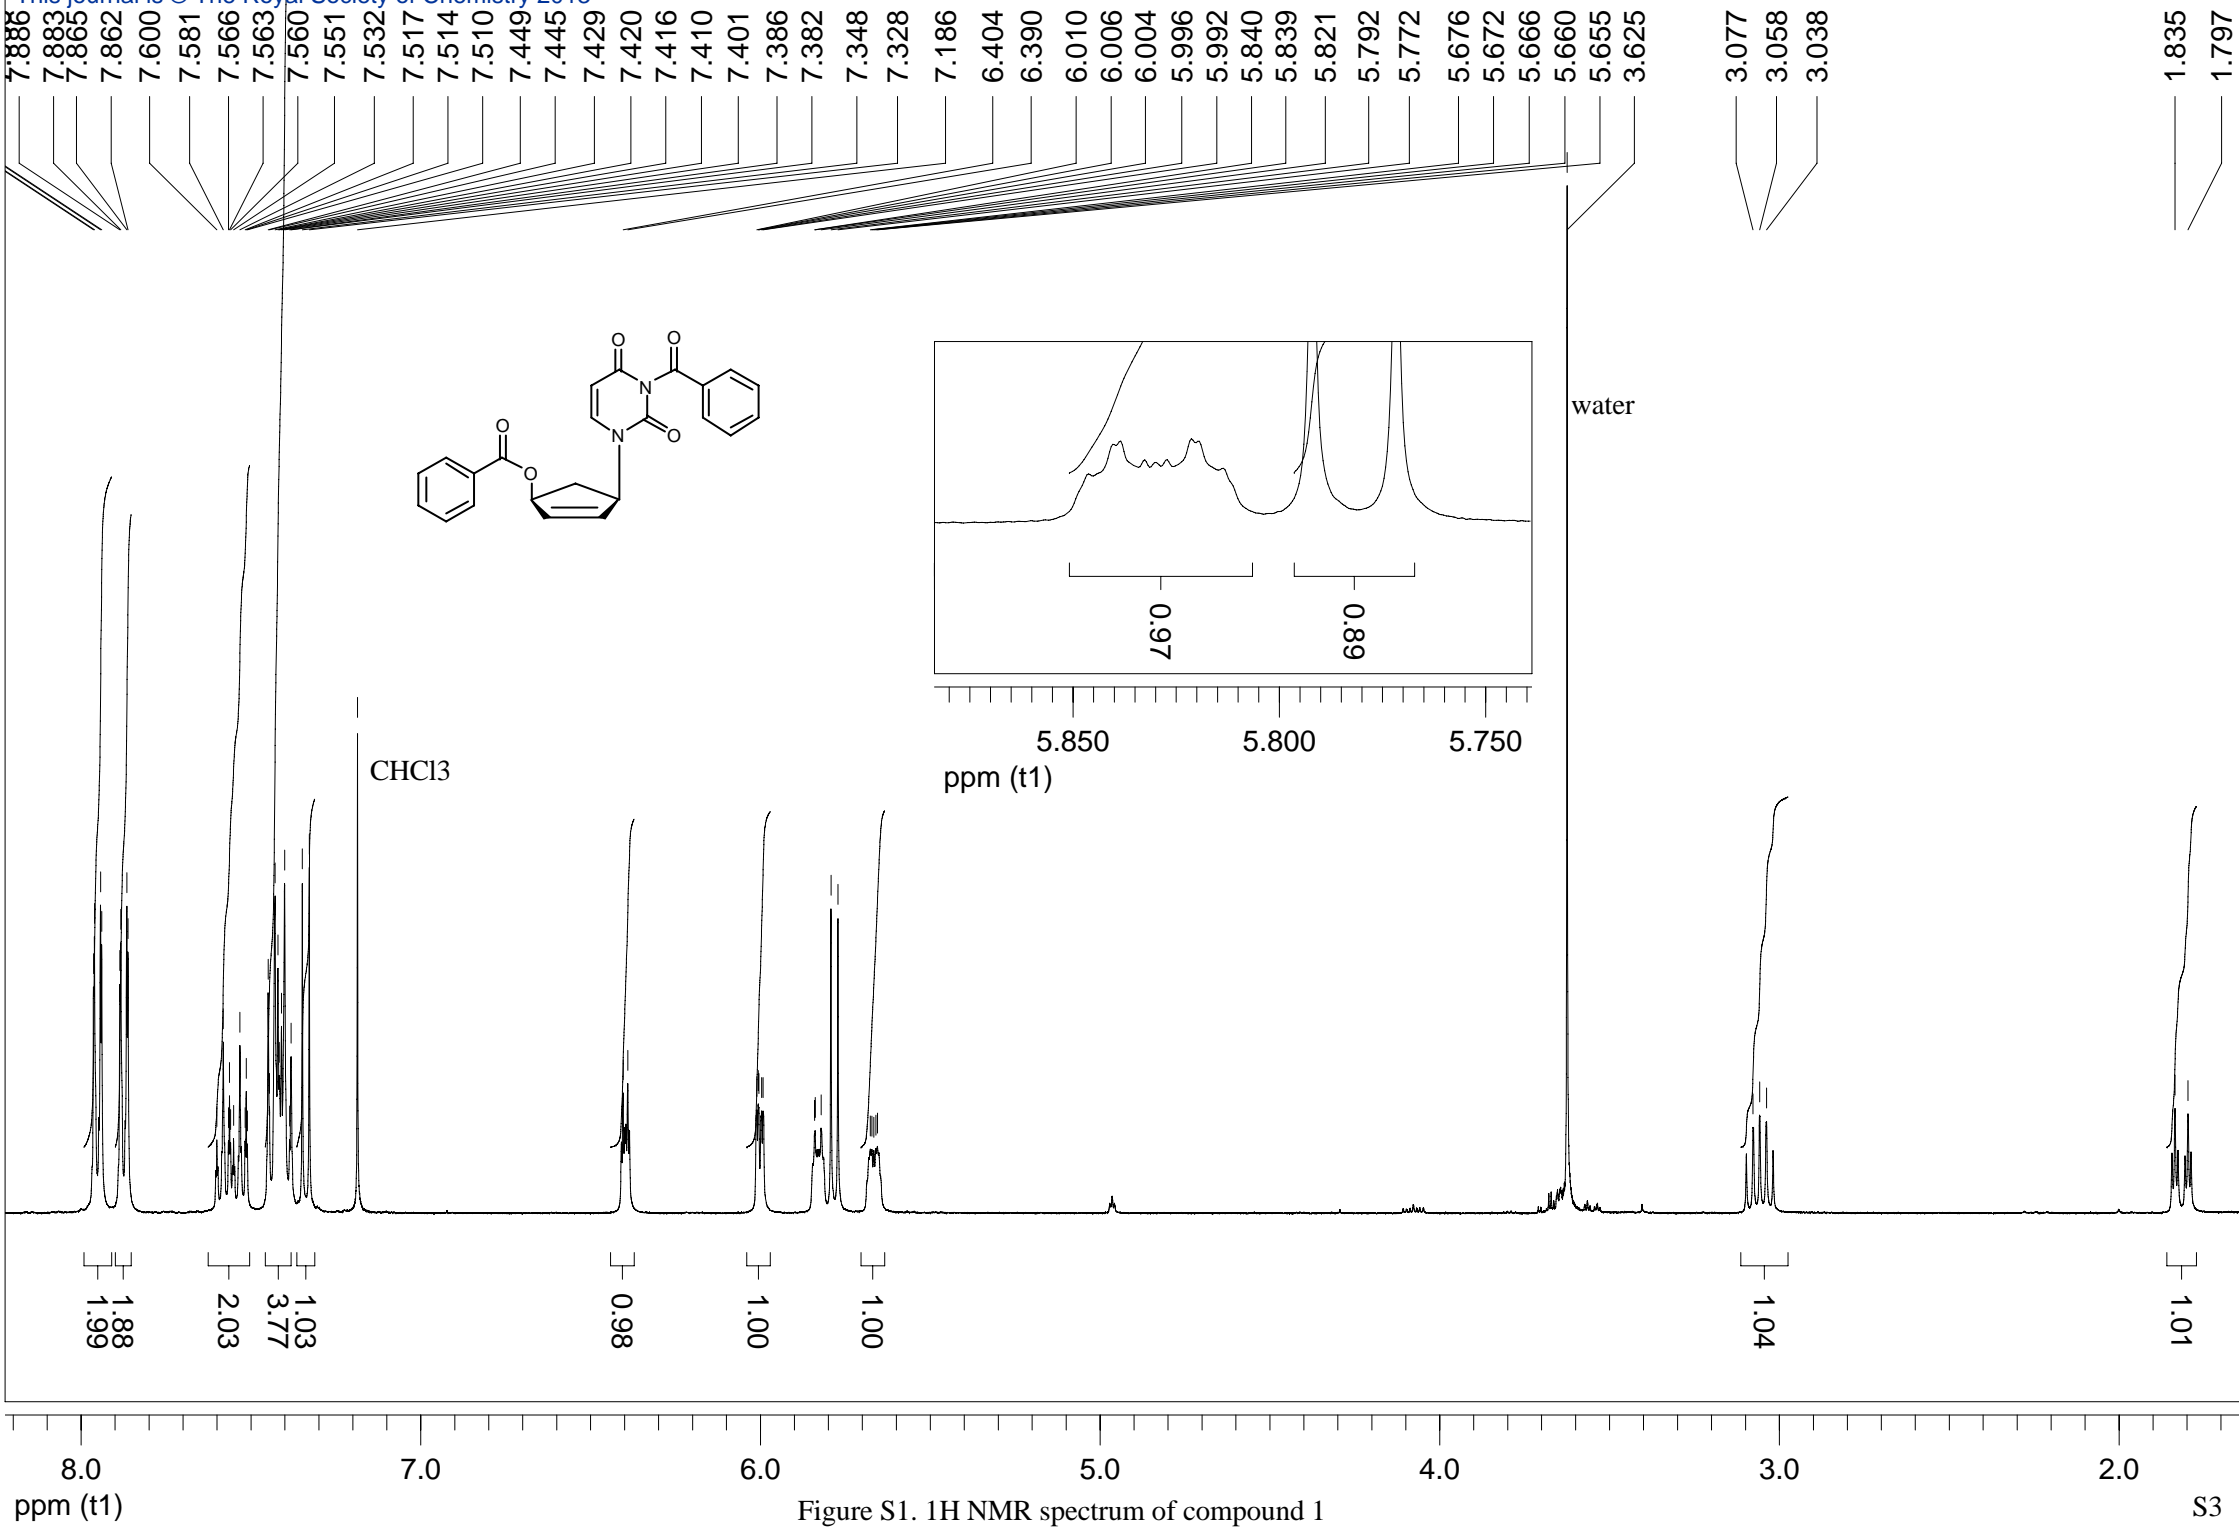

Figure S1. <sup>1</sup>H NMR spectrum of compound 1

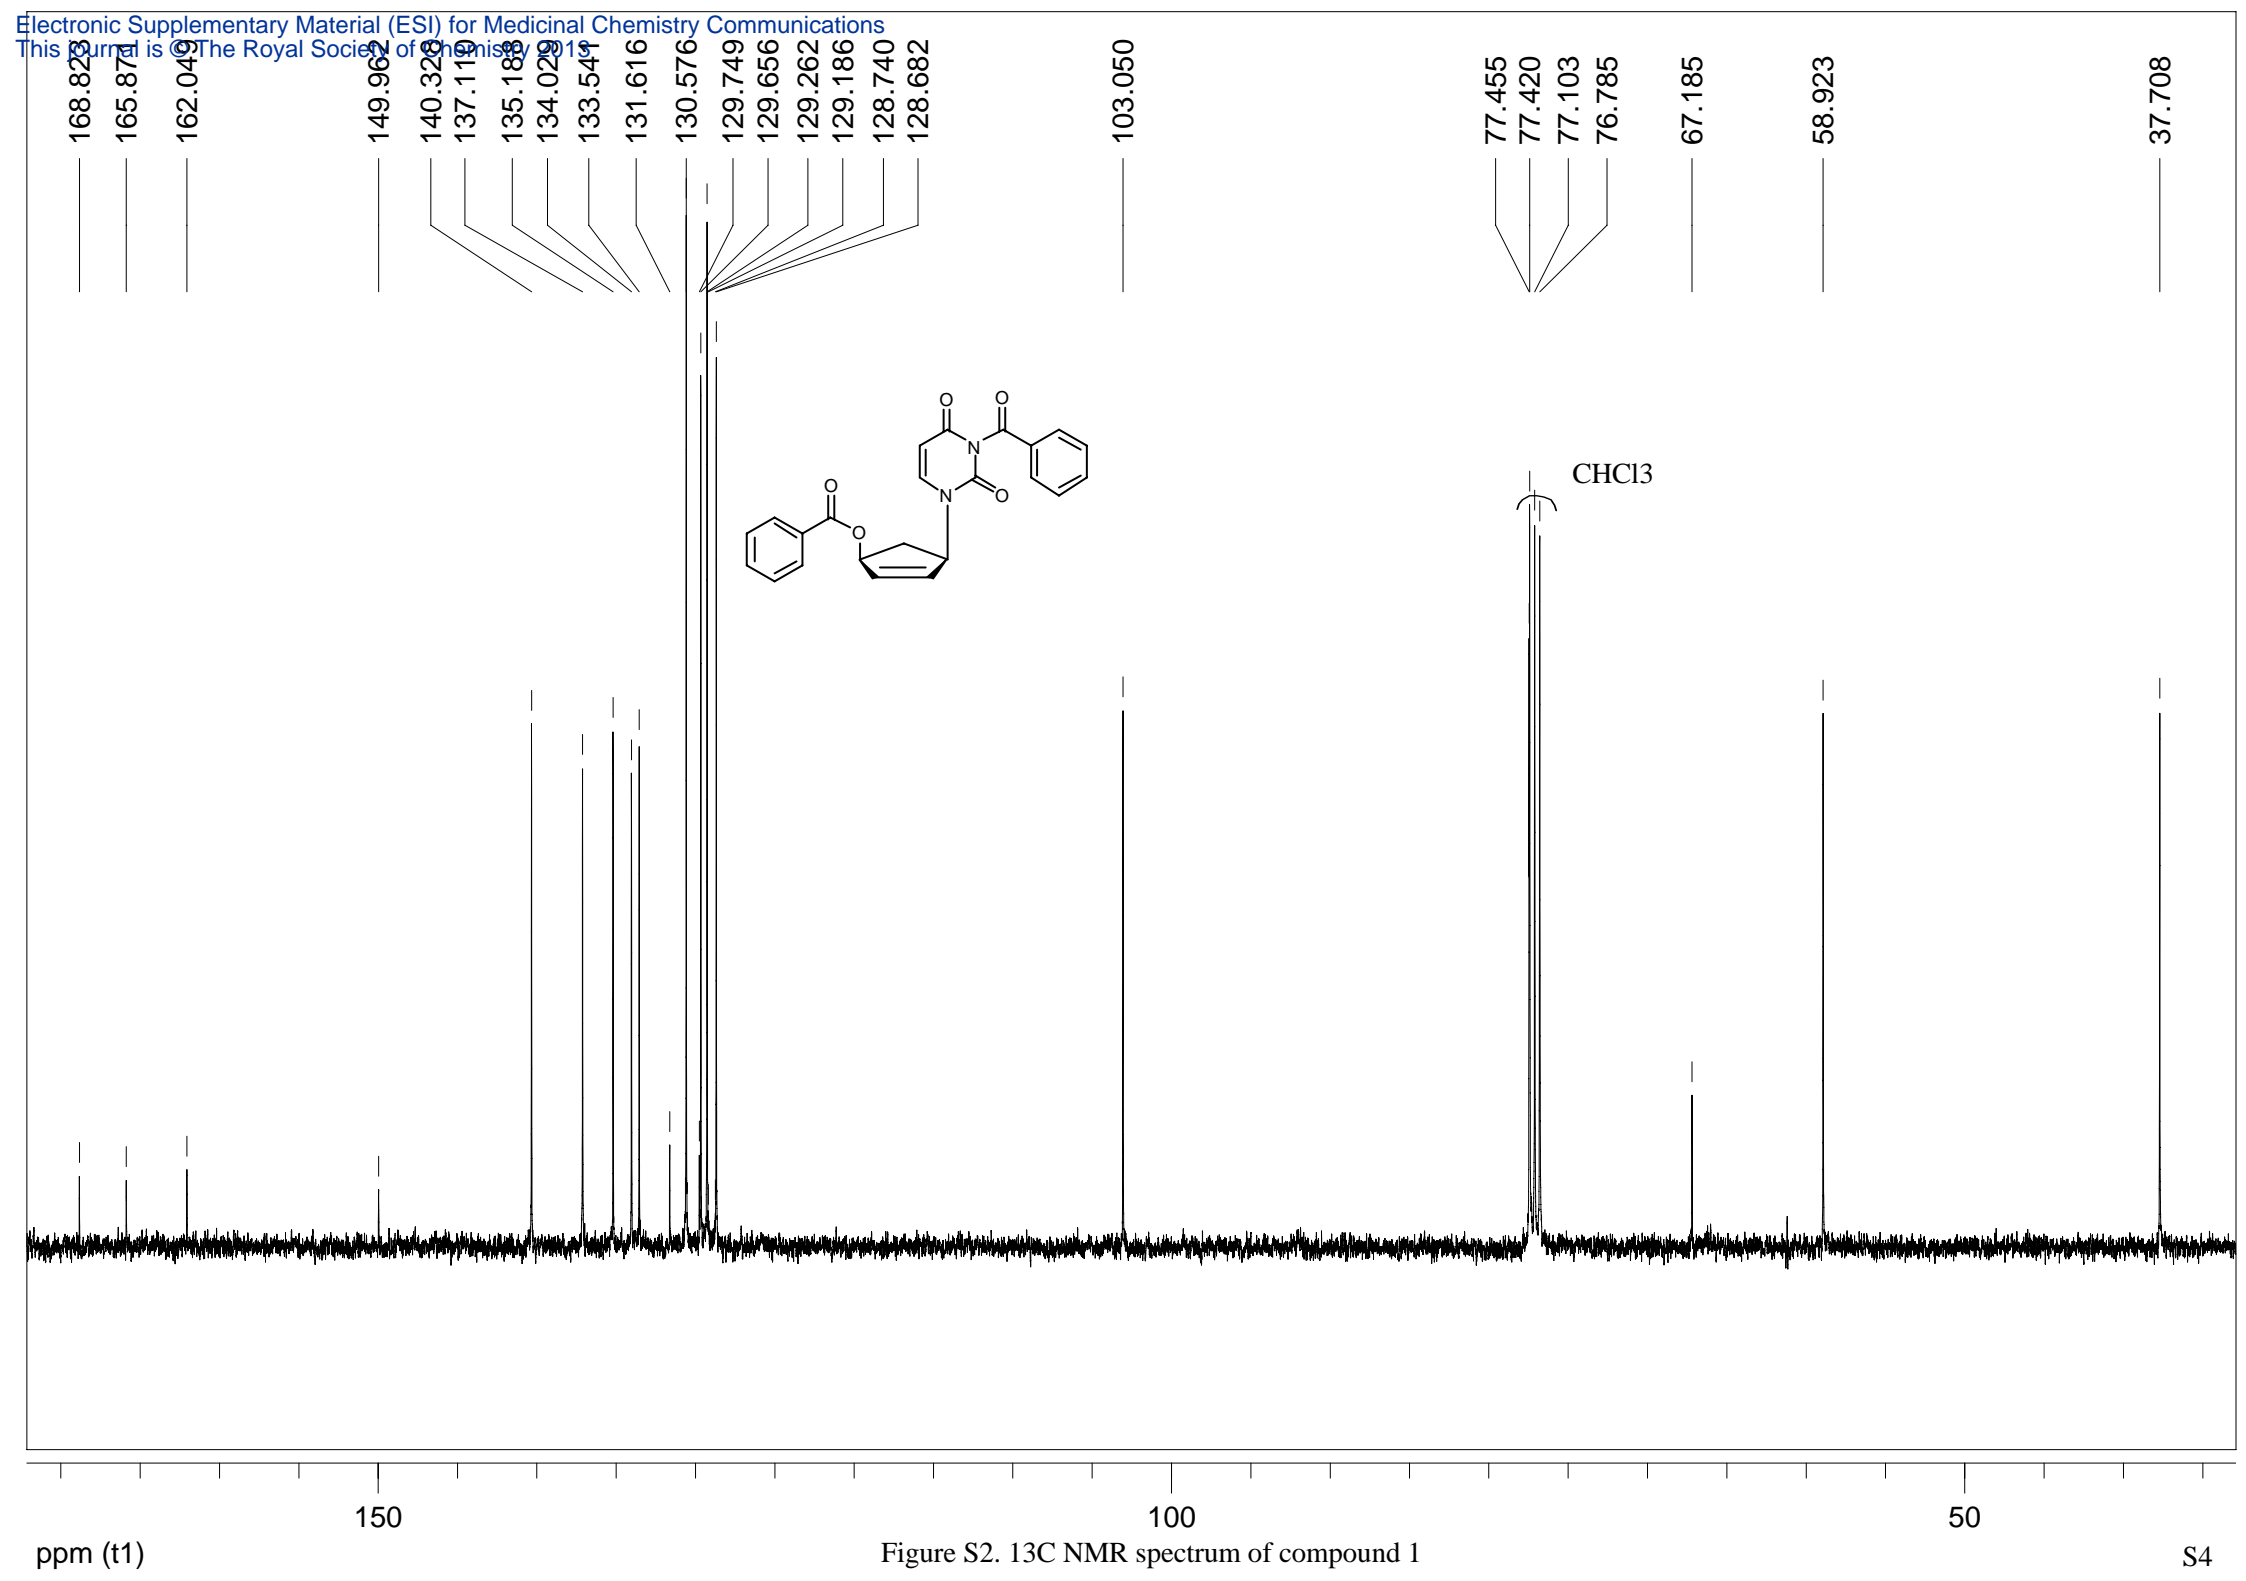

Figure S2. <sup>13</sup>C NMR spectrum of compound 1

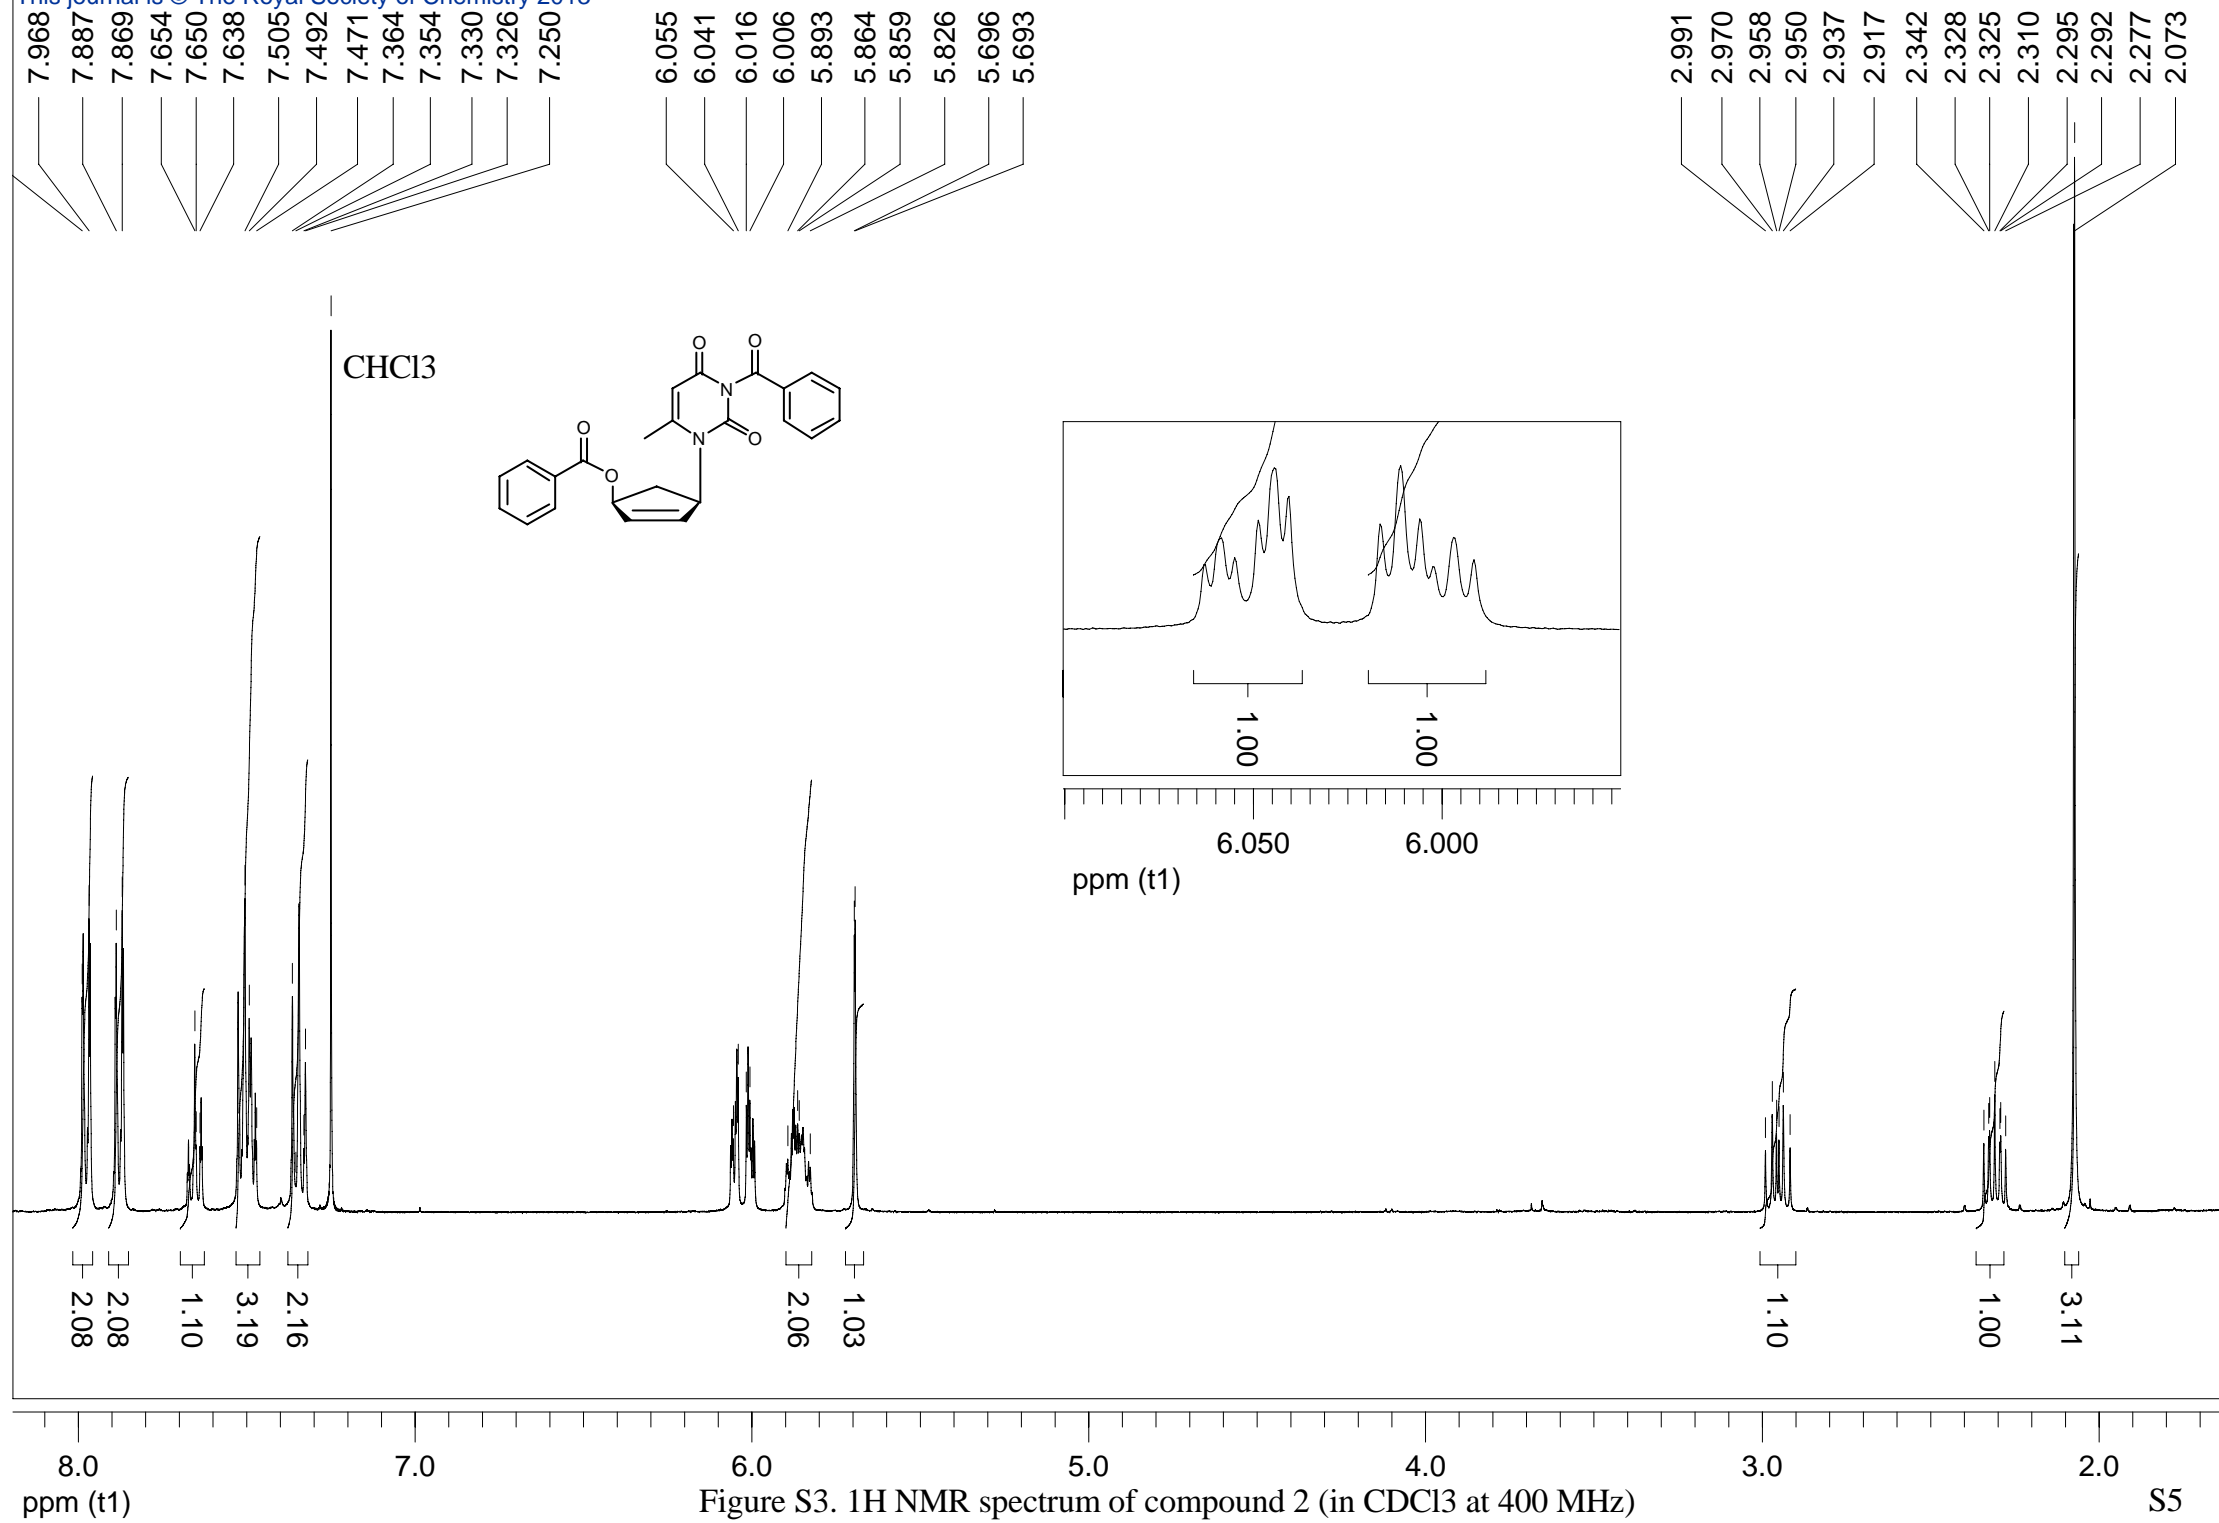

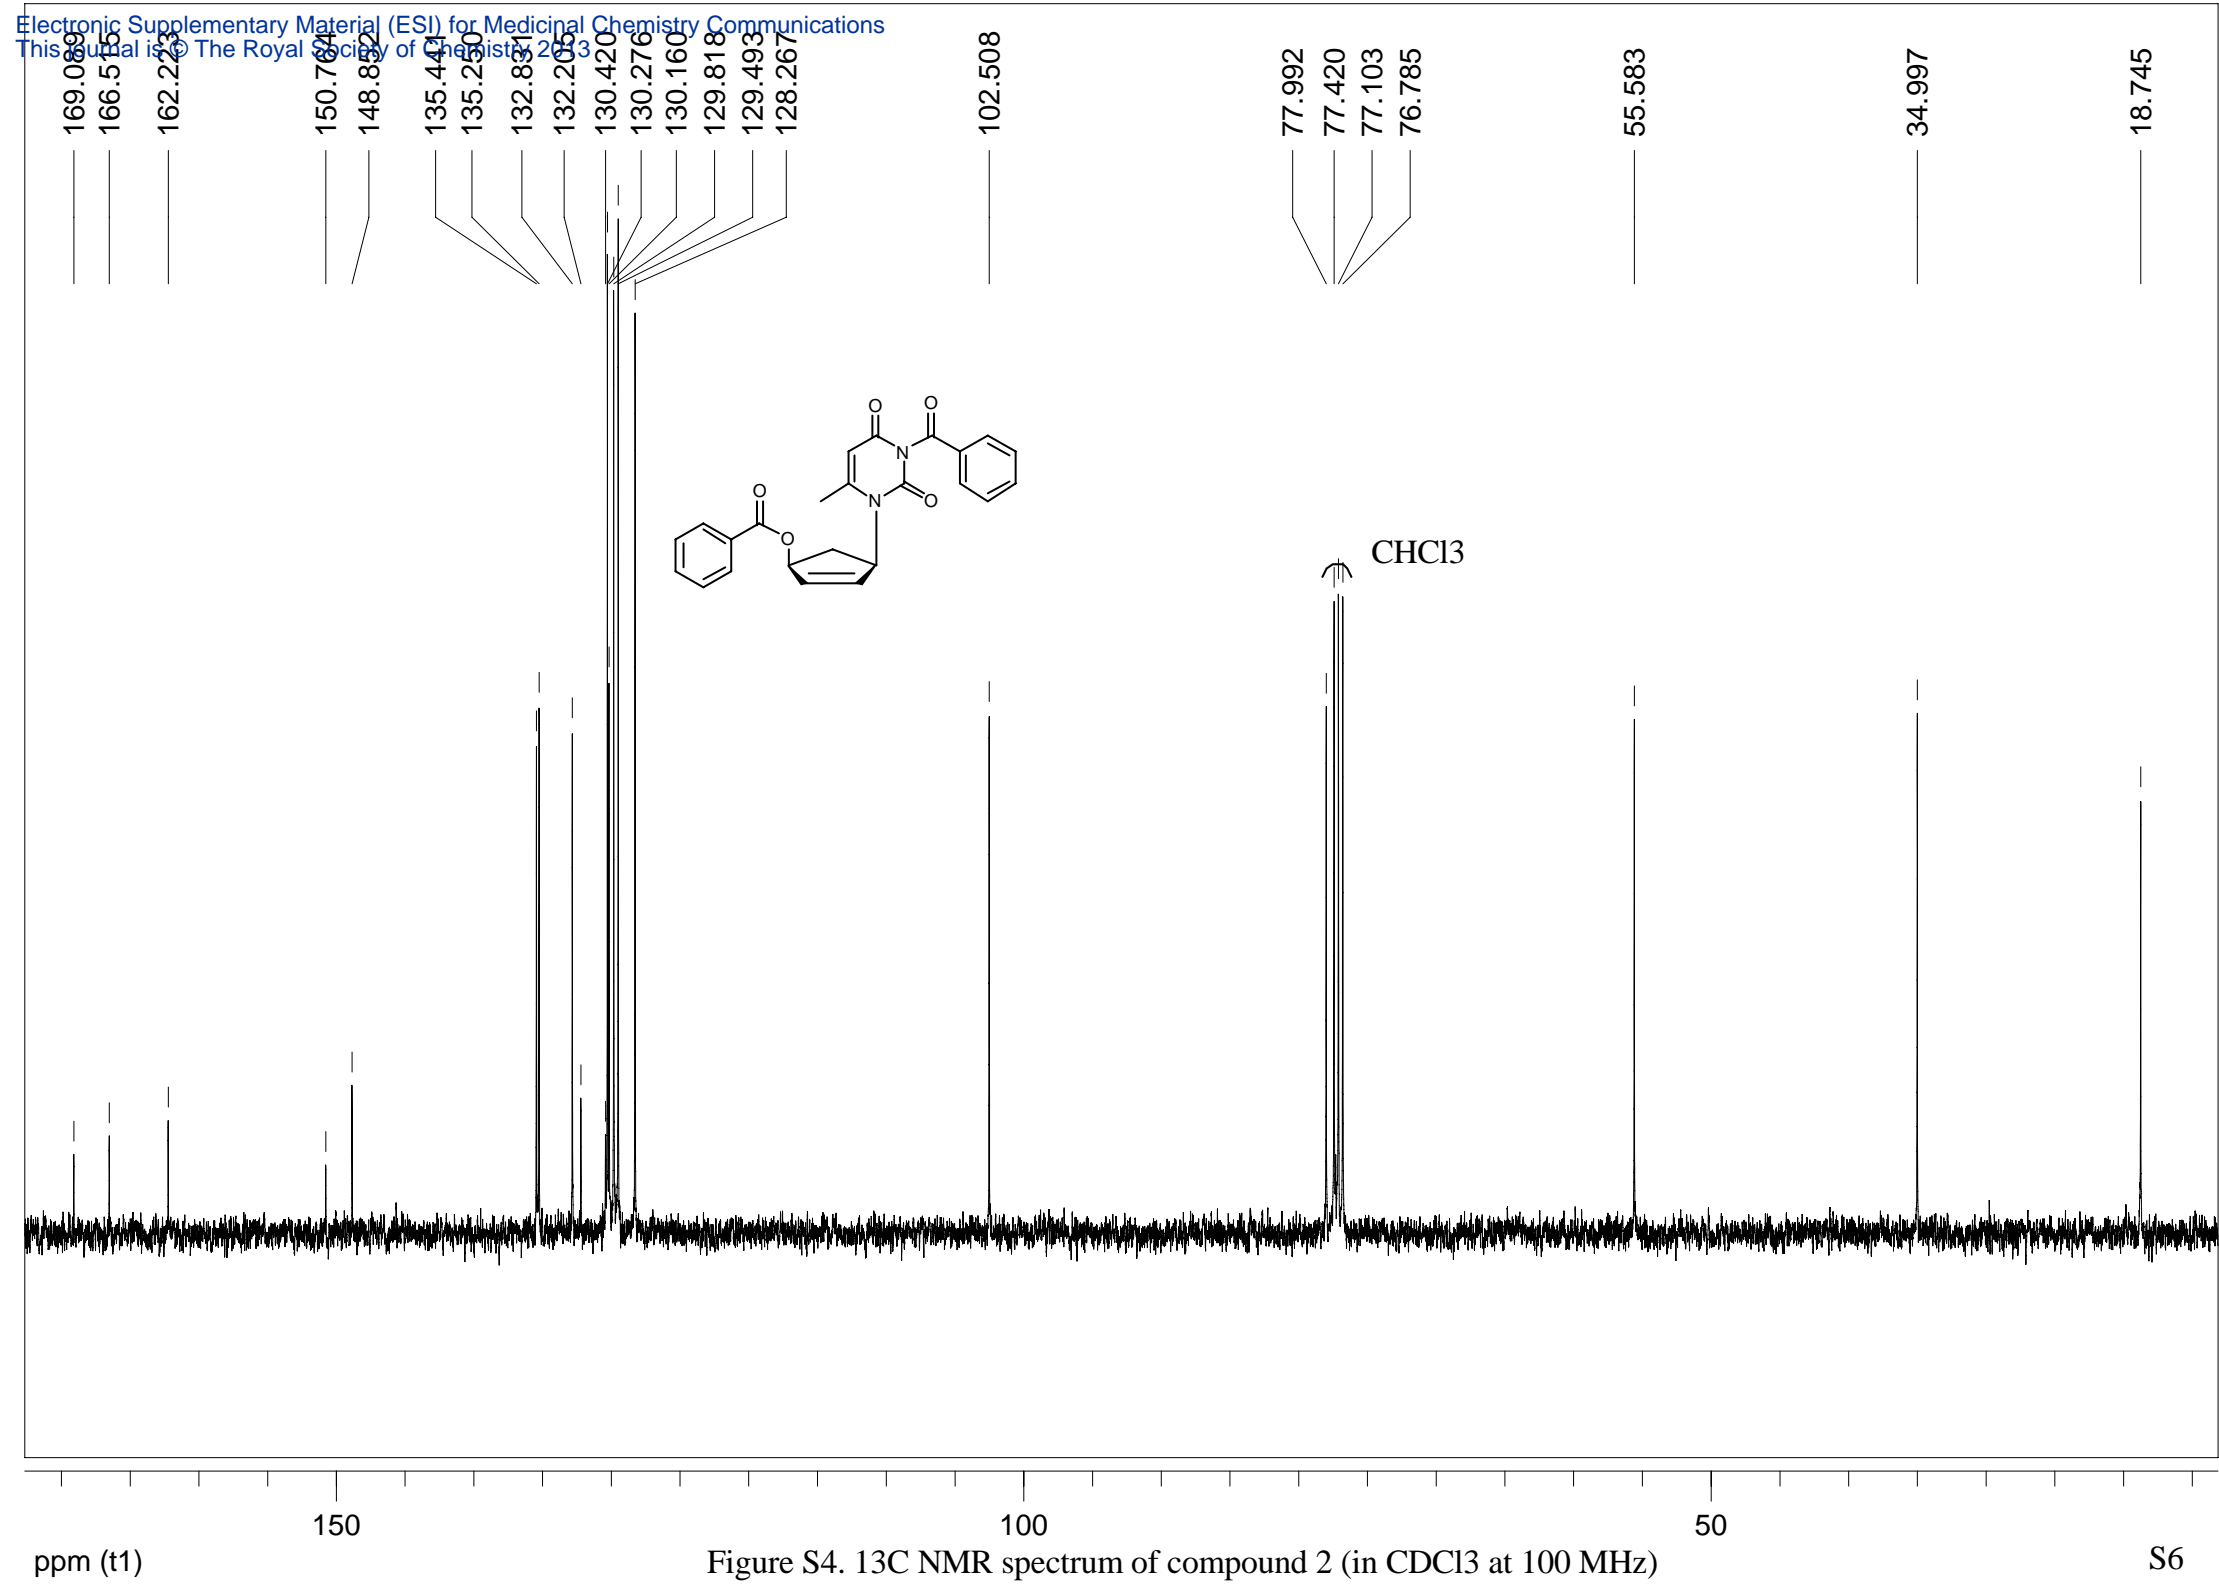

Figure S4. 13C NMR spectrum of compound 2 (in CDCl3 at 100 MHz)

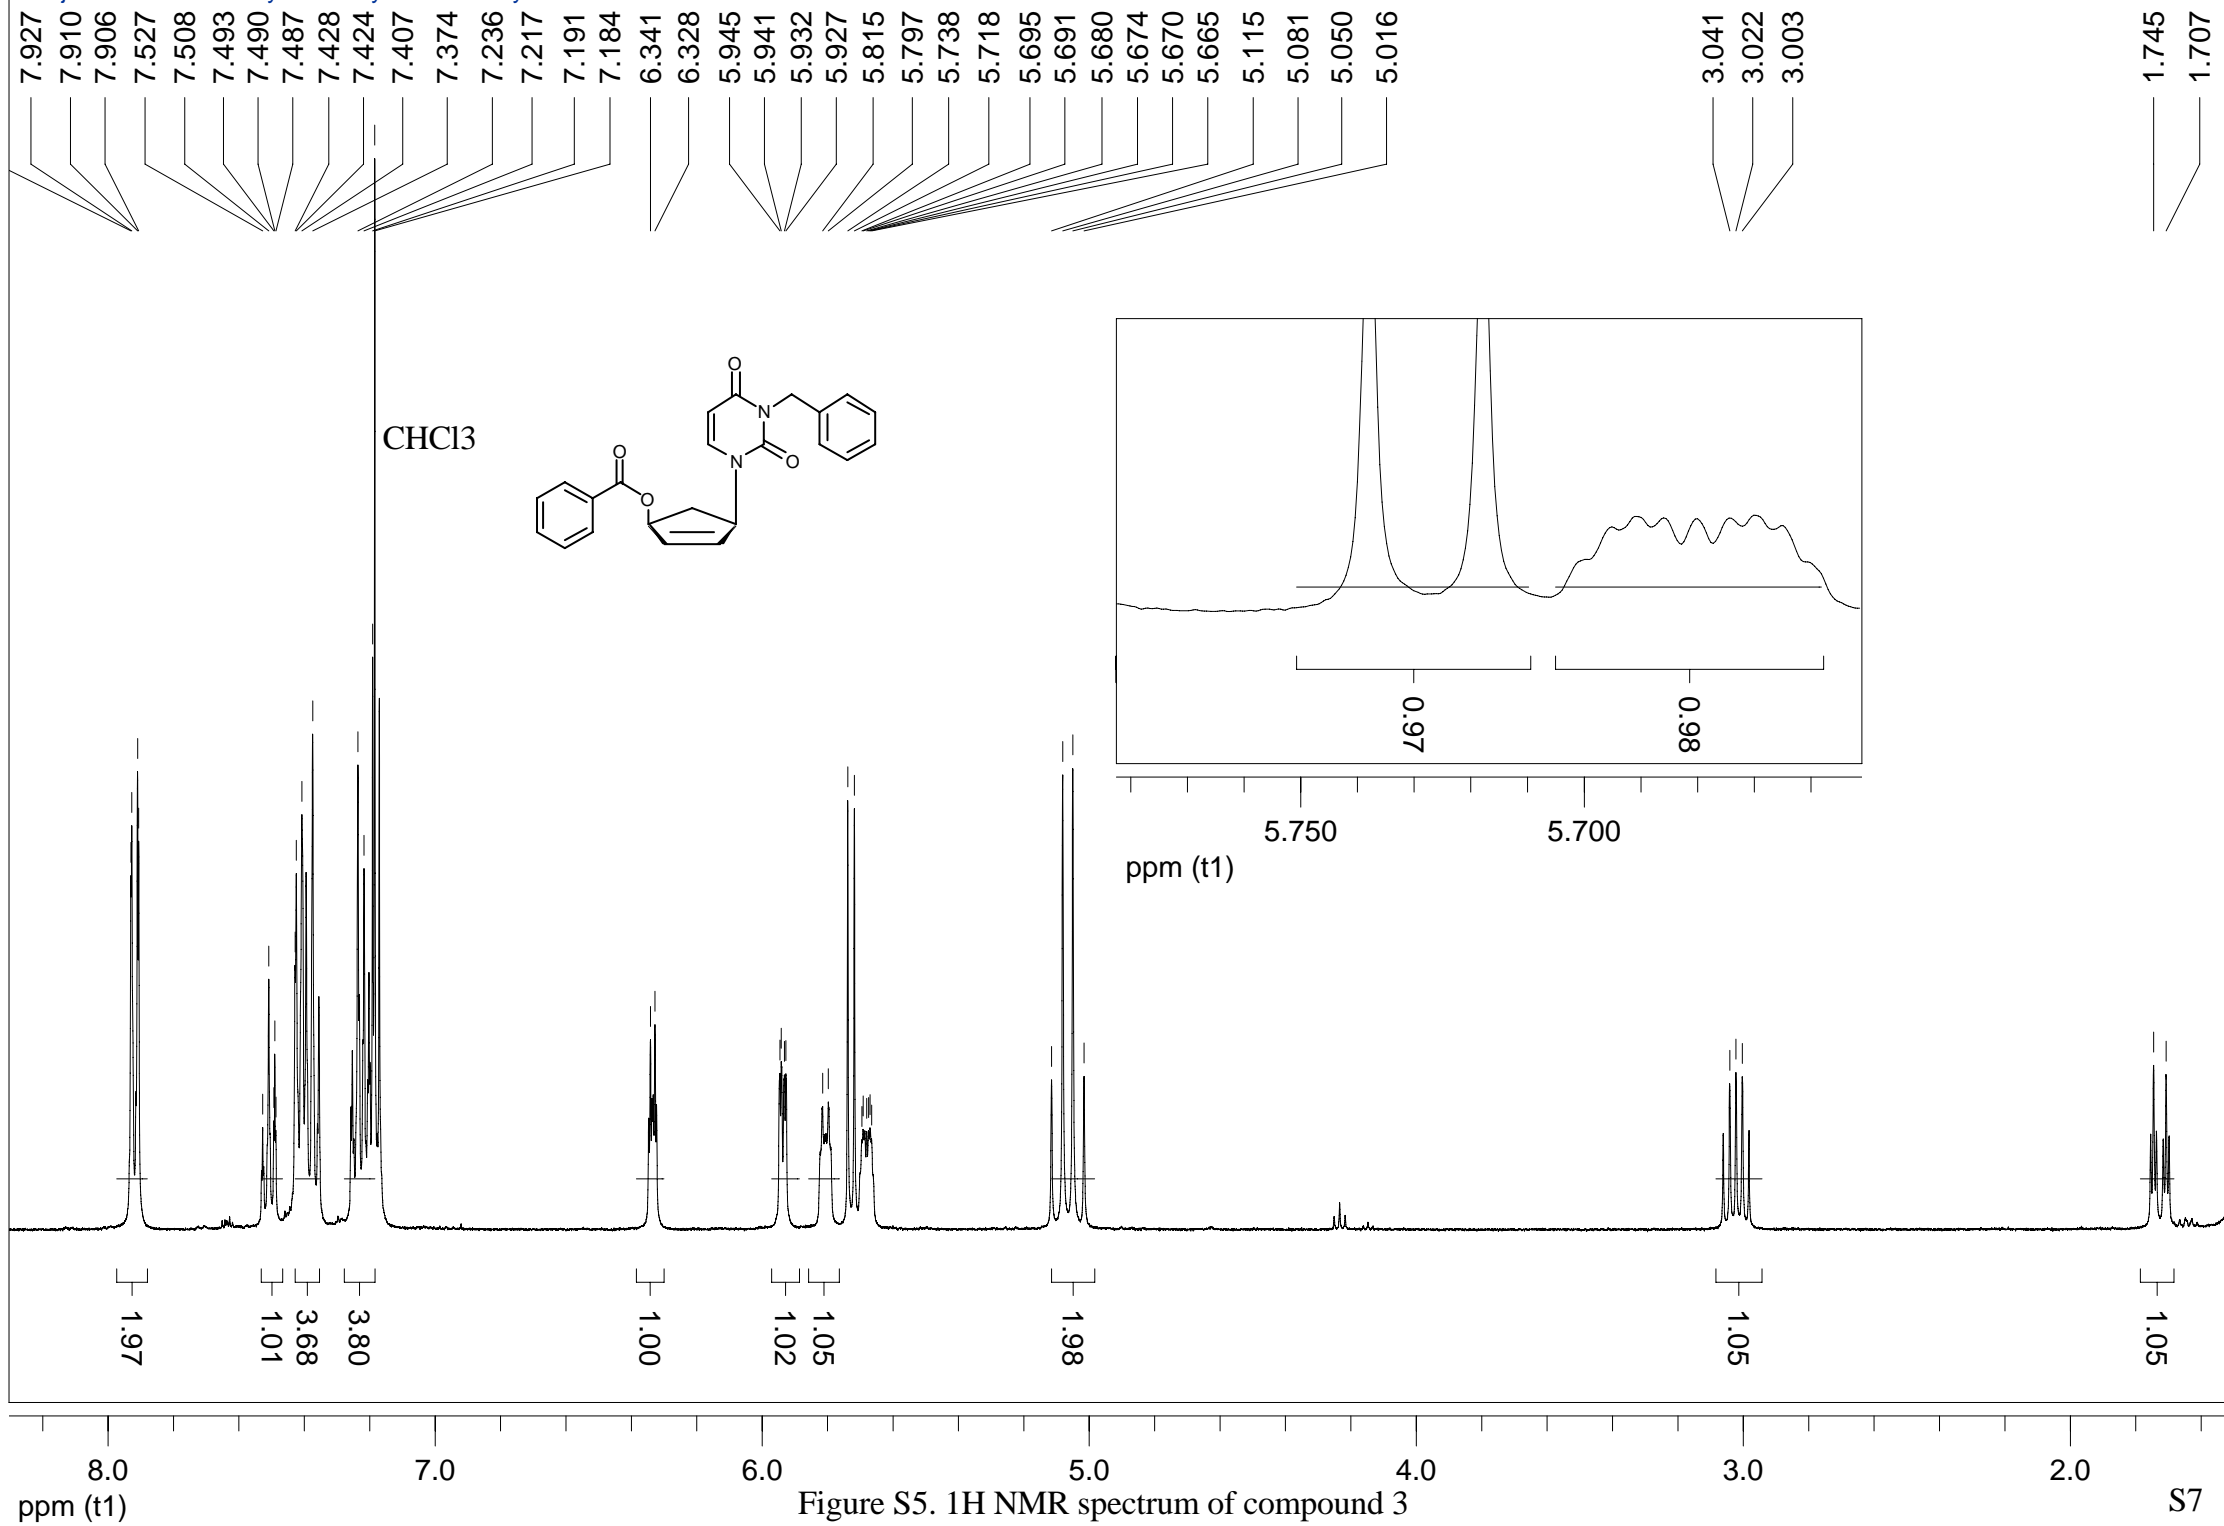

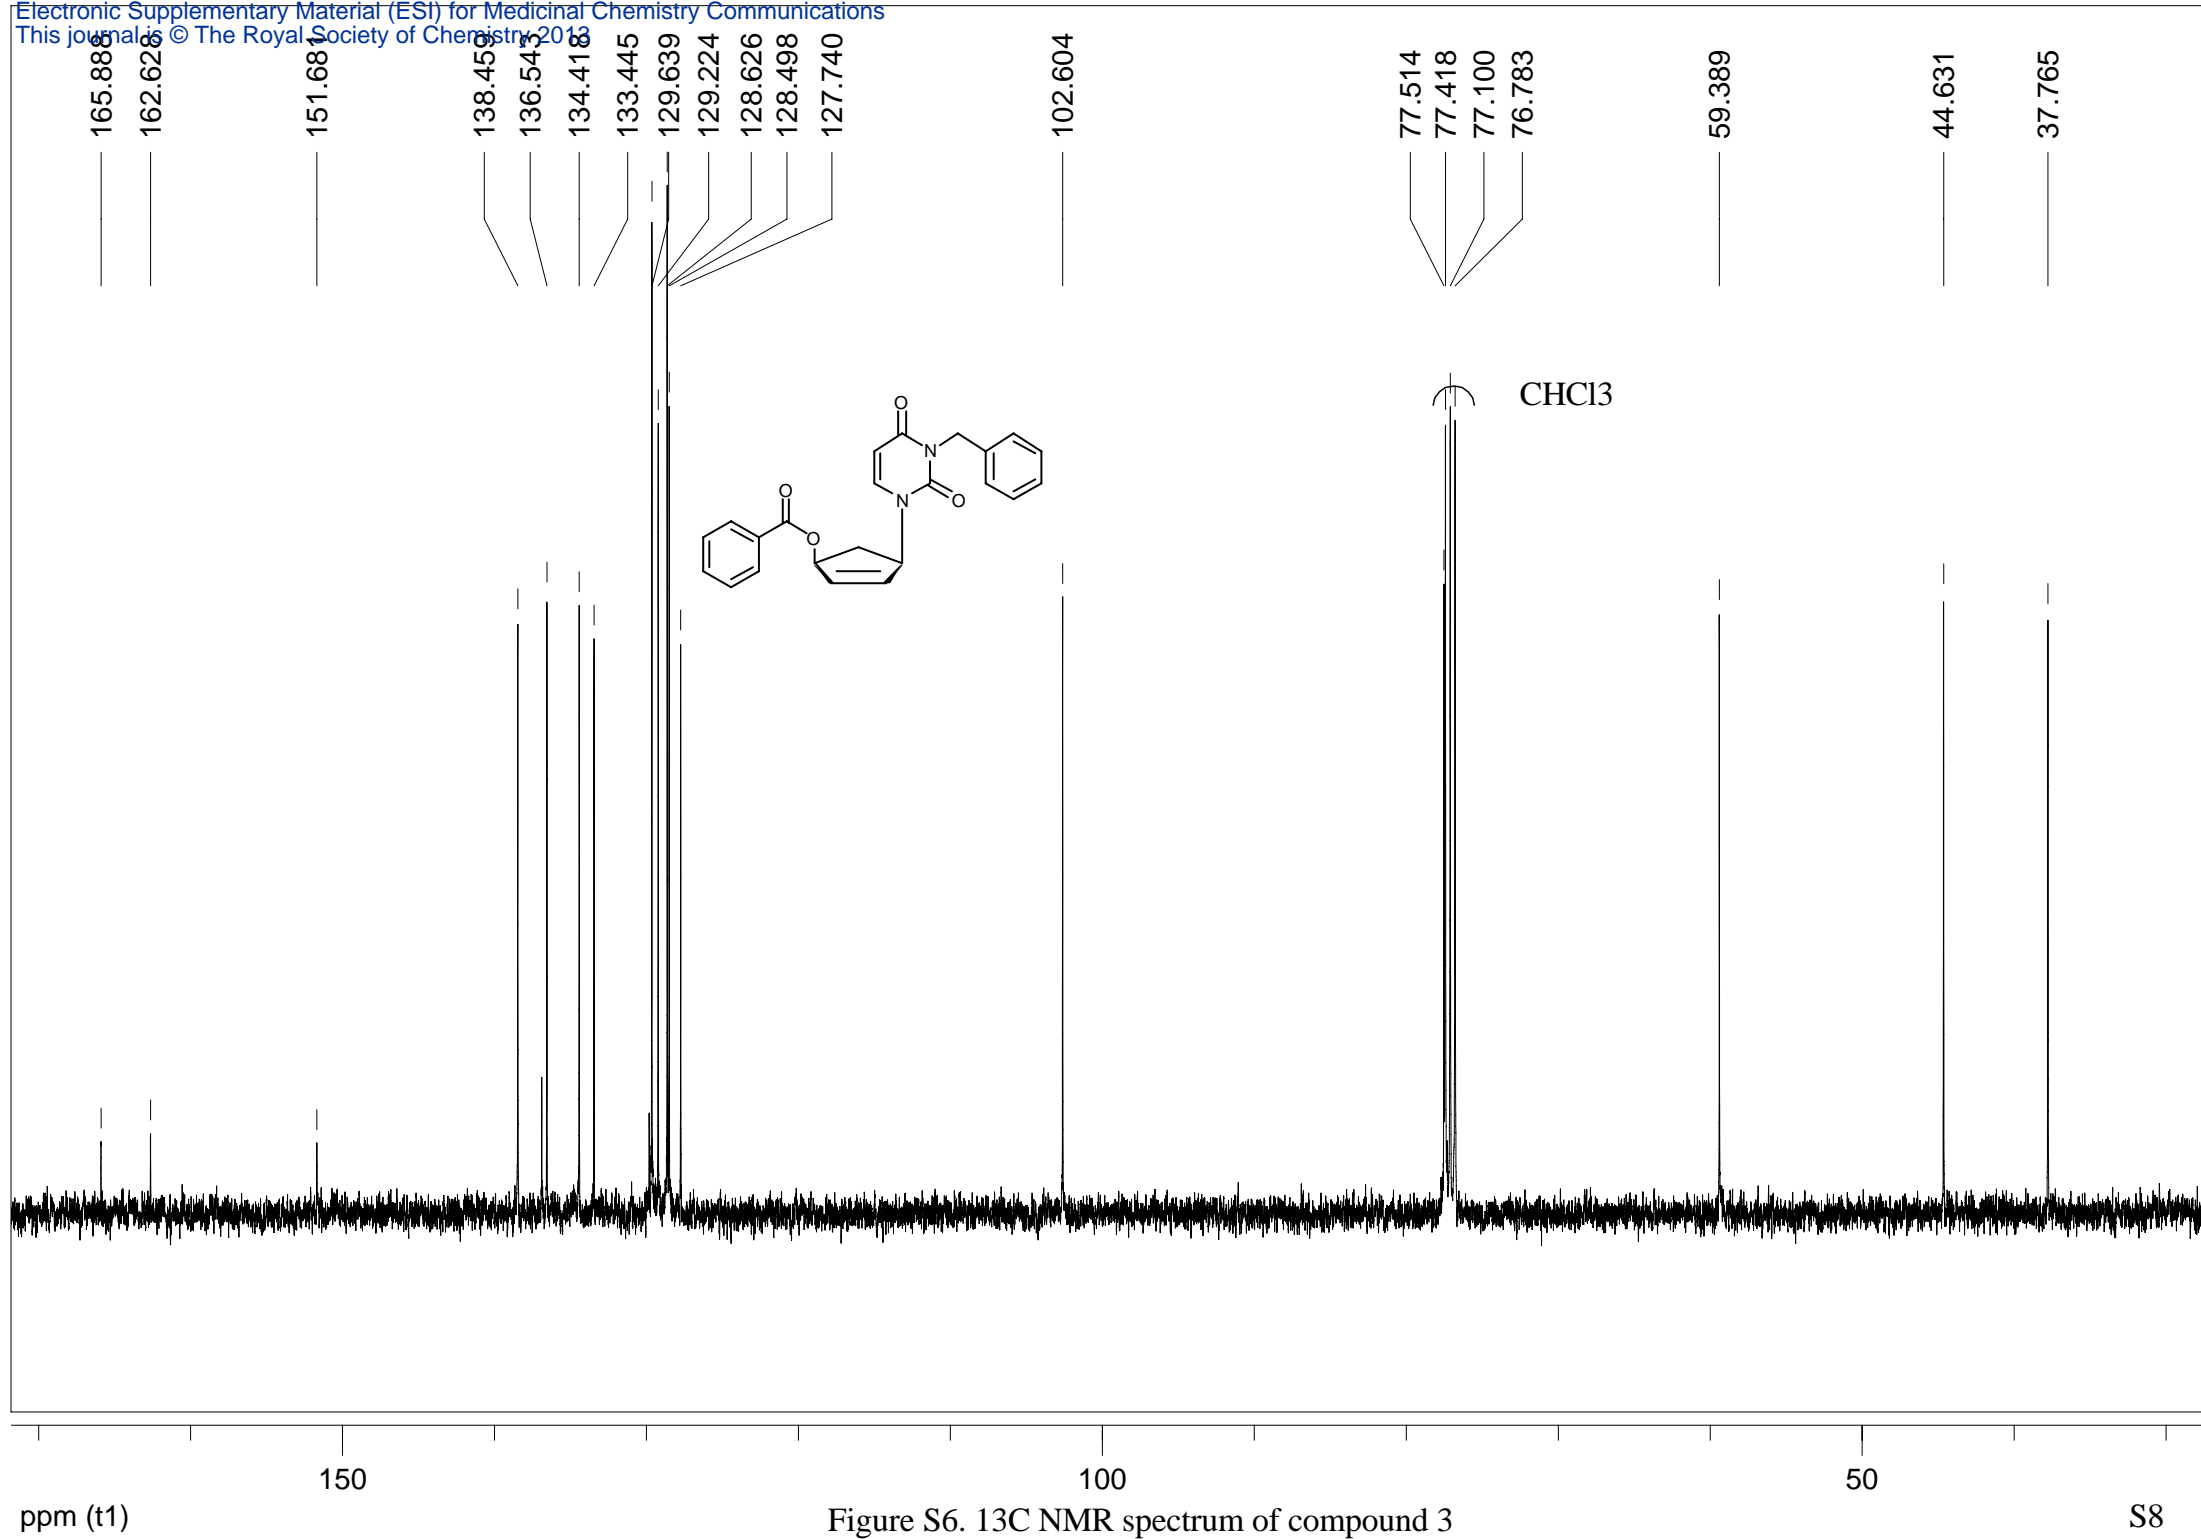

Figure S6. <sup>13</sup>C NMR spectrum of compound 3



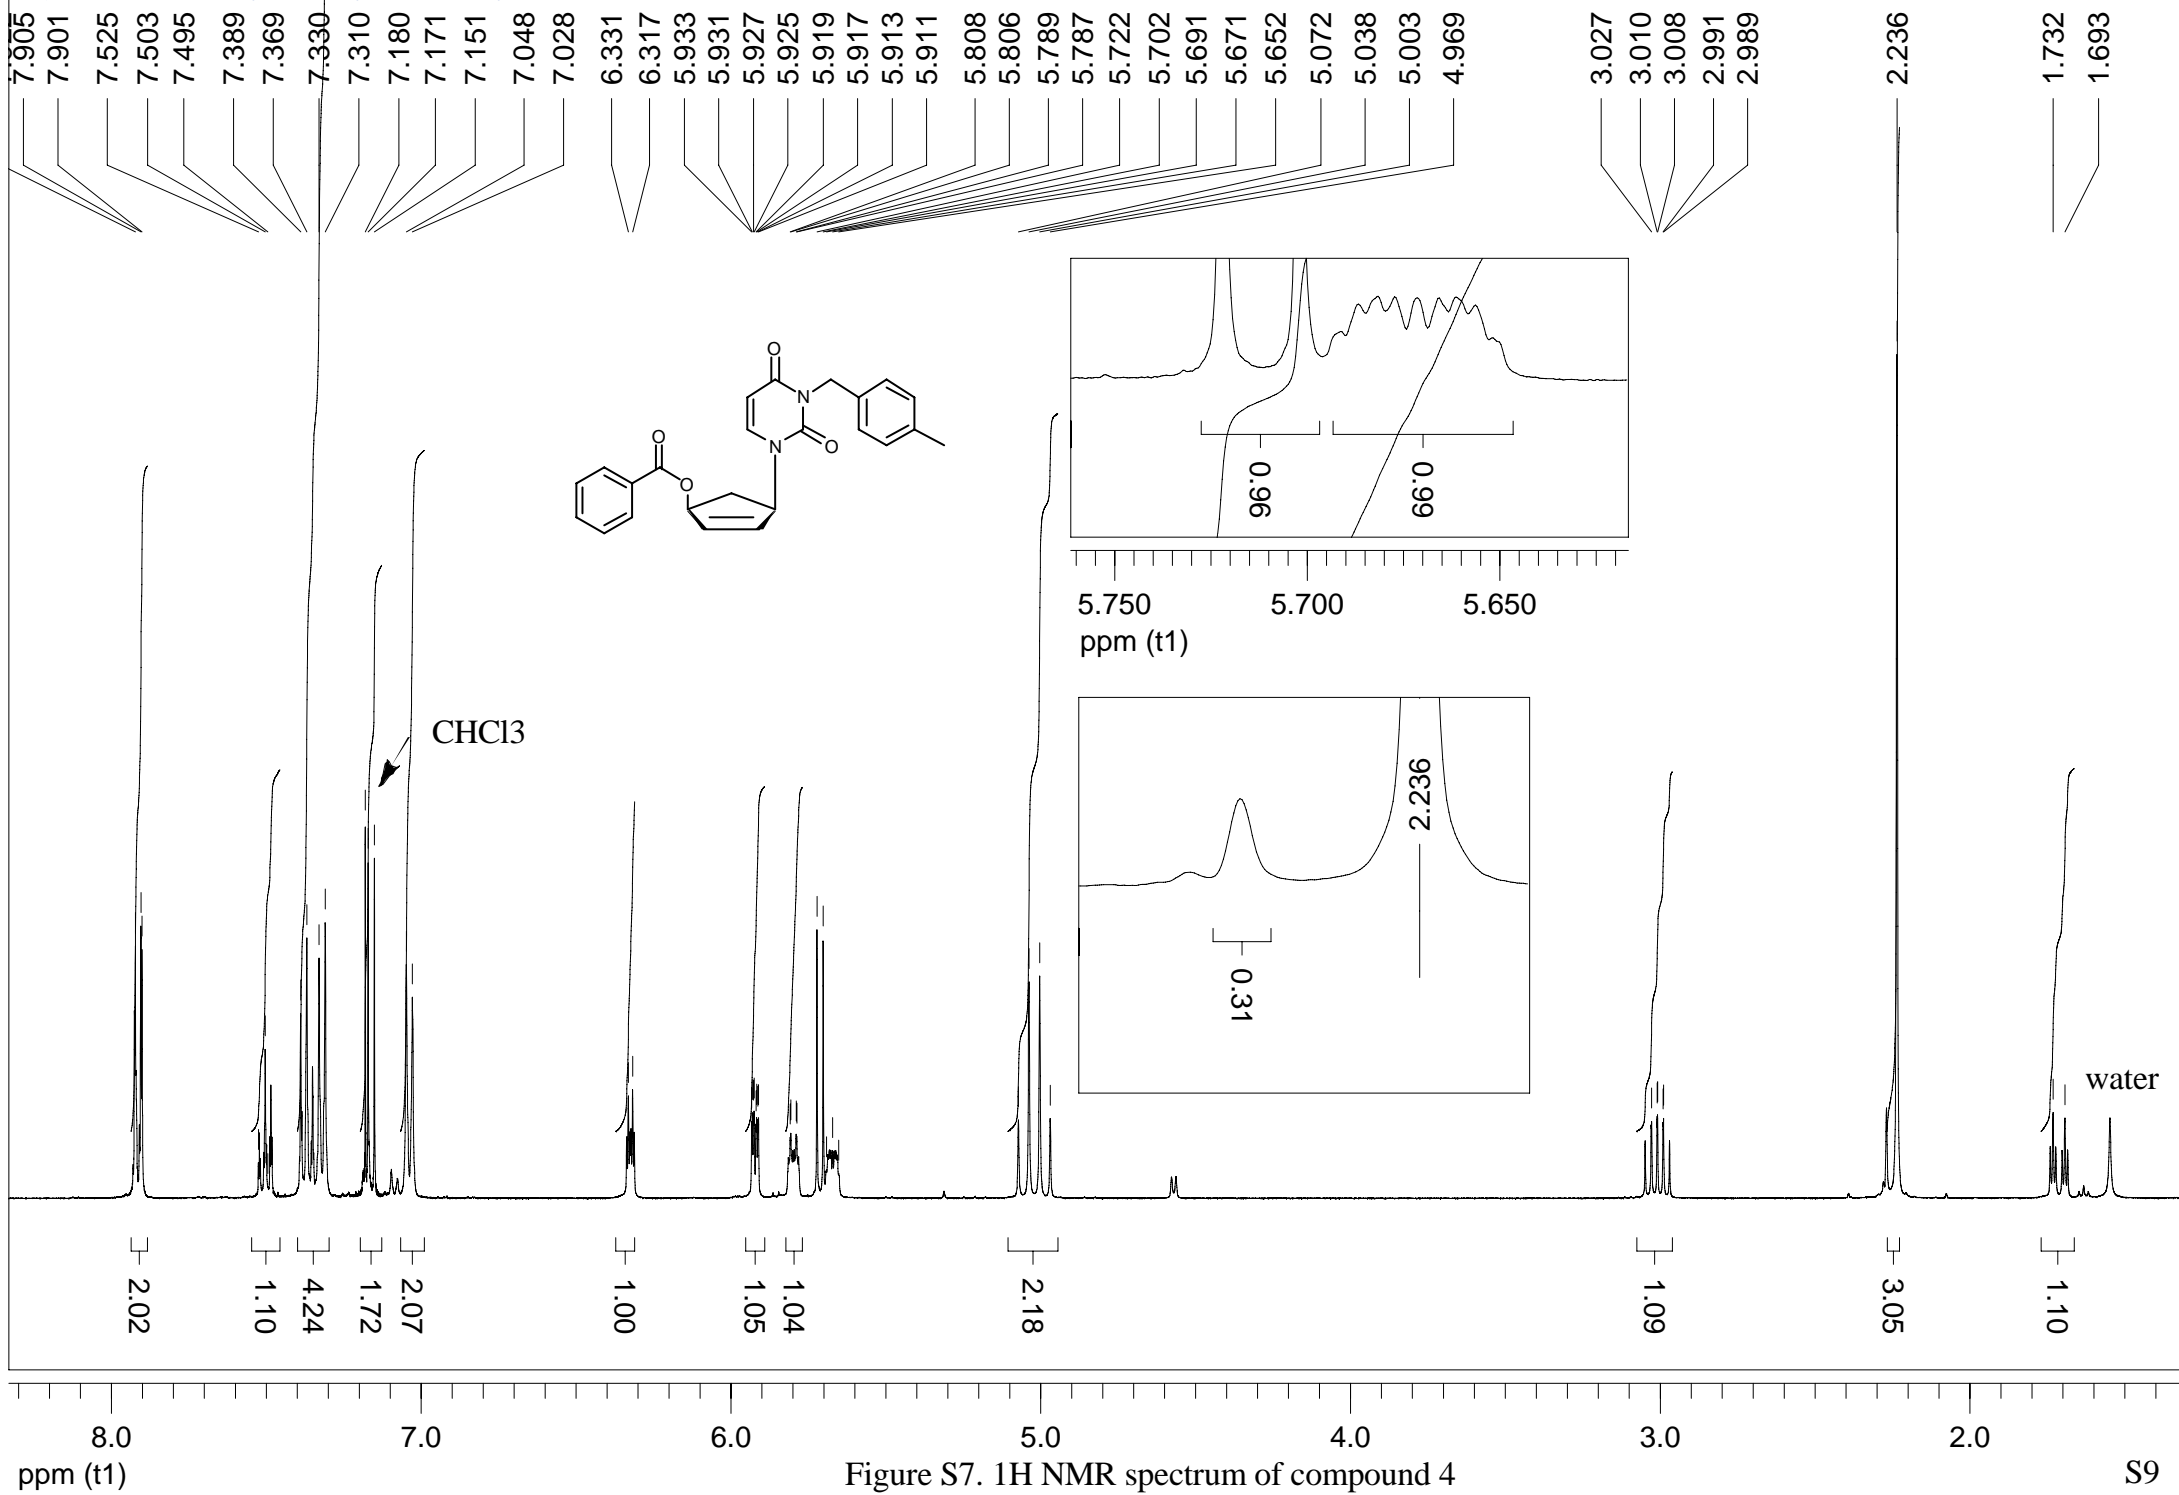

Figure S7. <sup>1</sup>H NMR spectrum of compound 4

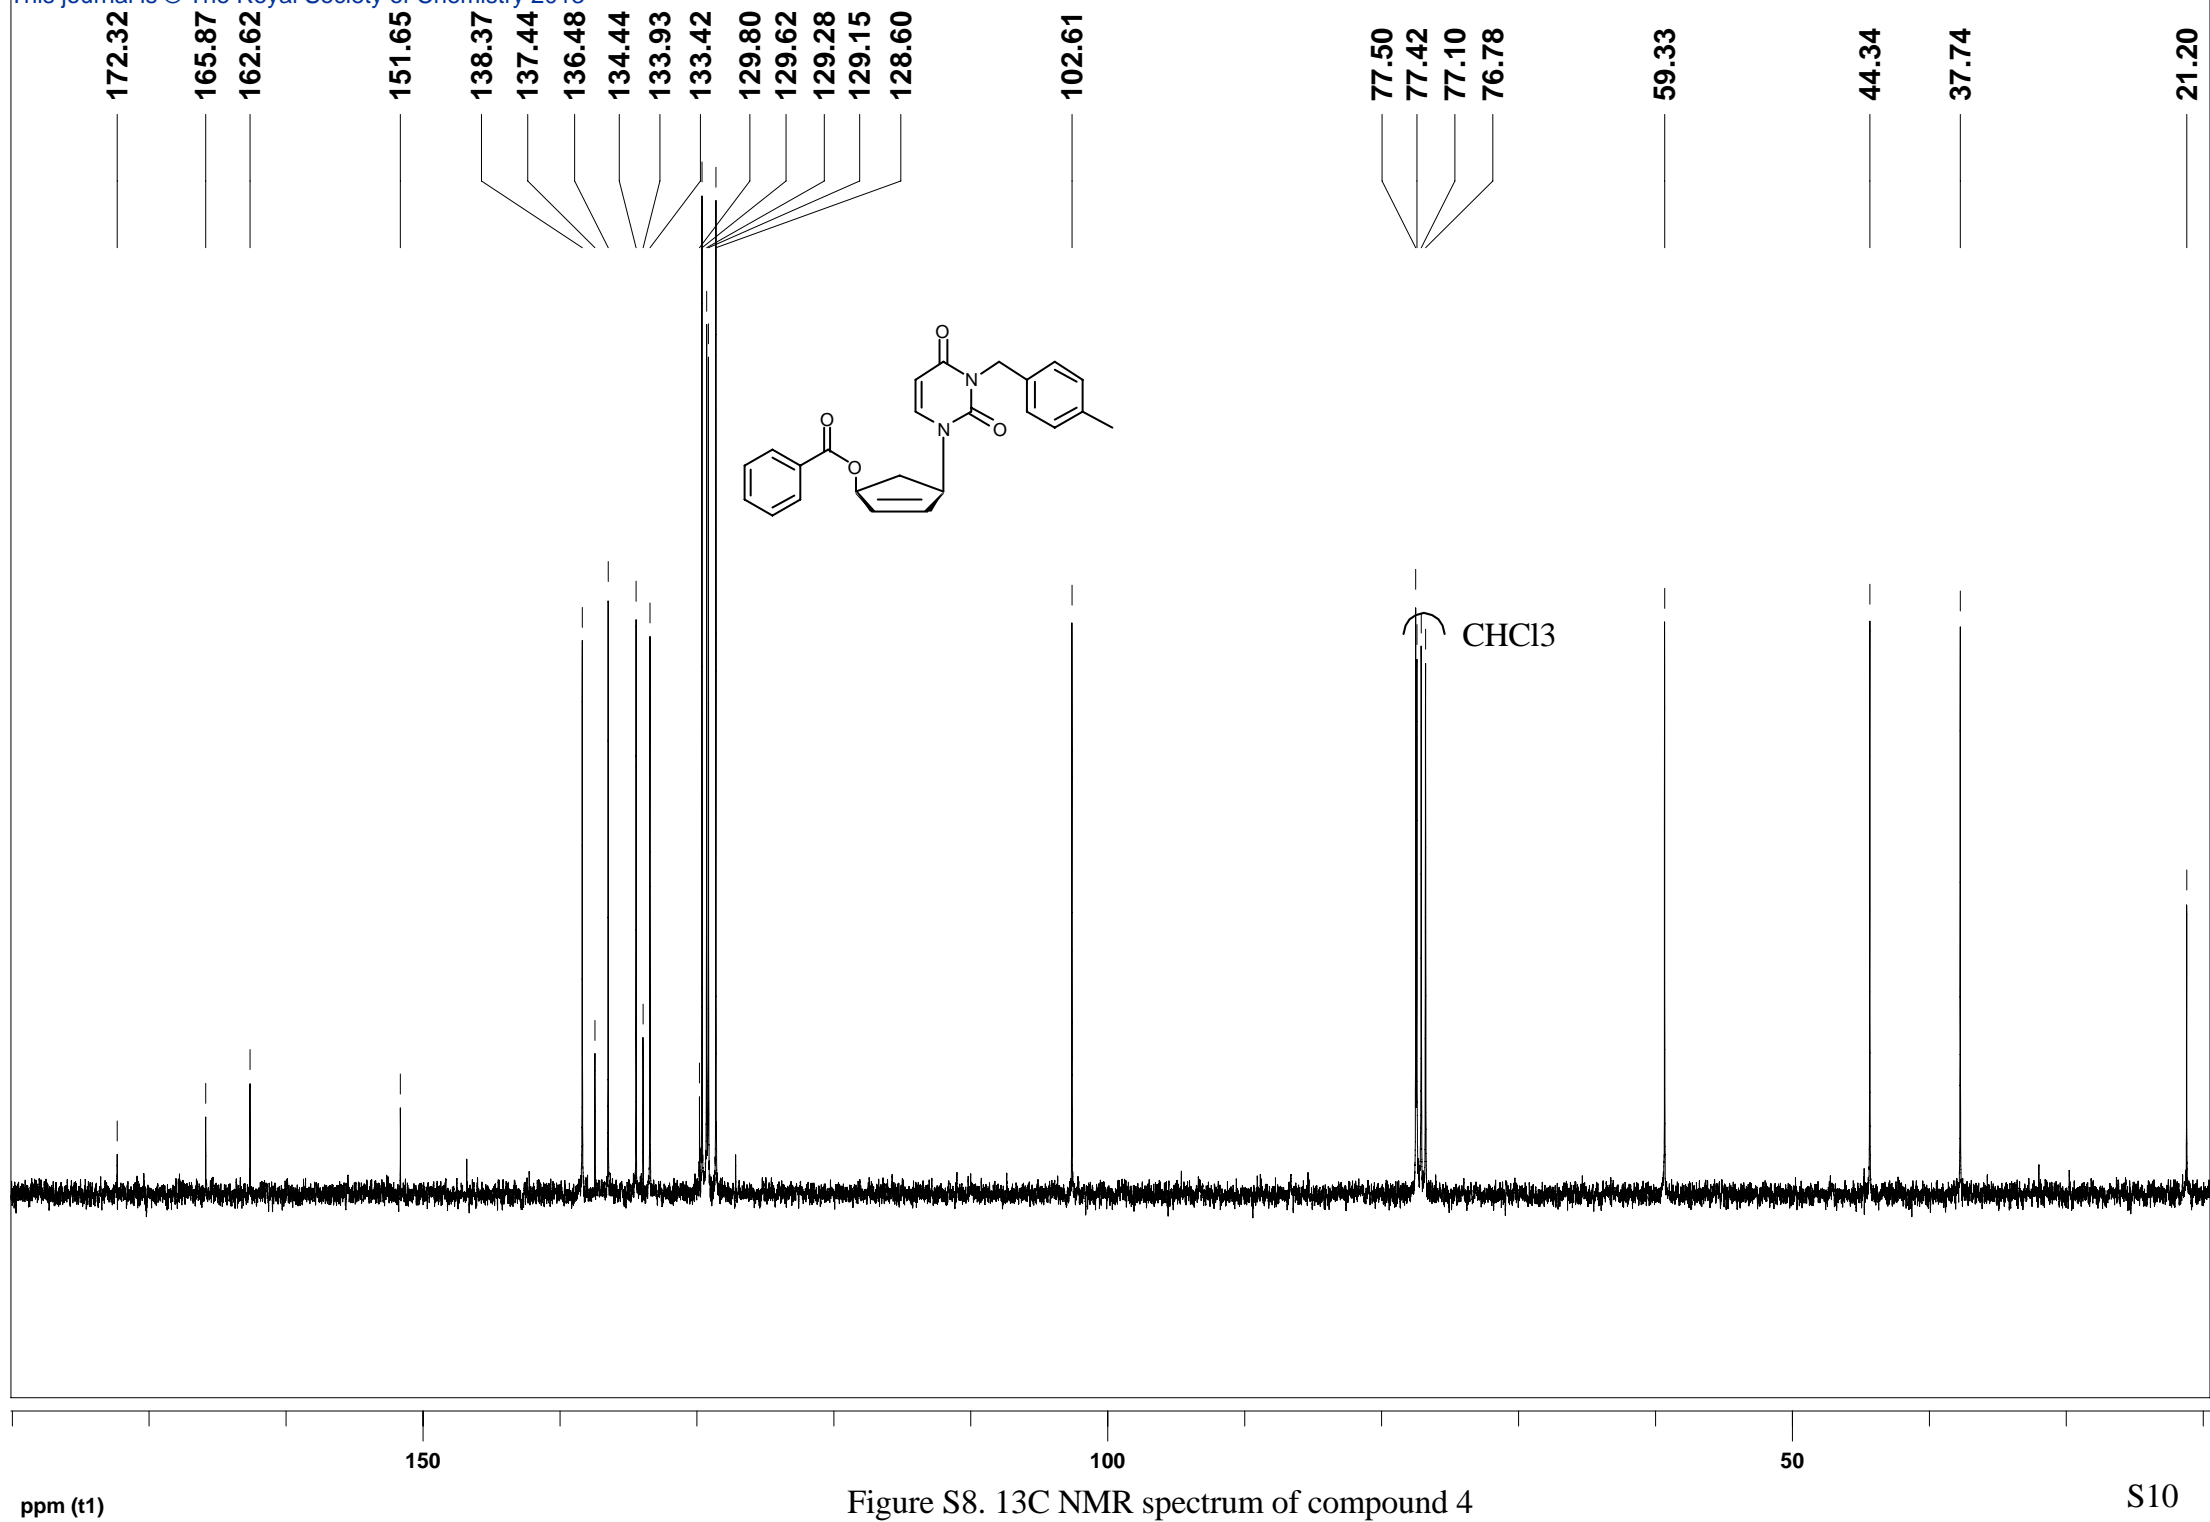

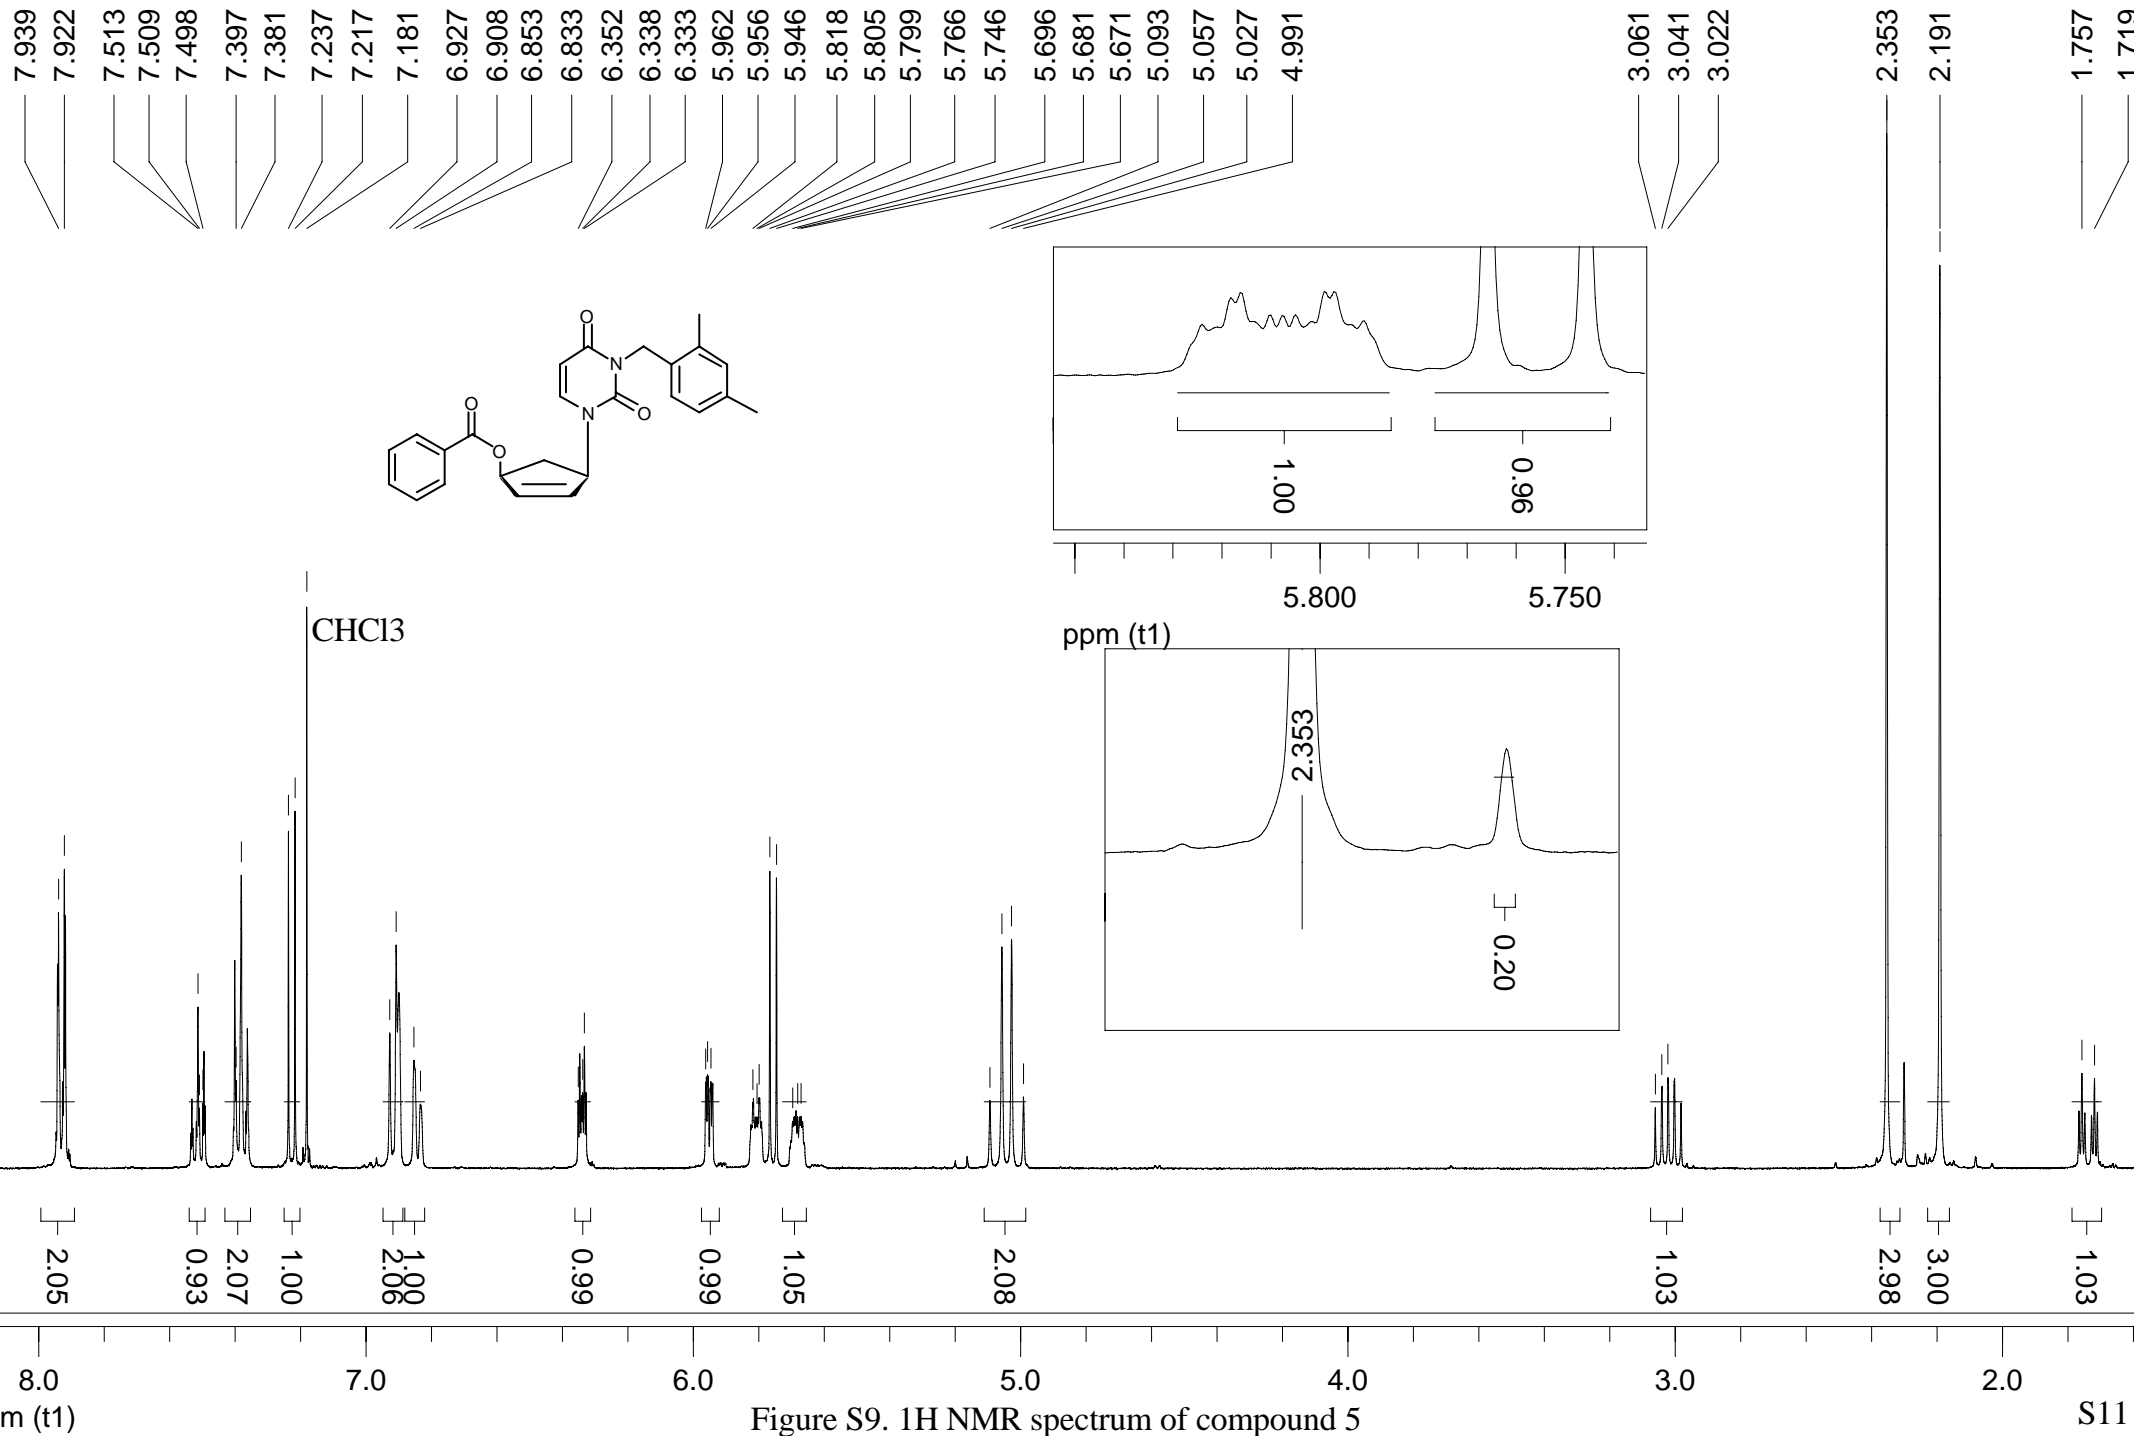

Figure S9. <sup>1</sup>H NMR spectrum of compound 5

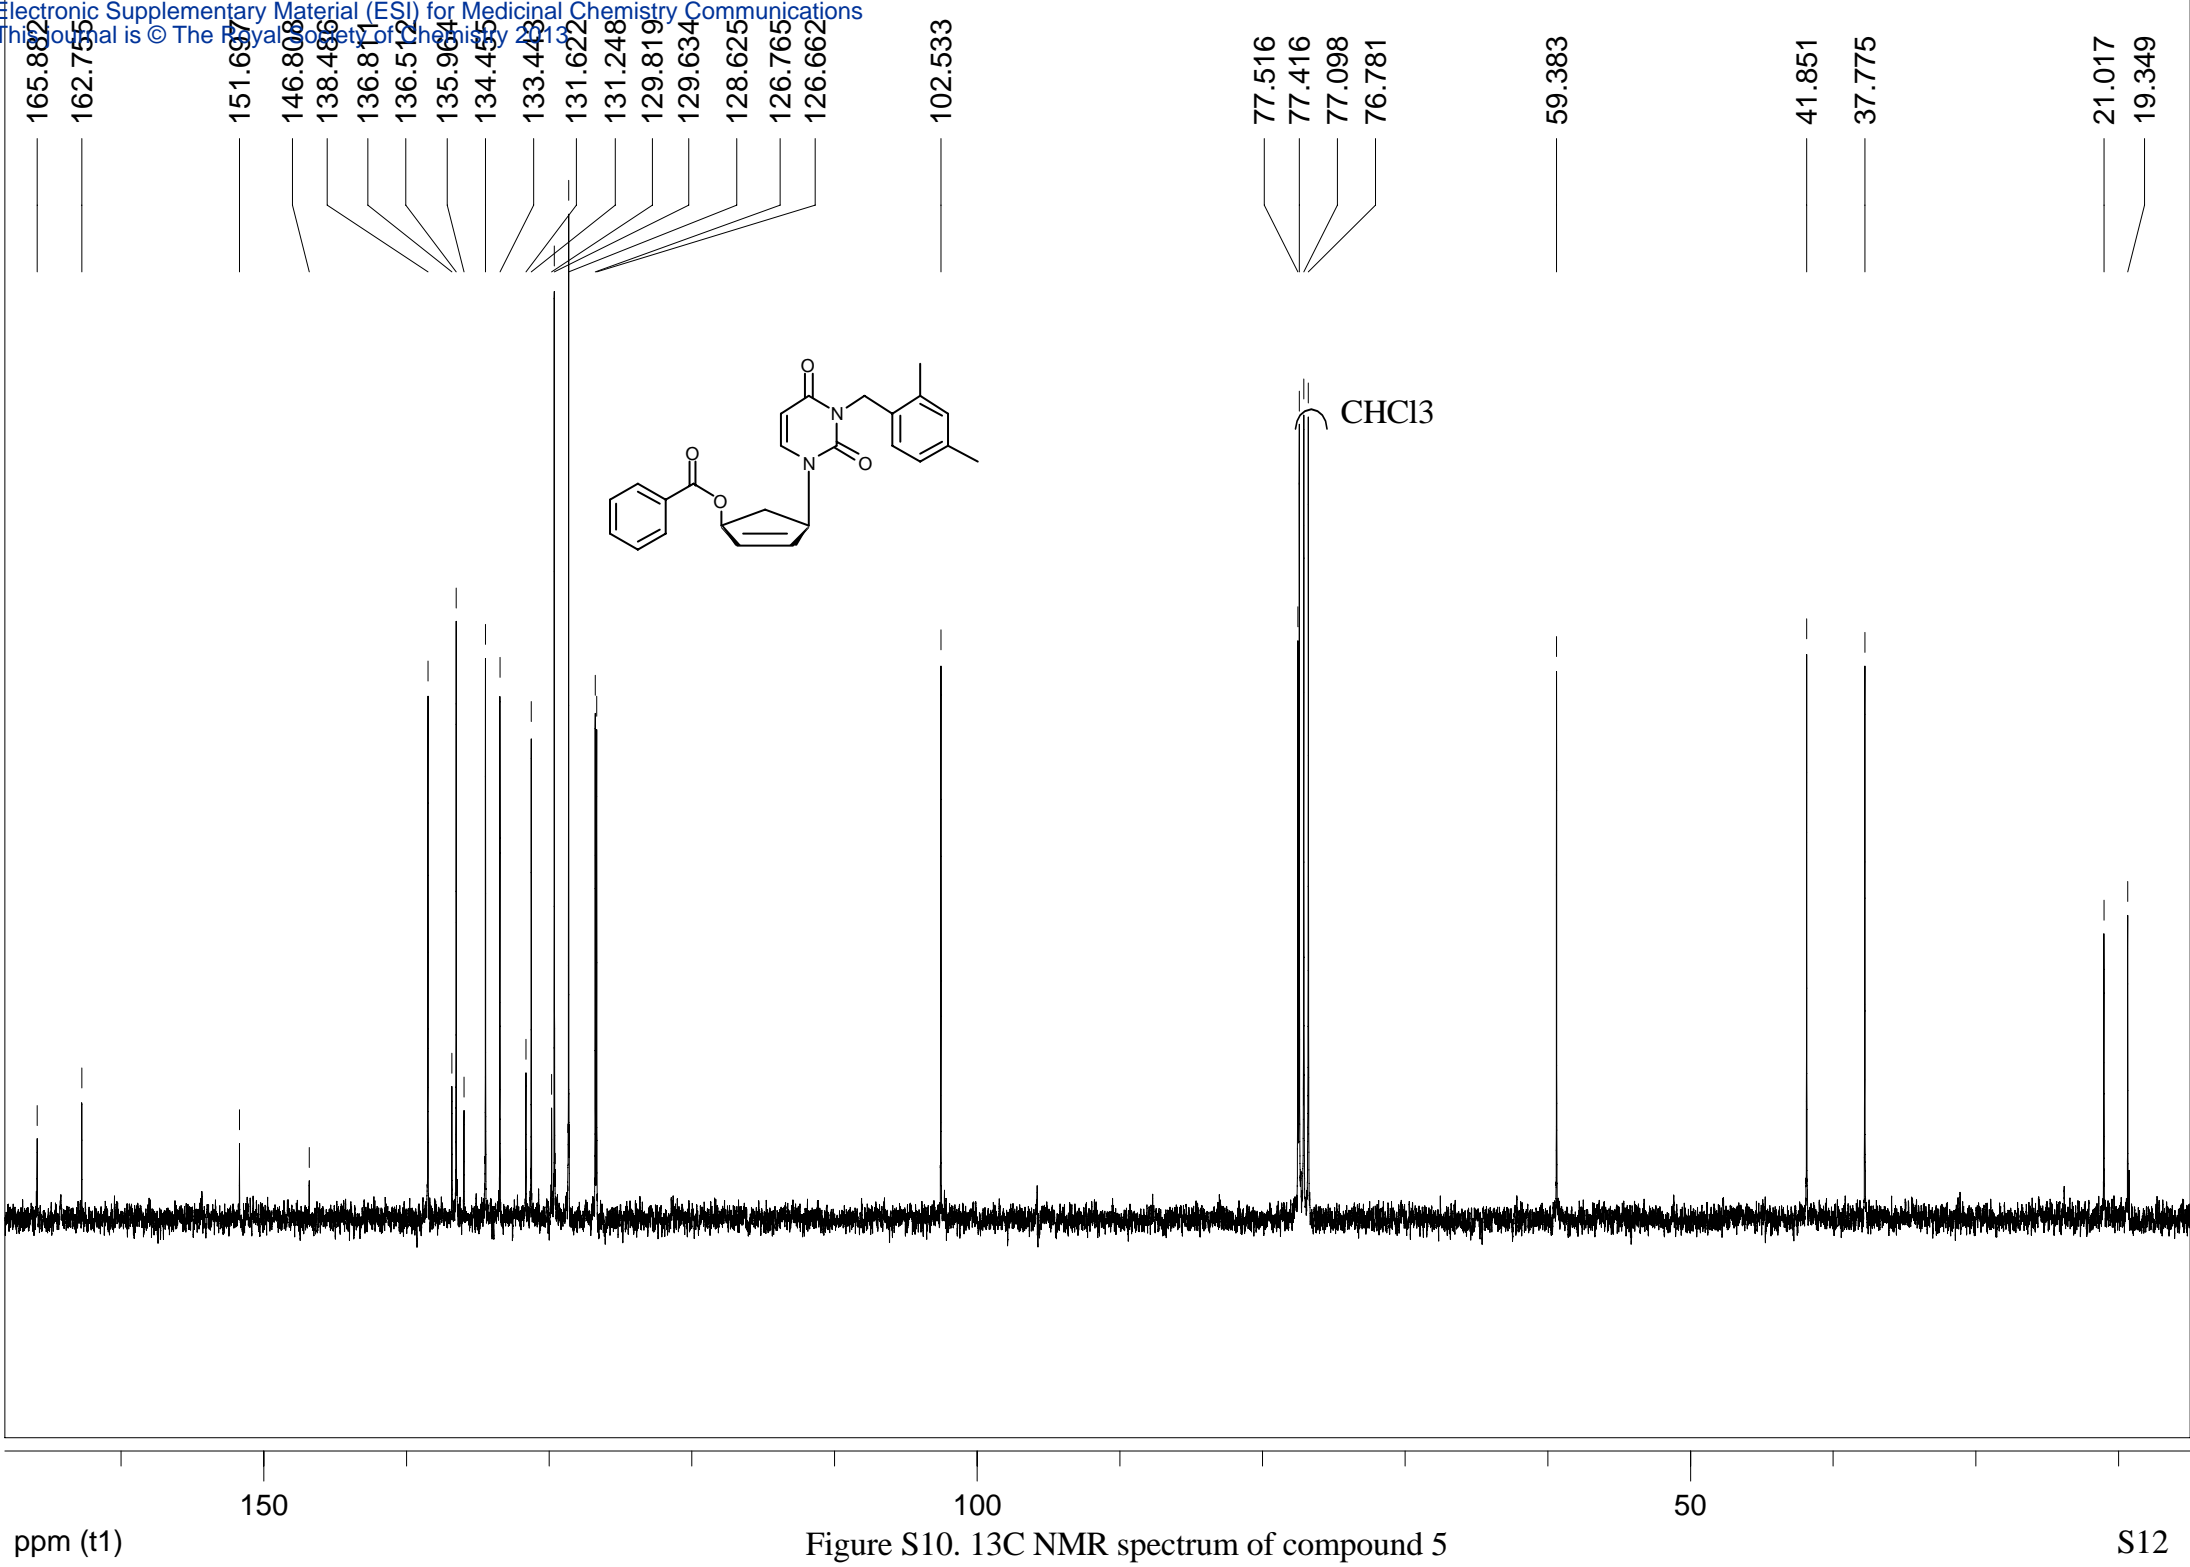

Figure S10. <sup>13</sup>C NMR spectrum of compound 5

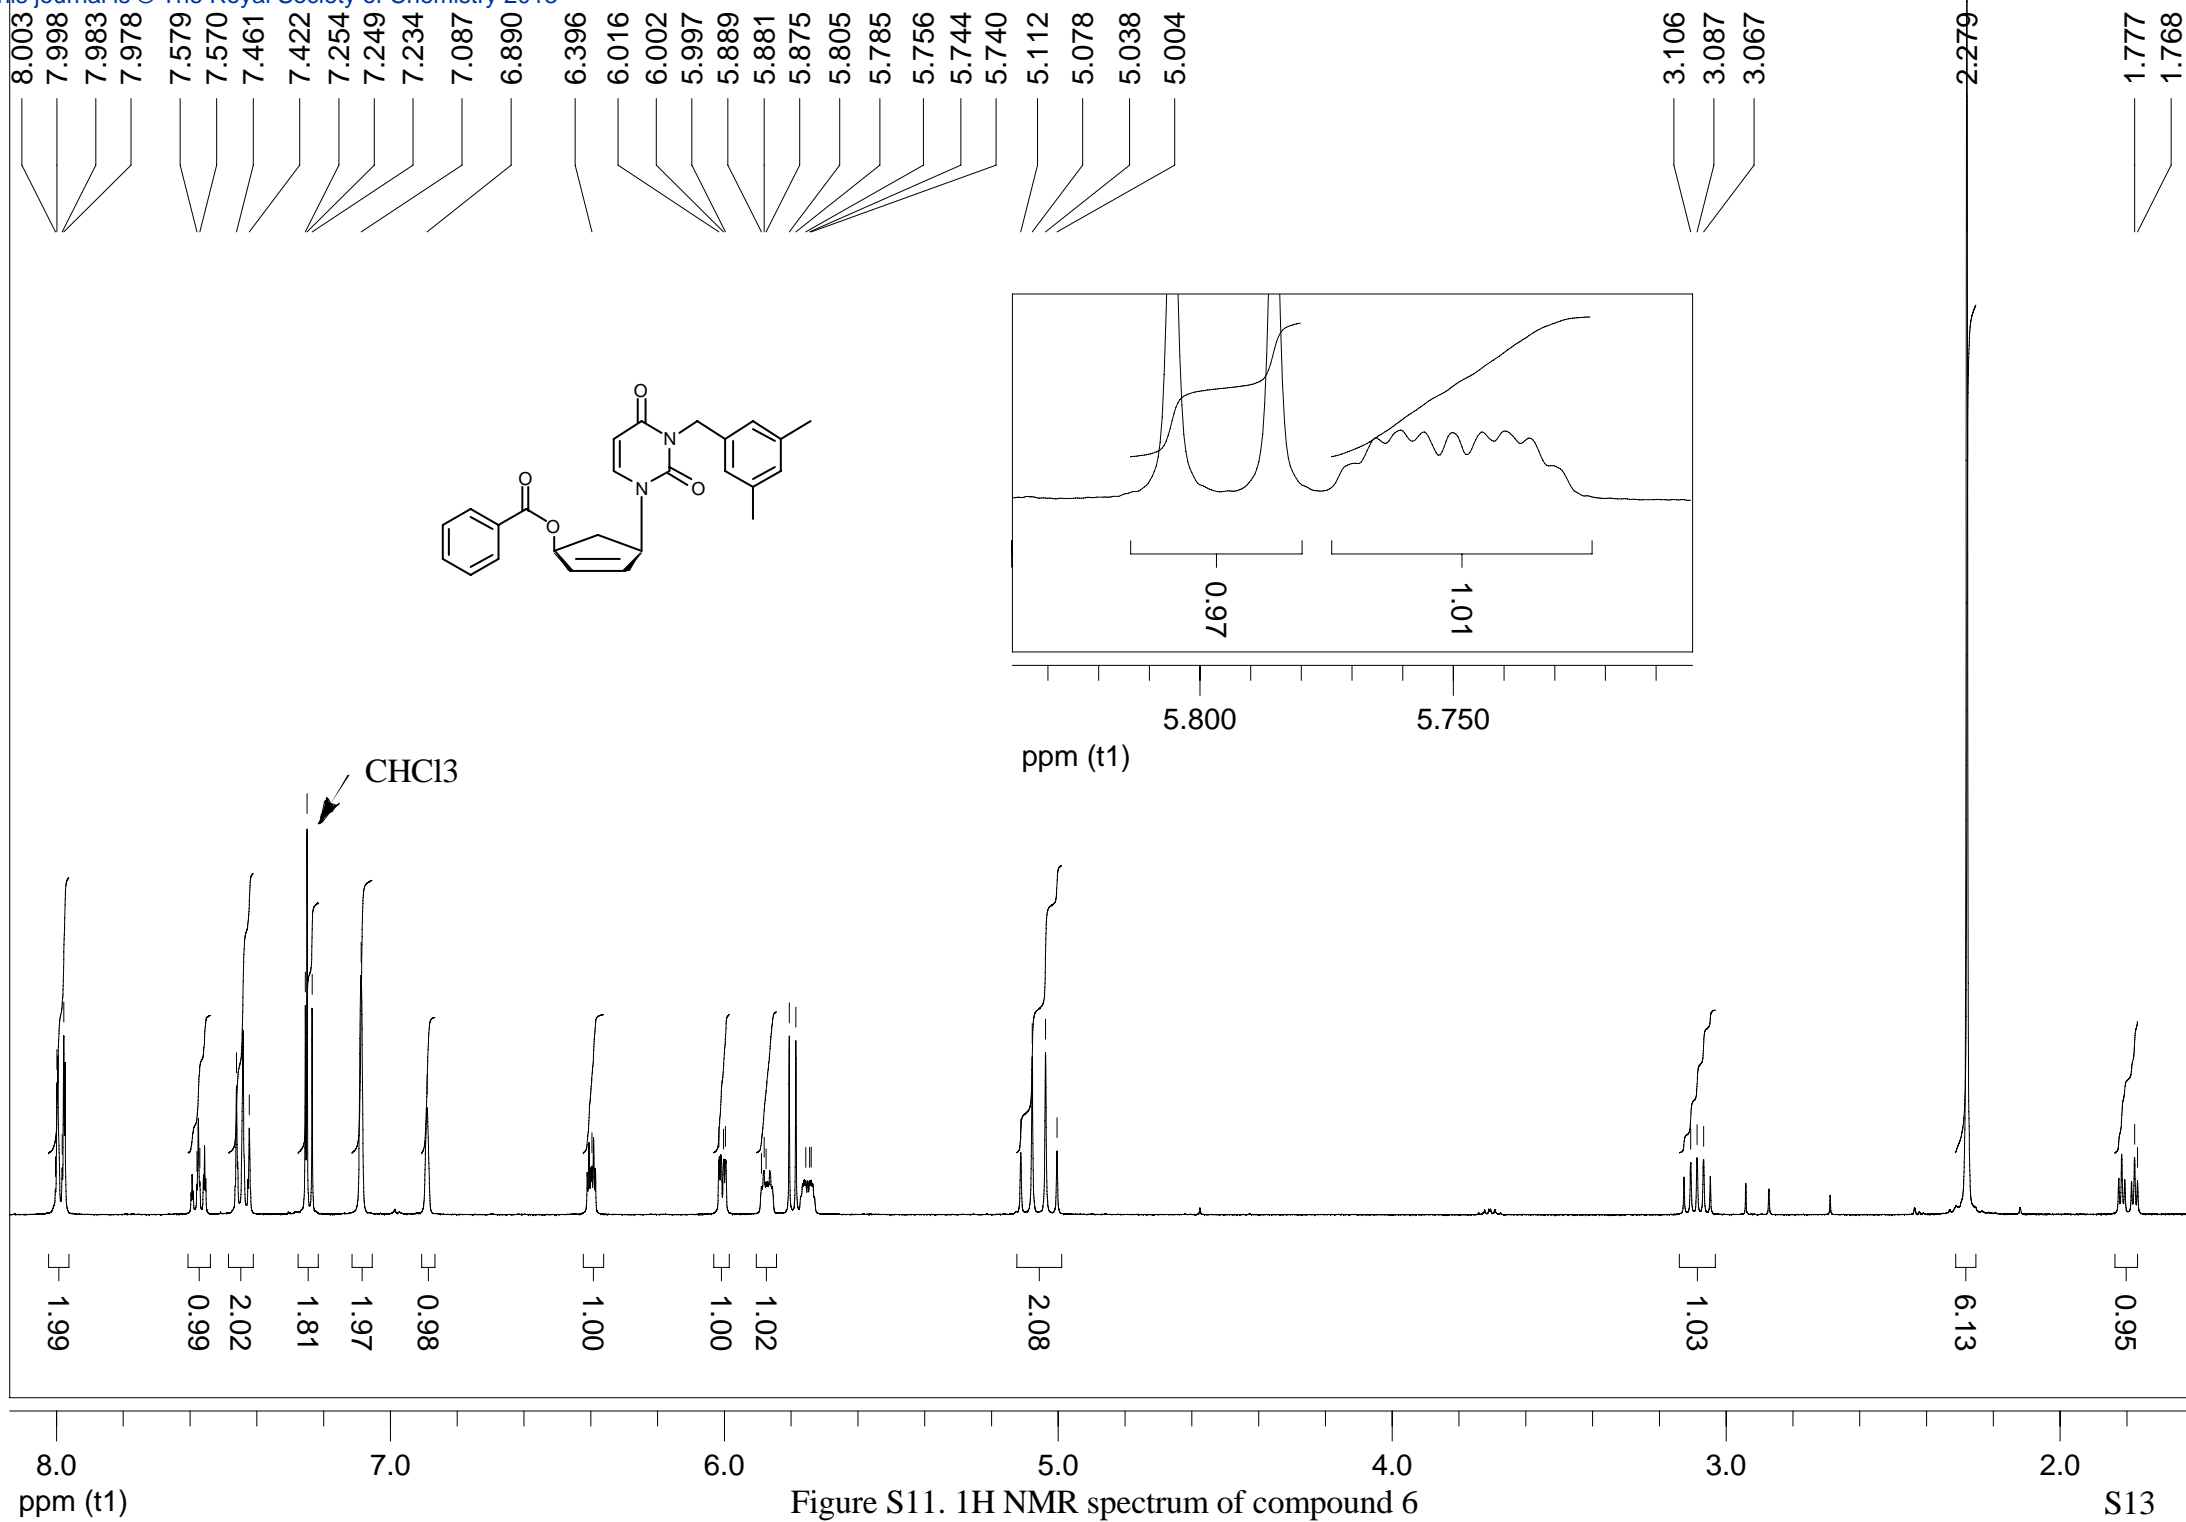

Figure S11. <sup>1</sup>H NMR spectrum of compound 6

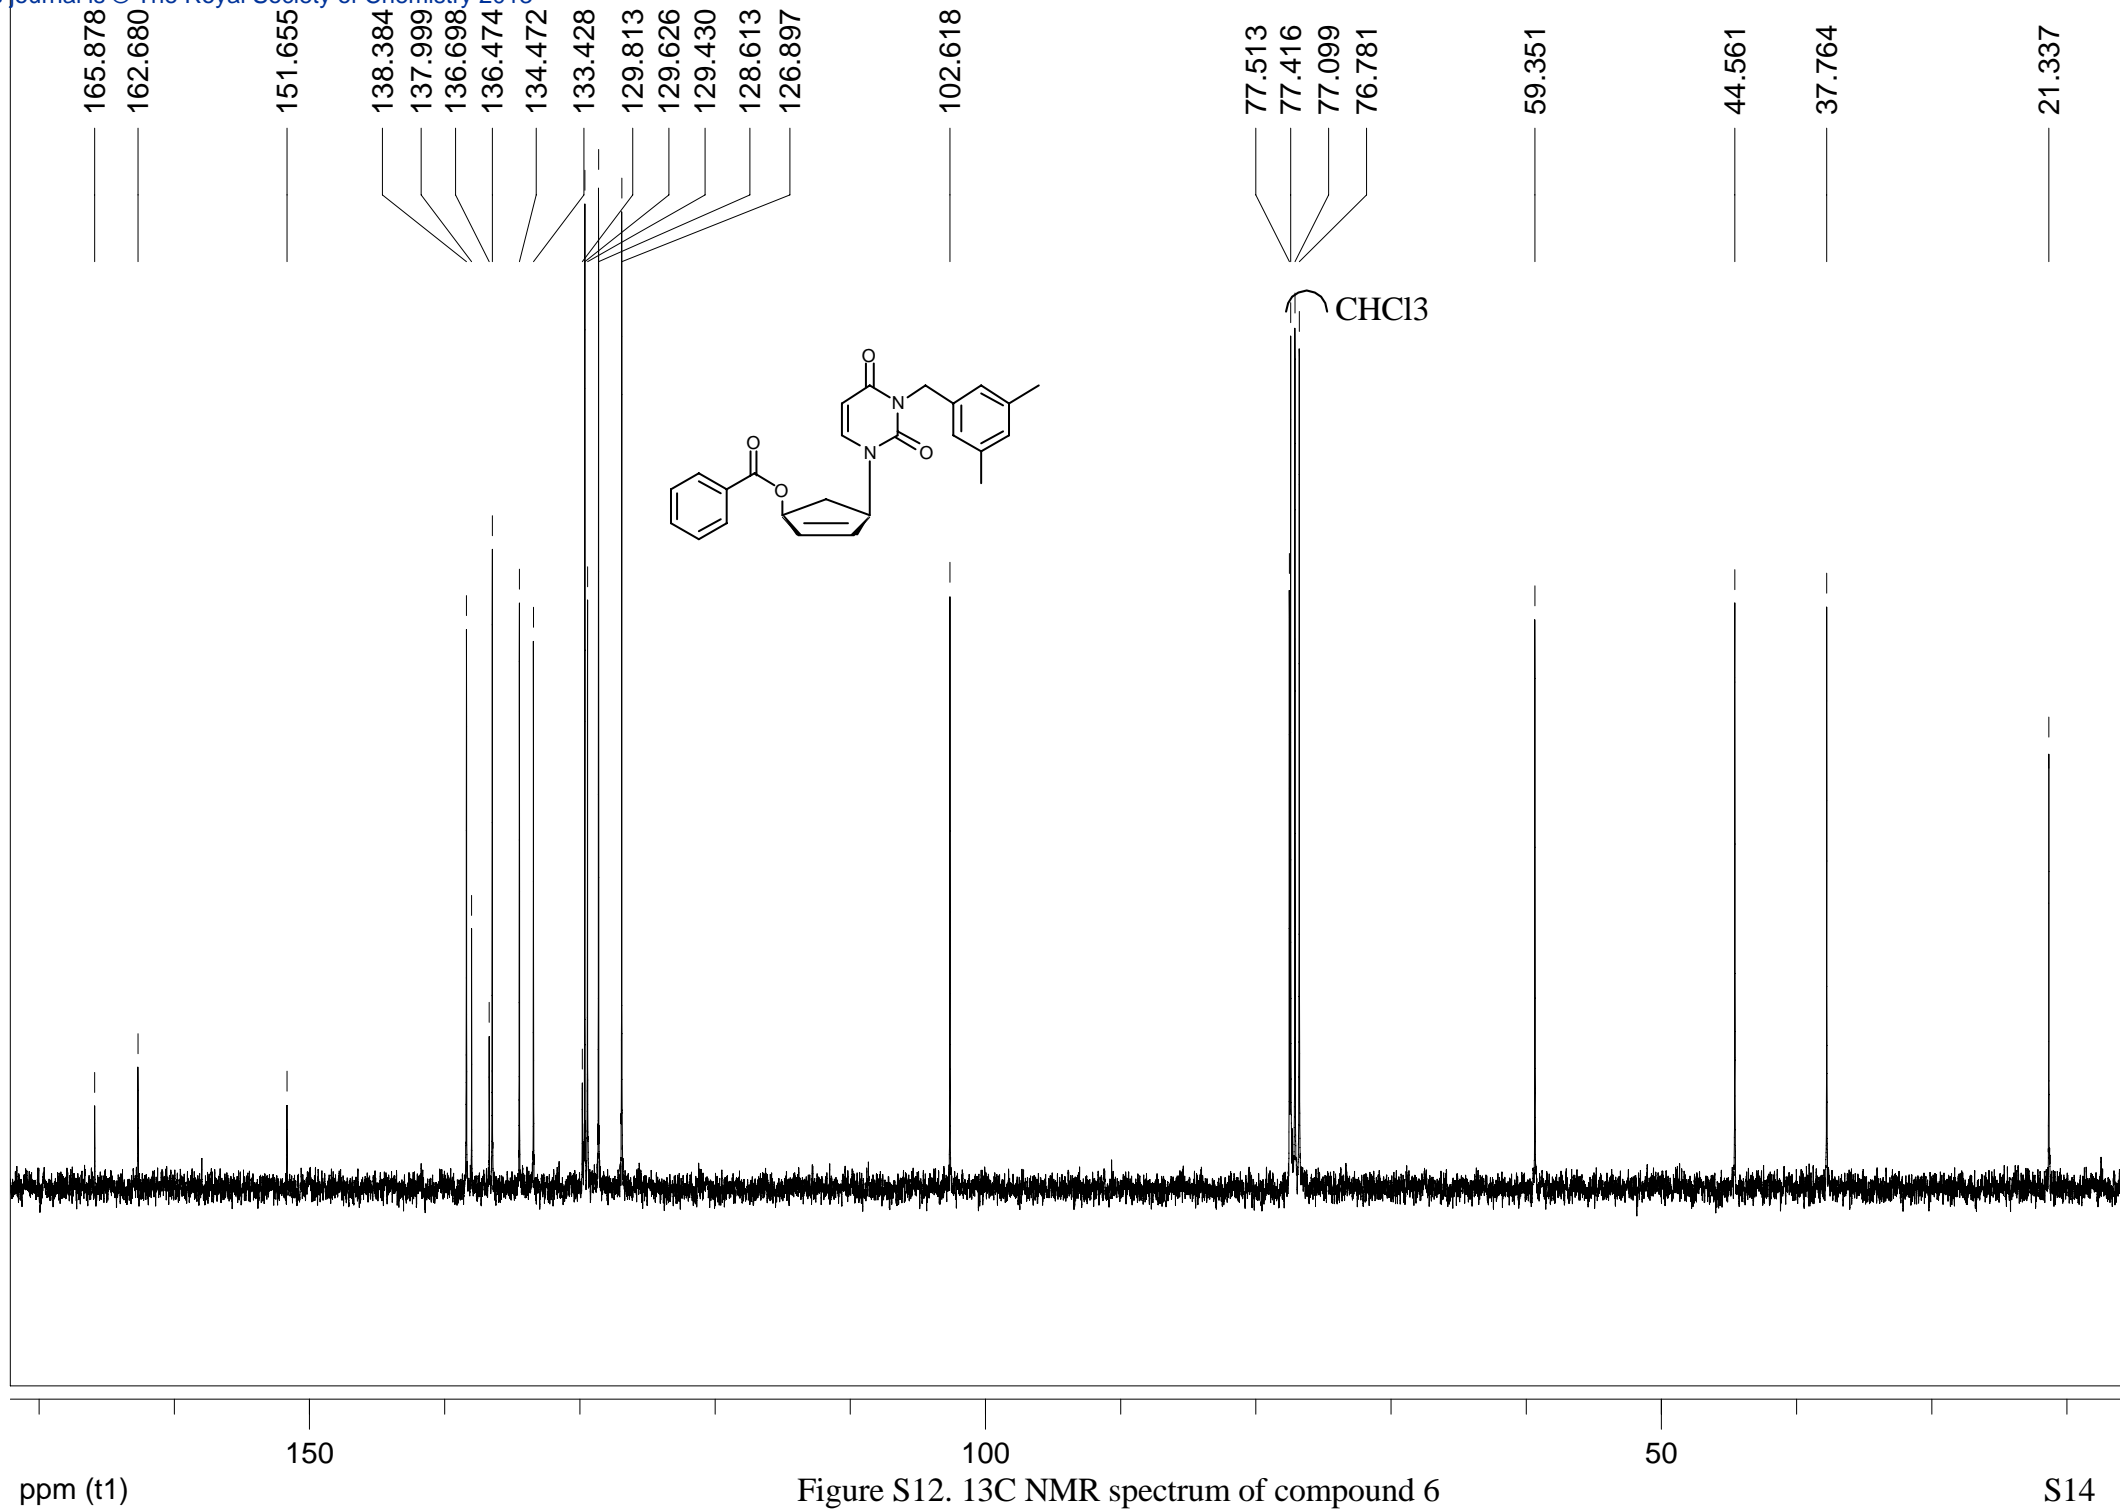

Figure S12. <sup>13</sup>C NMR spectrum of compound 6

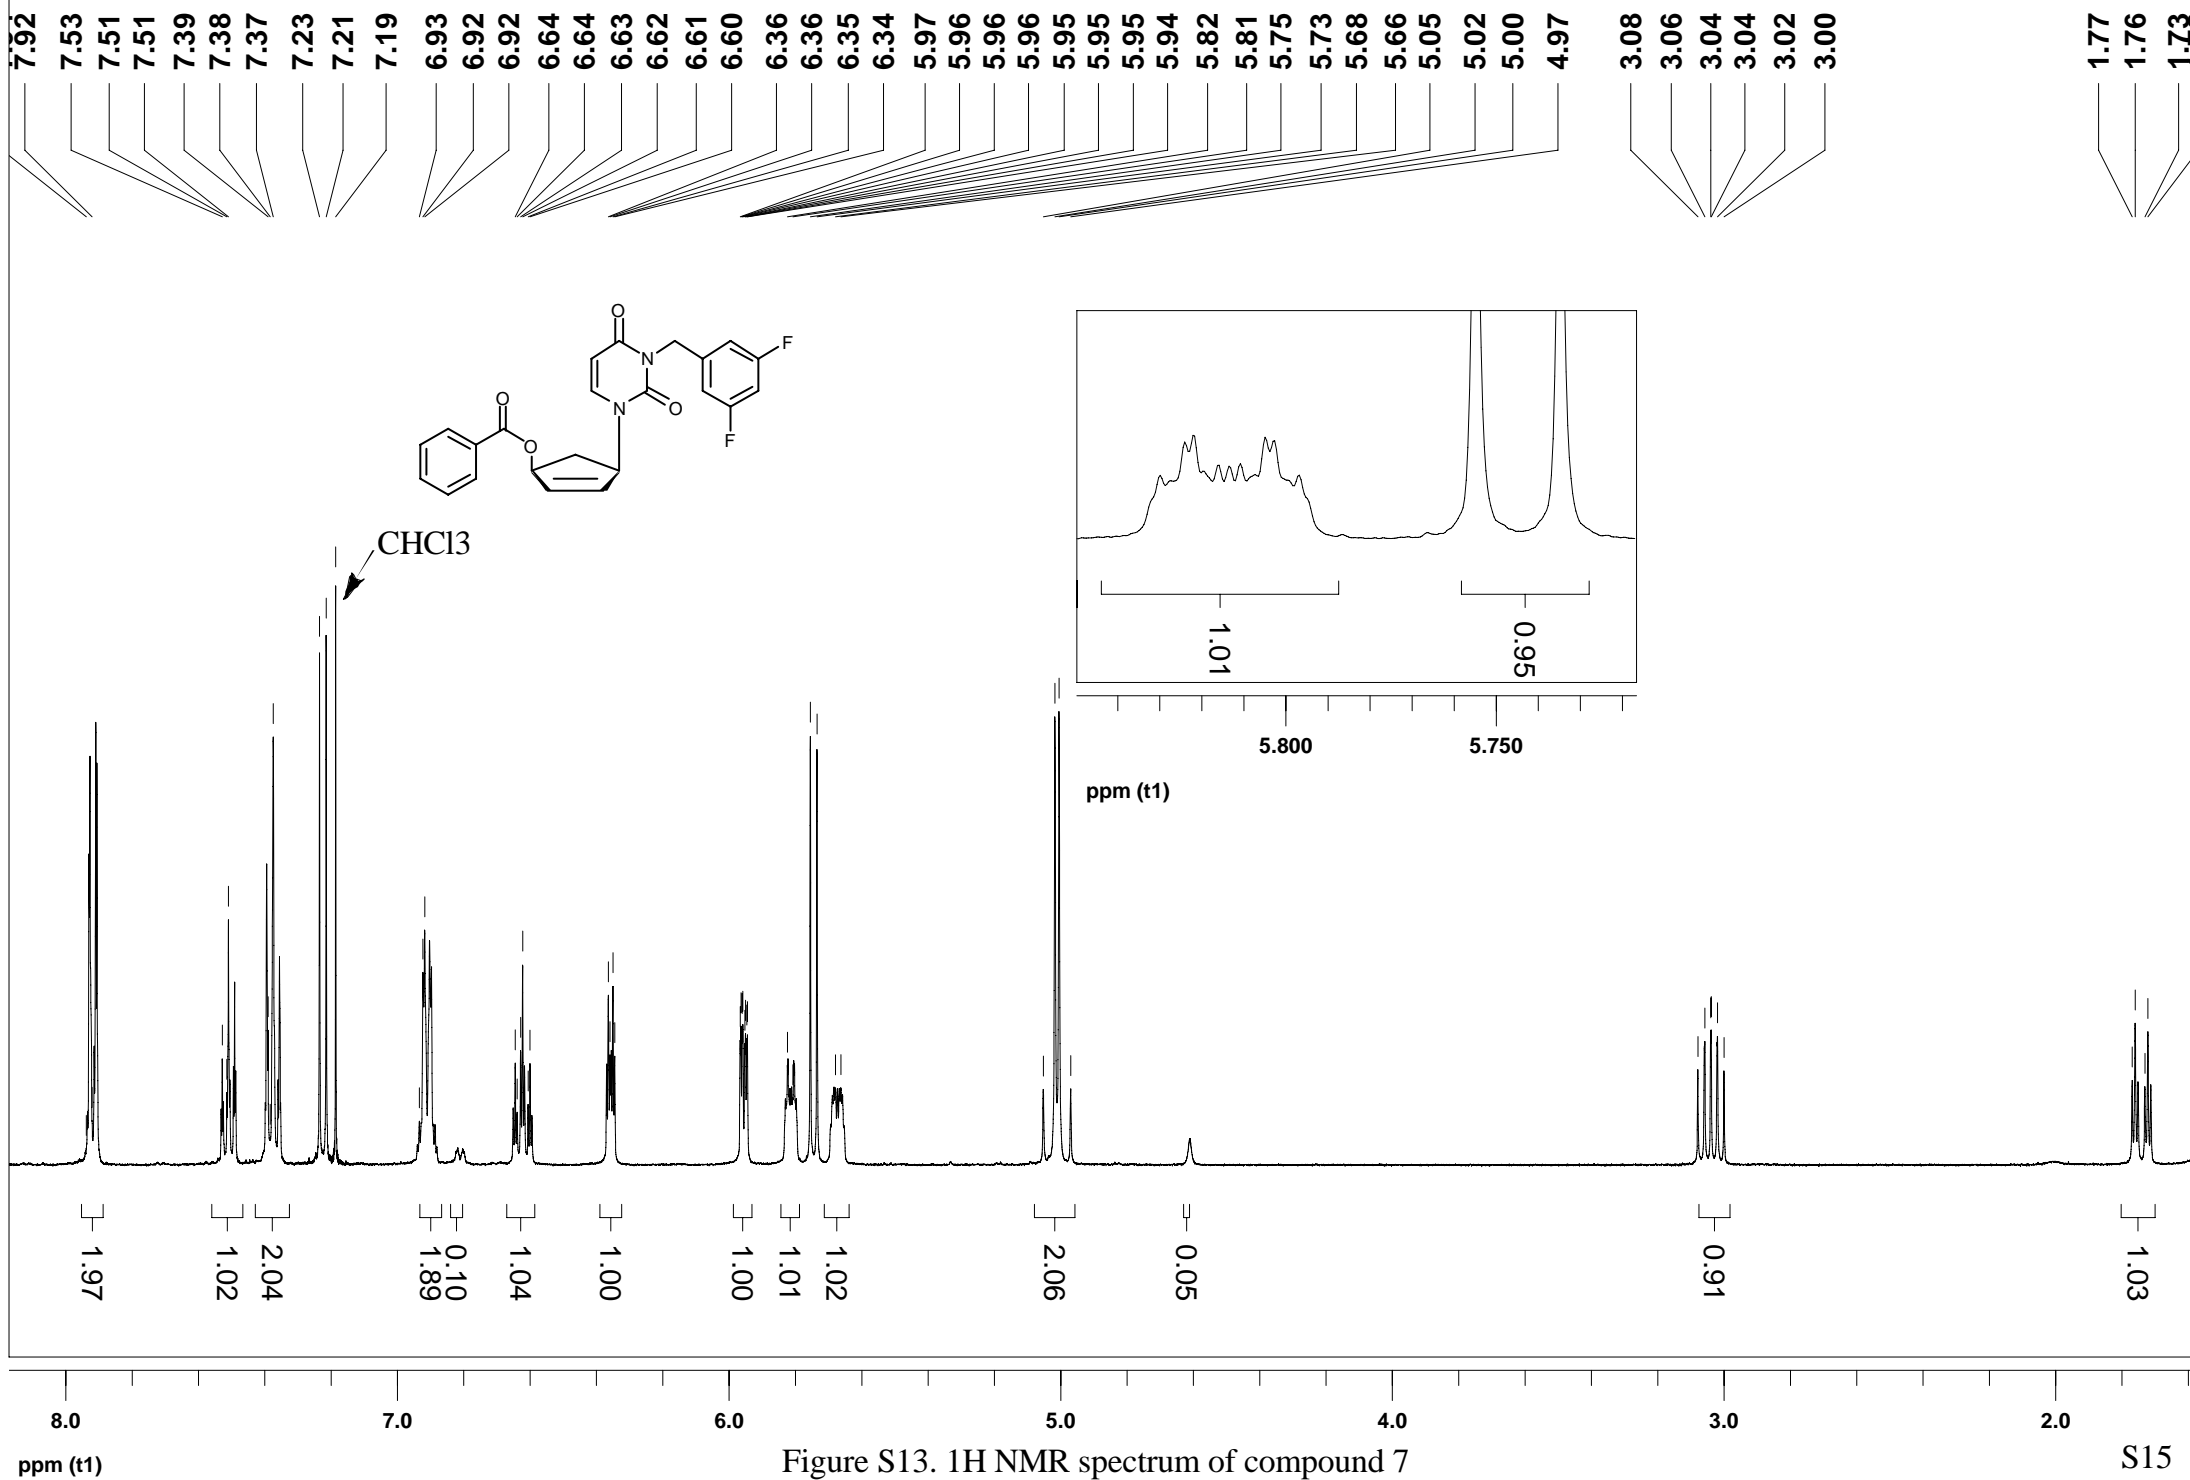

Figure S13. <sup>1</sup>H NMR spectrum of compound 7

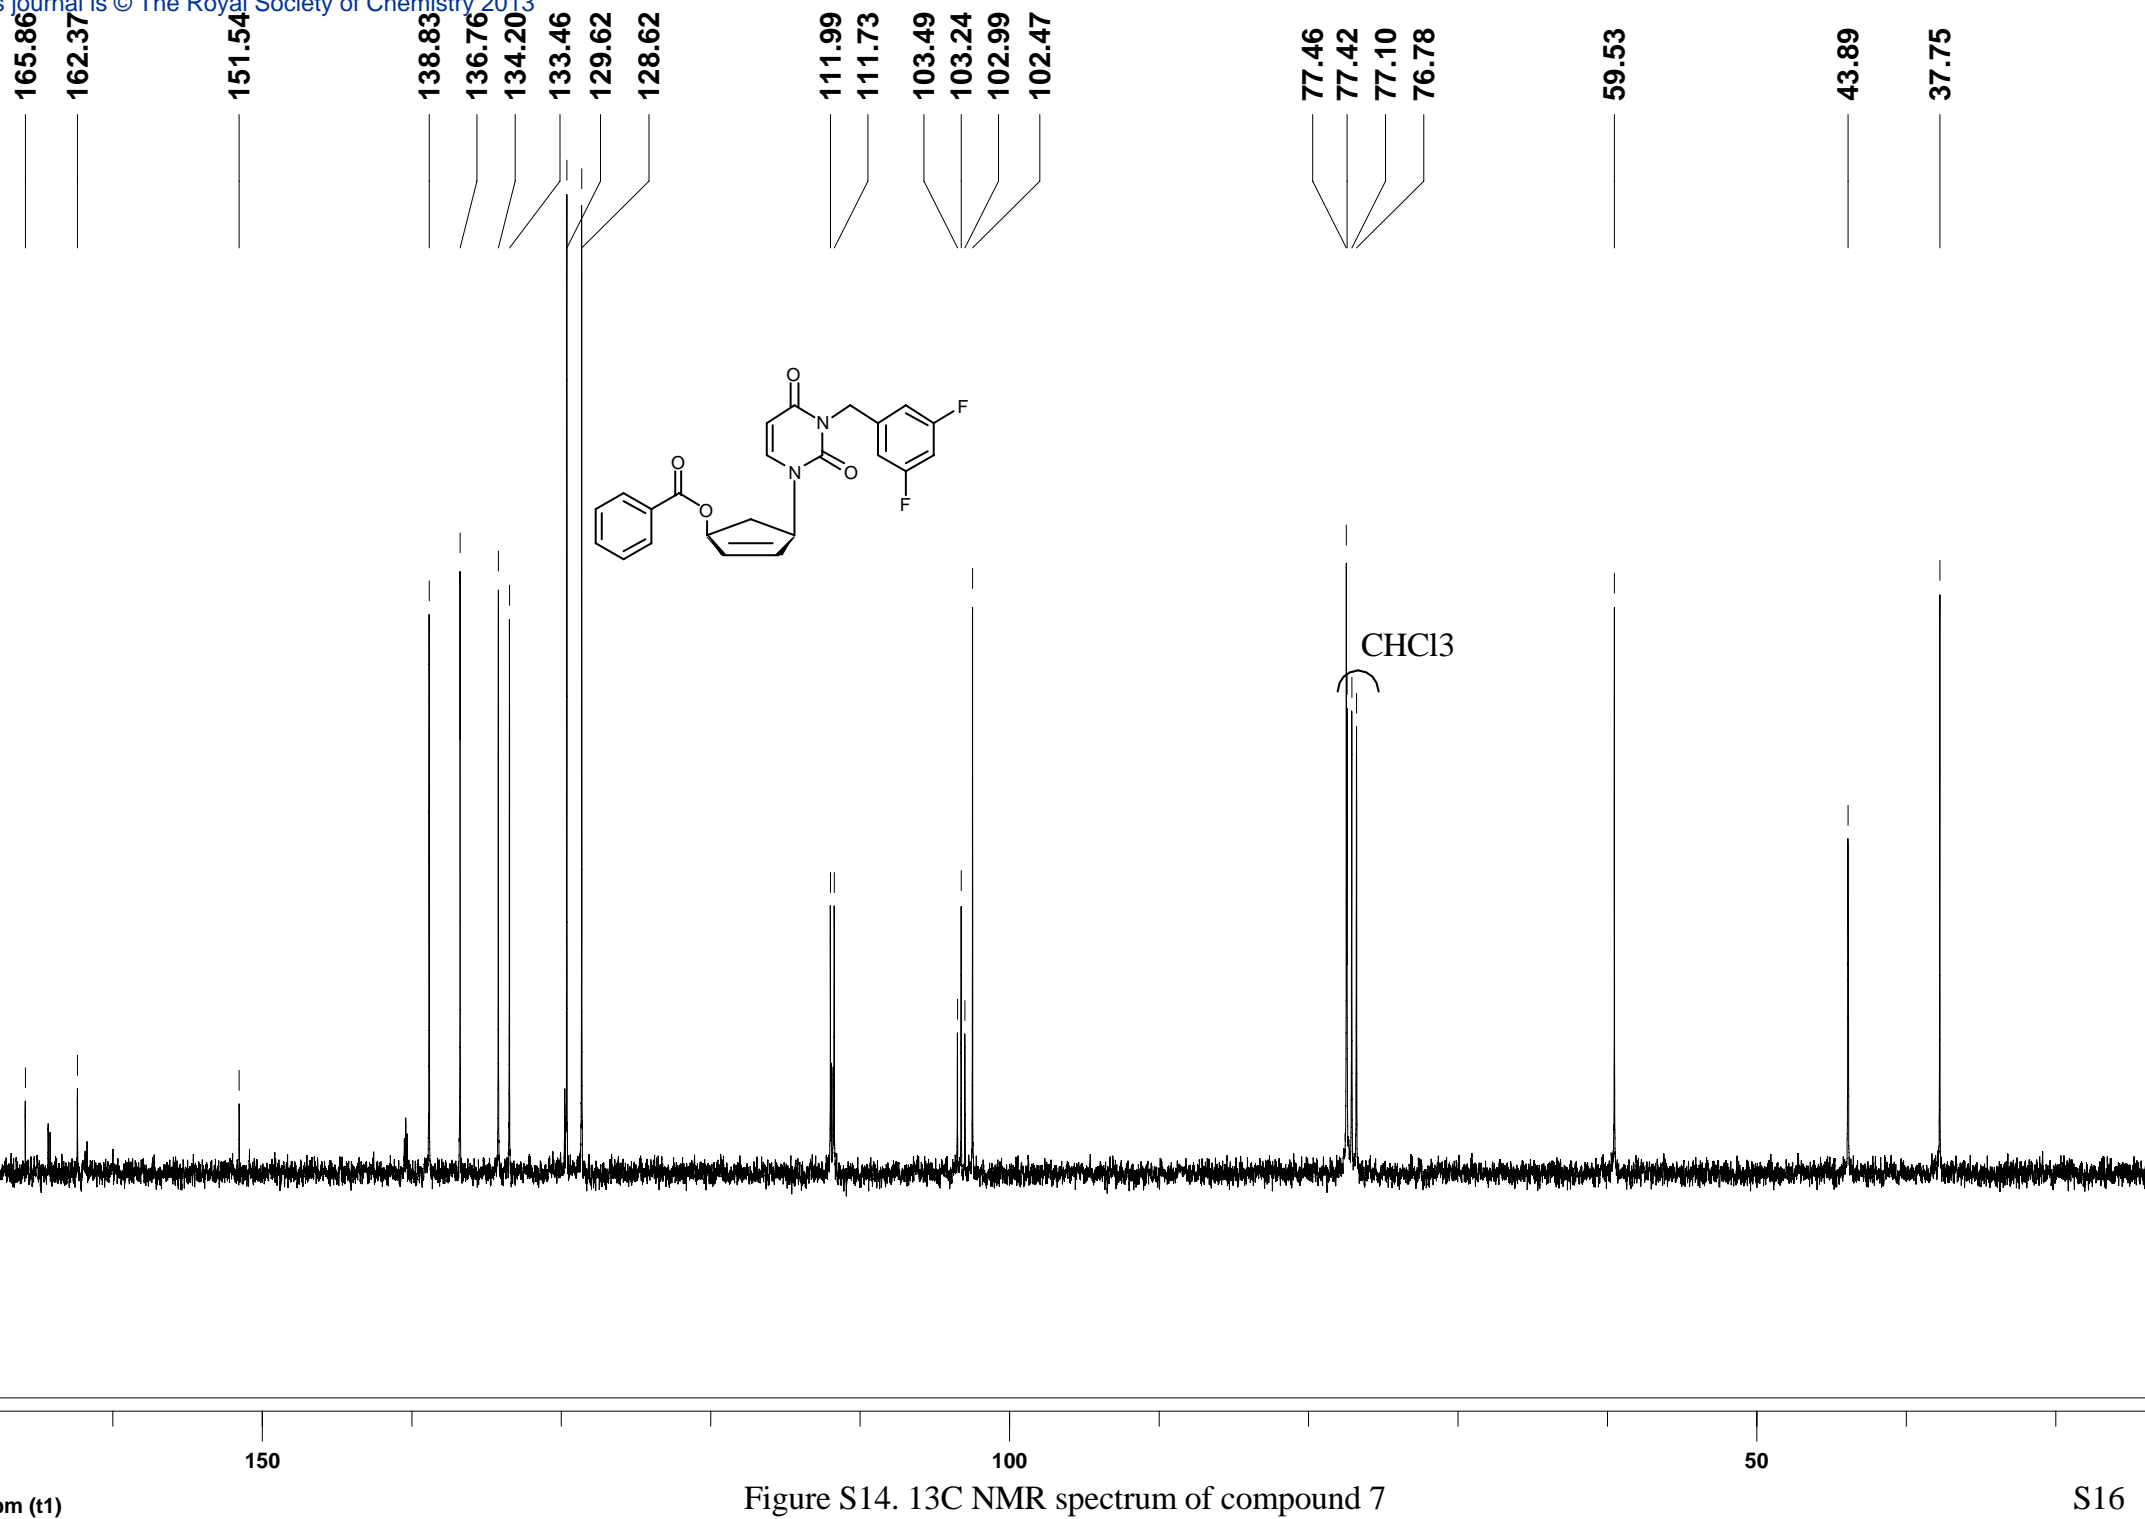

Figure S14. <sup>13</sup>C NMR spectrum of compound 7



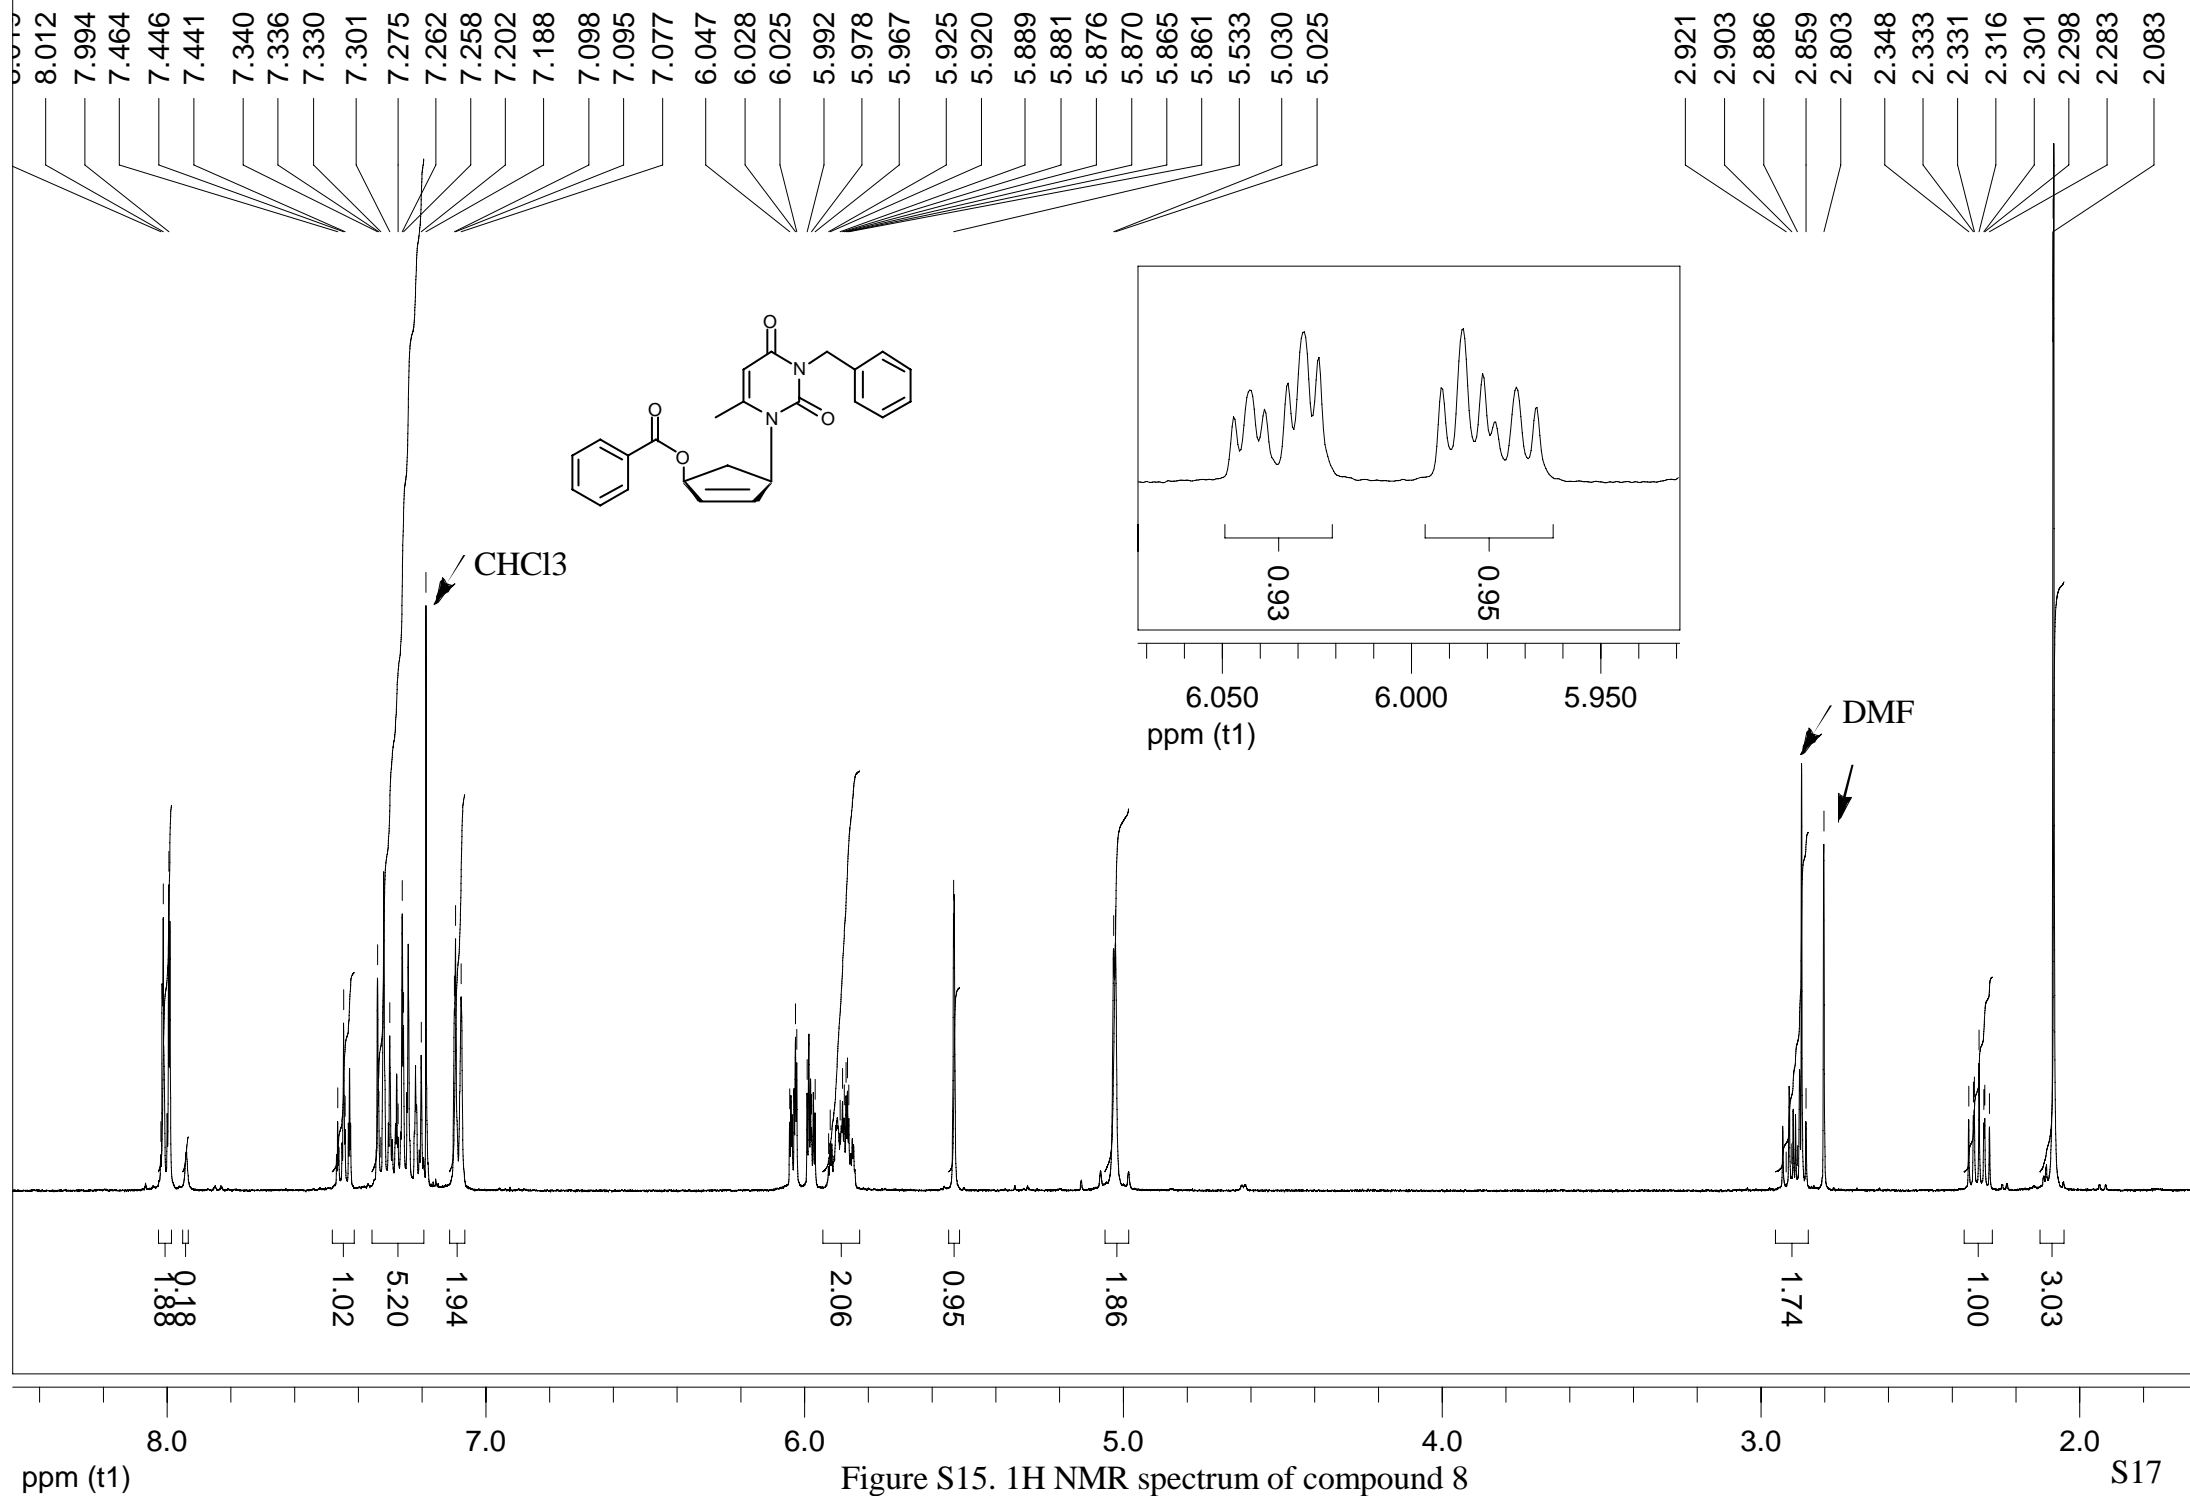

Figure S15. <sup>1</sup>H NMR spectrum of compound 8

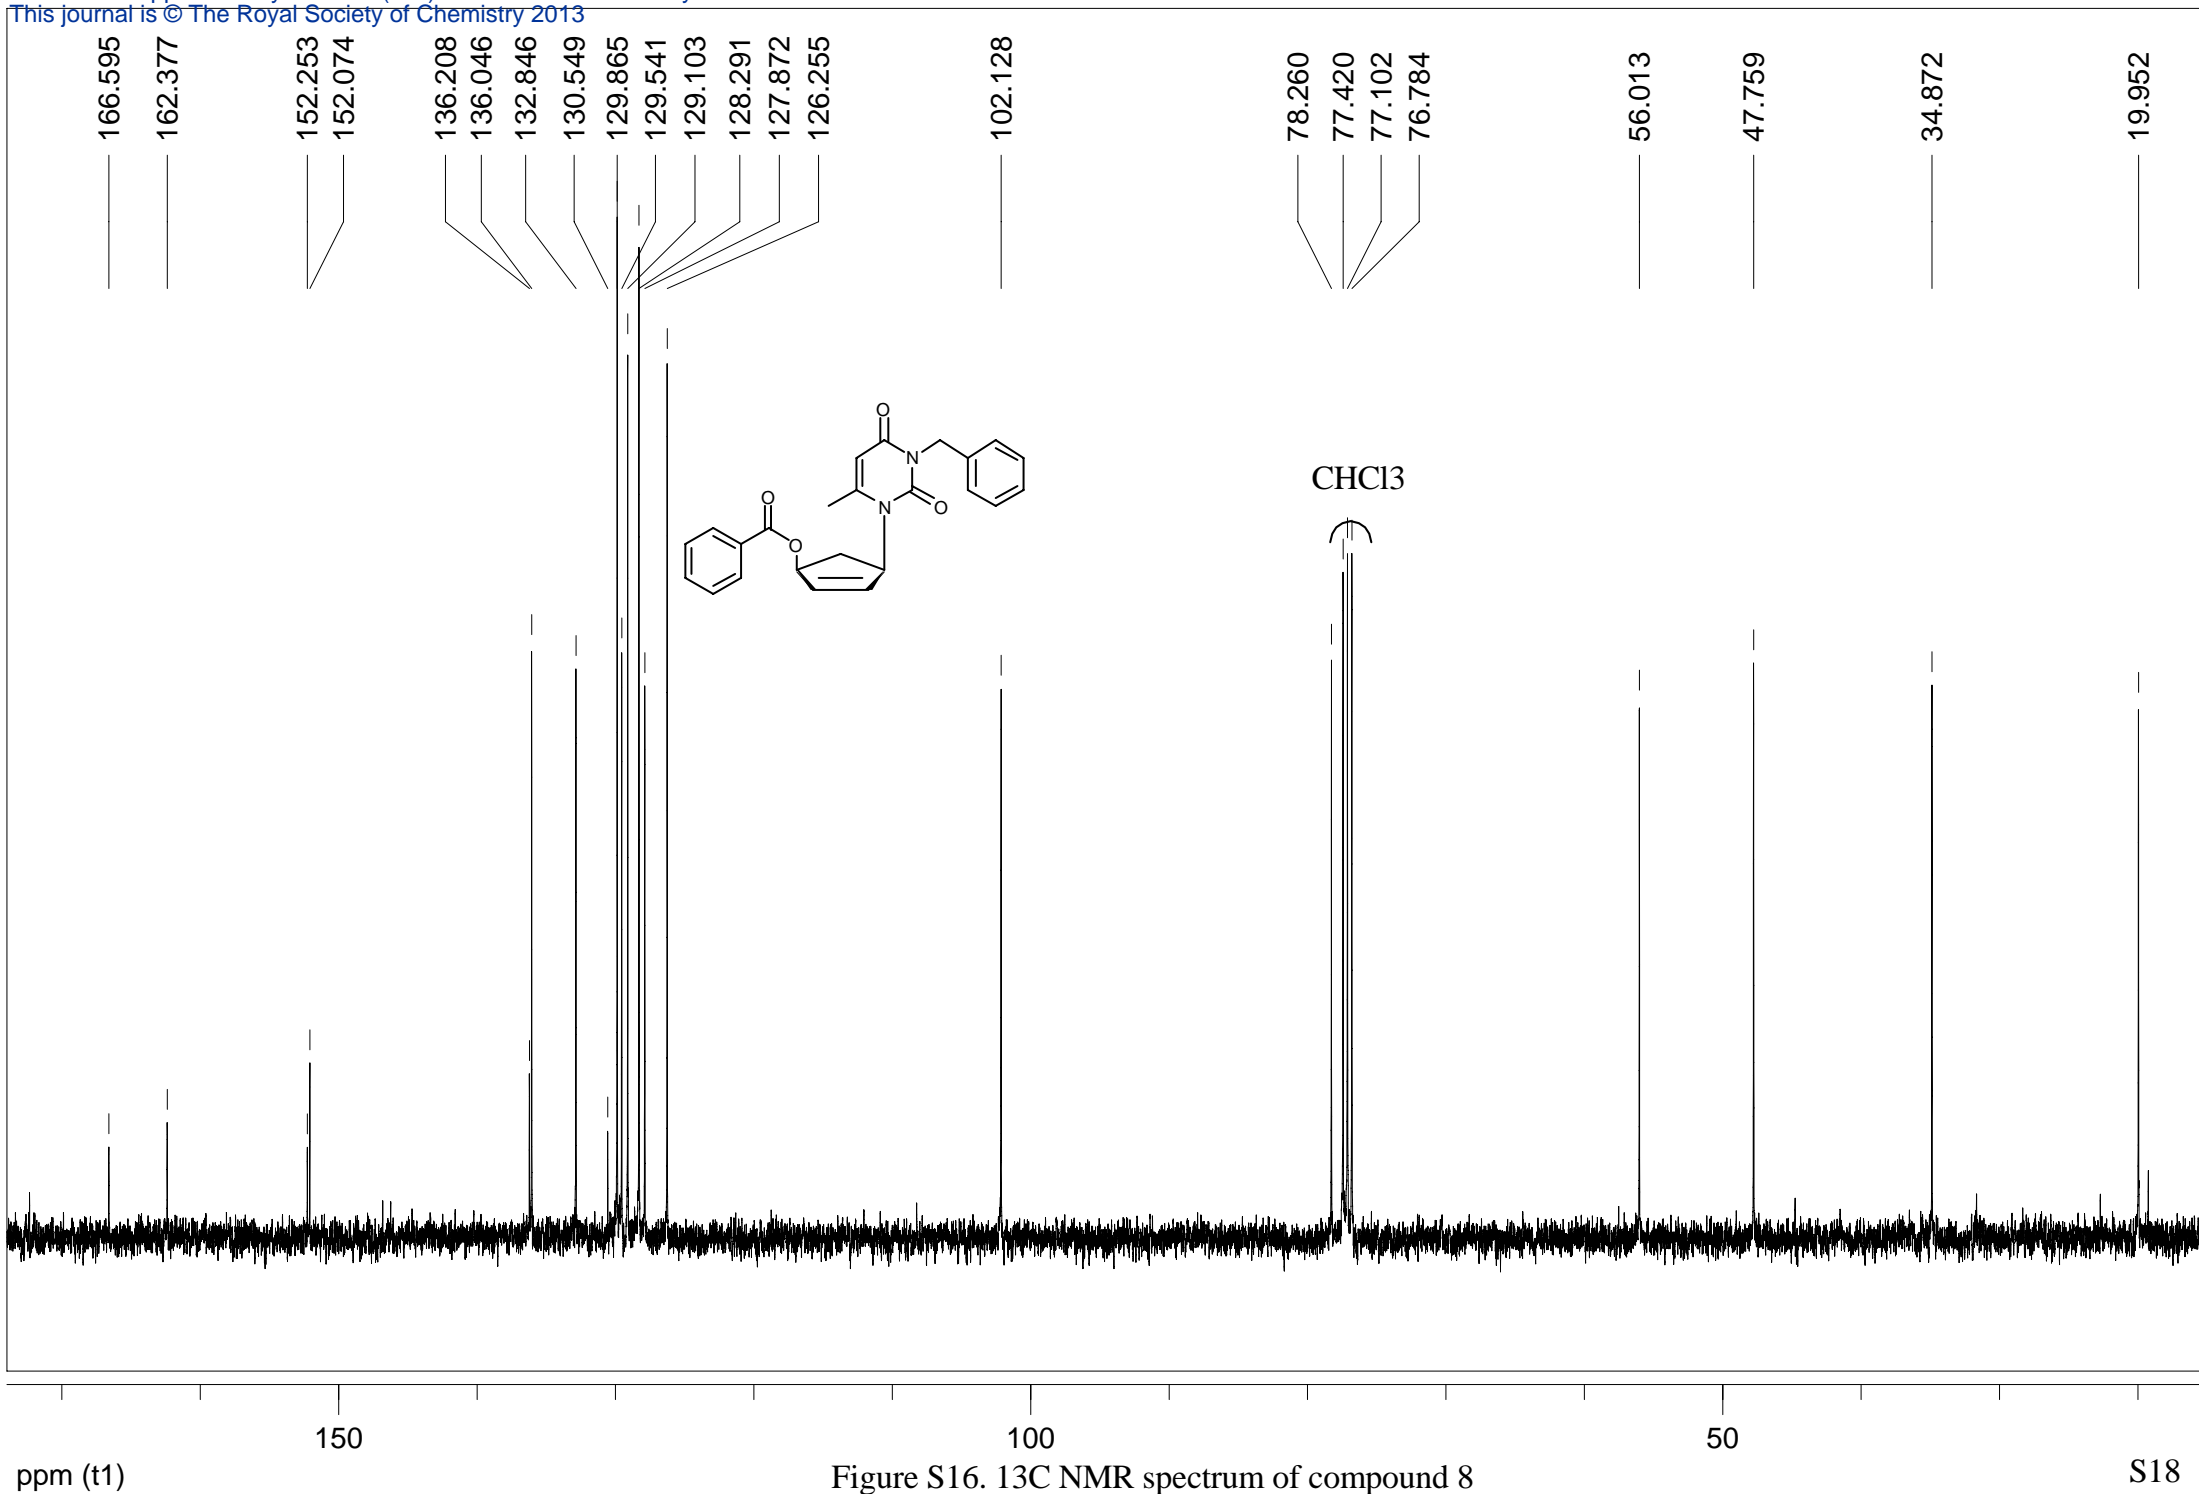

Figure S16. <sup>13</sup>C NMR spectrum of compound 8

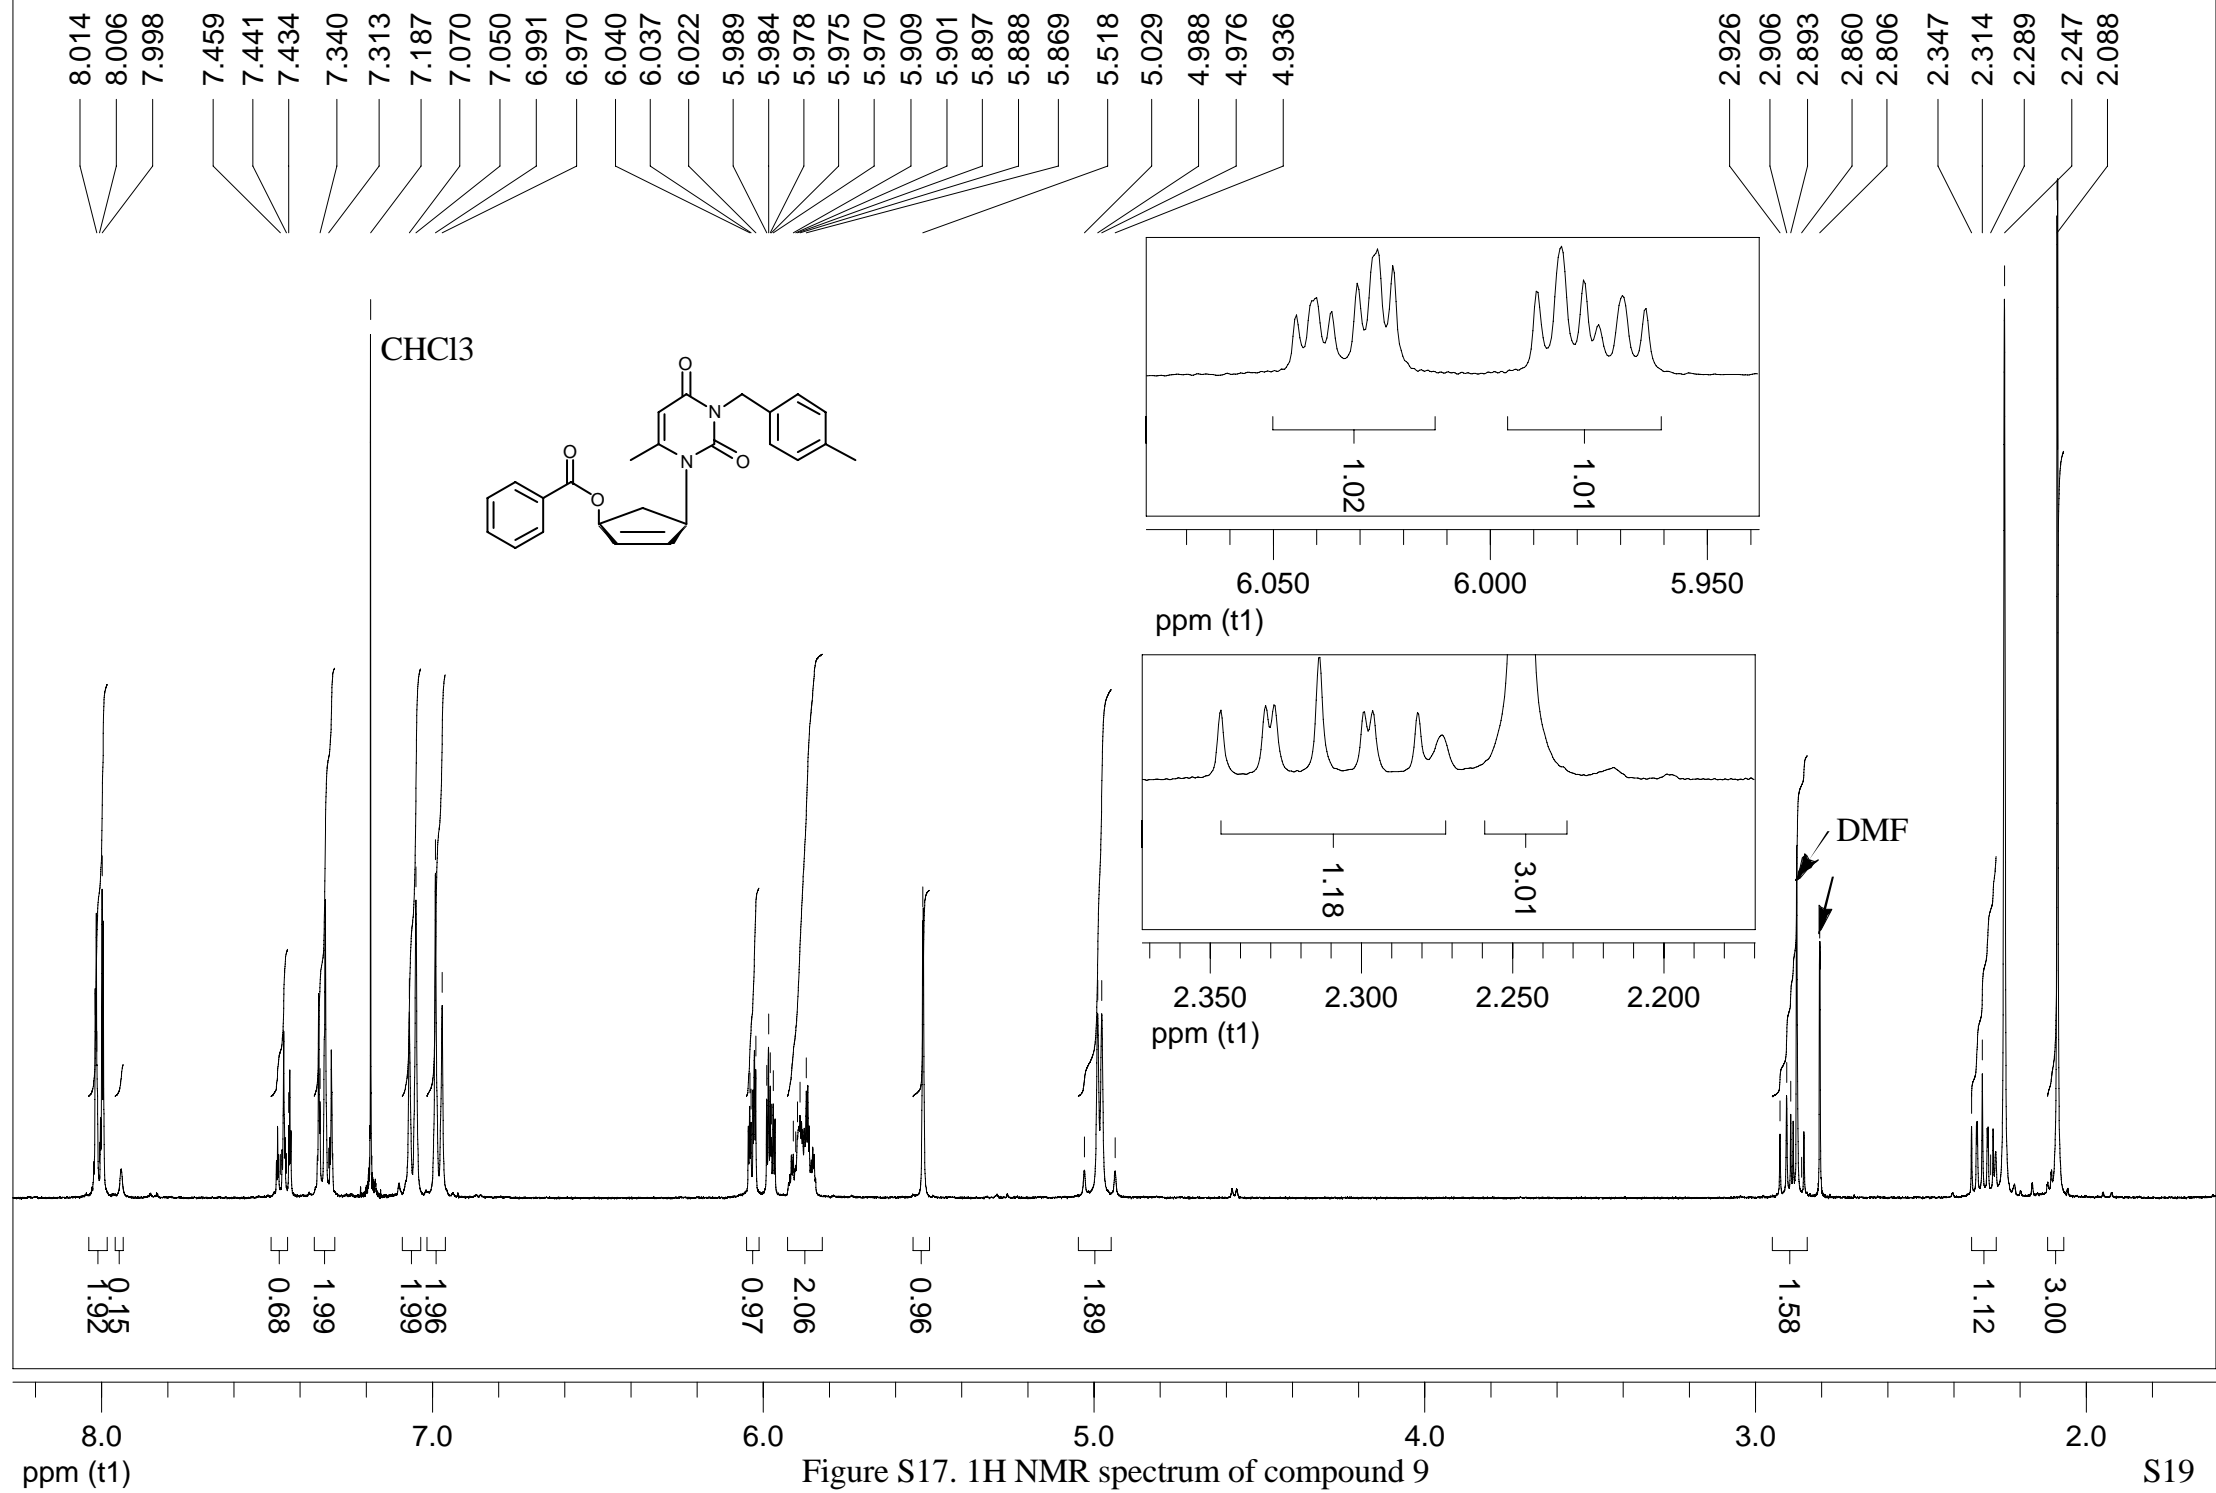

Figure S17. <sup>1</sup>H NMR spectrum of compound 9

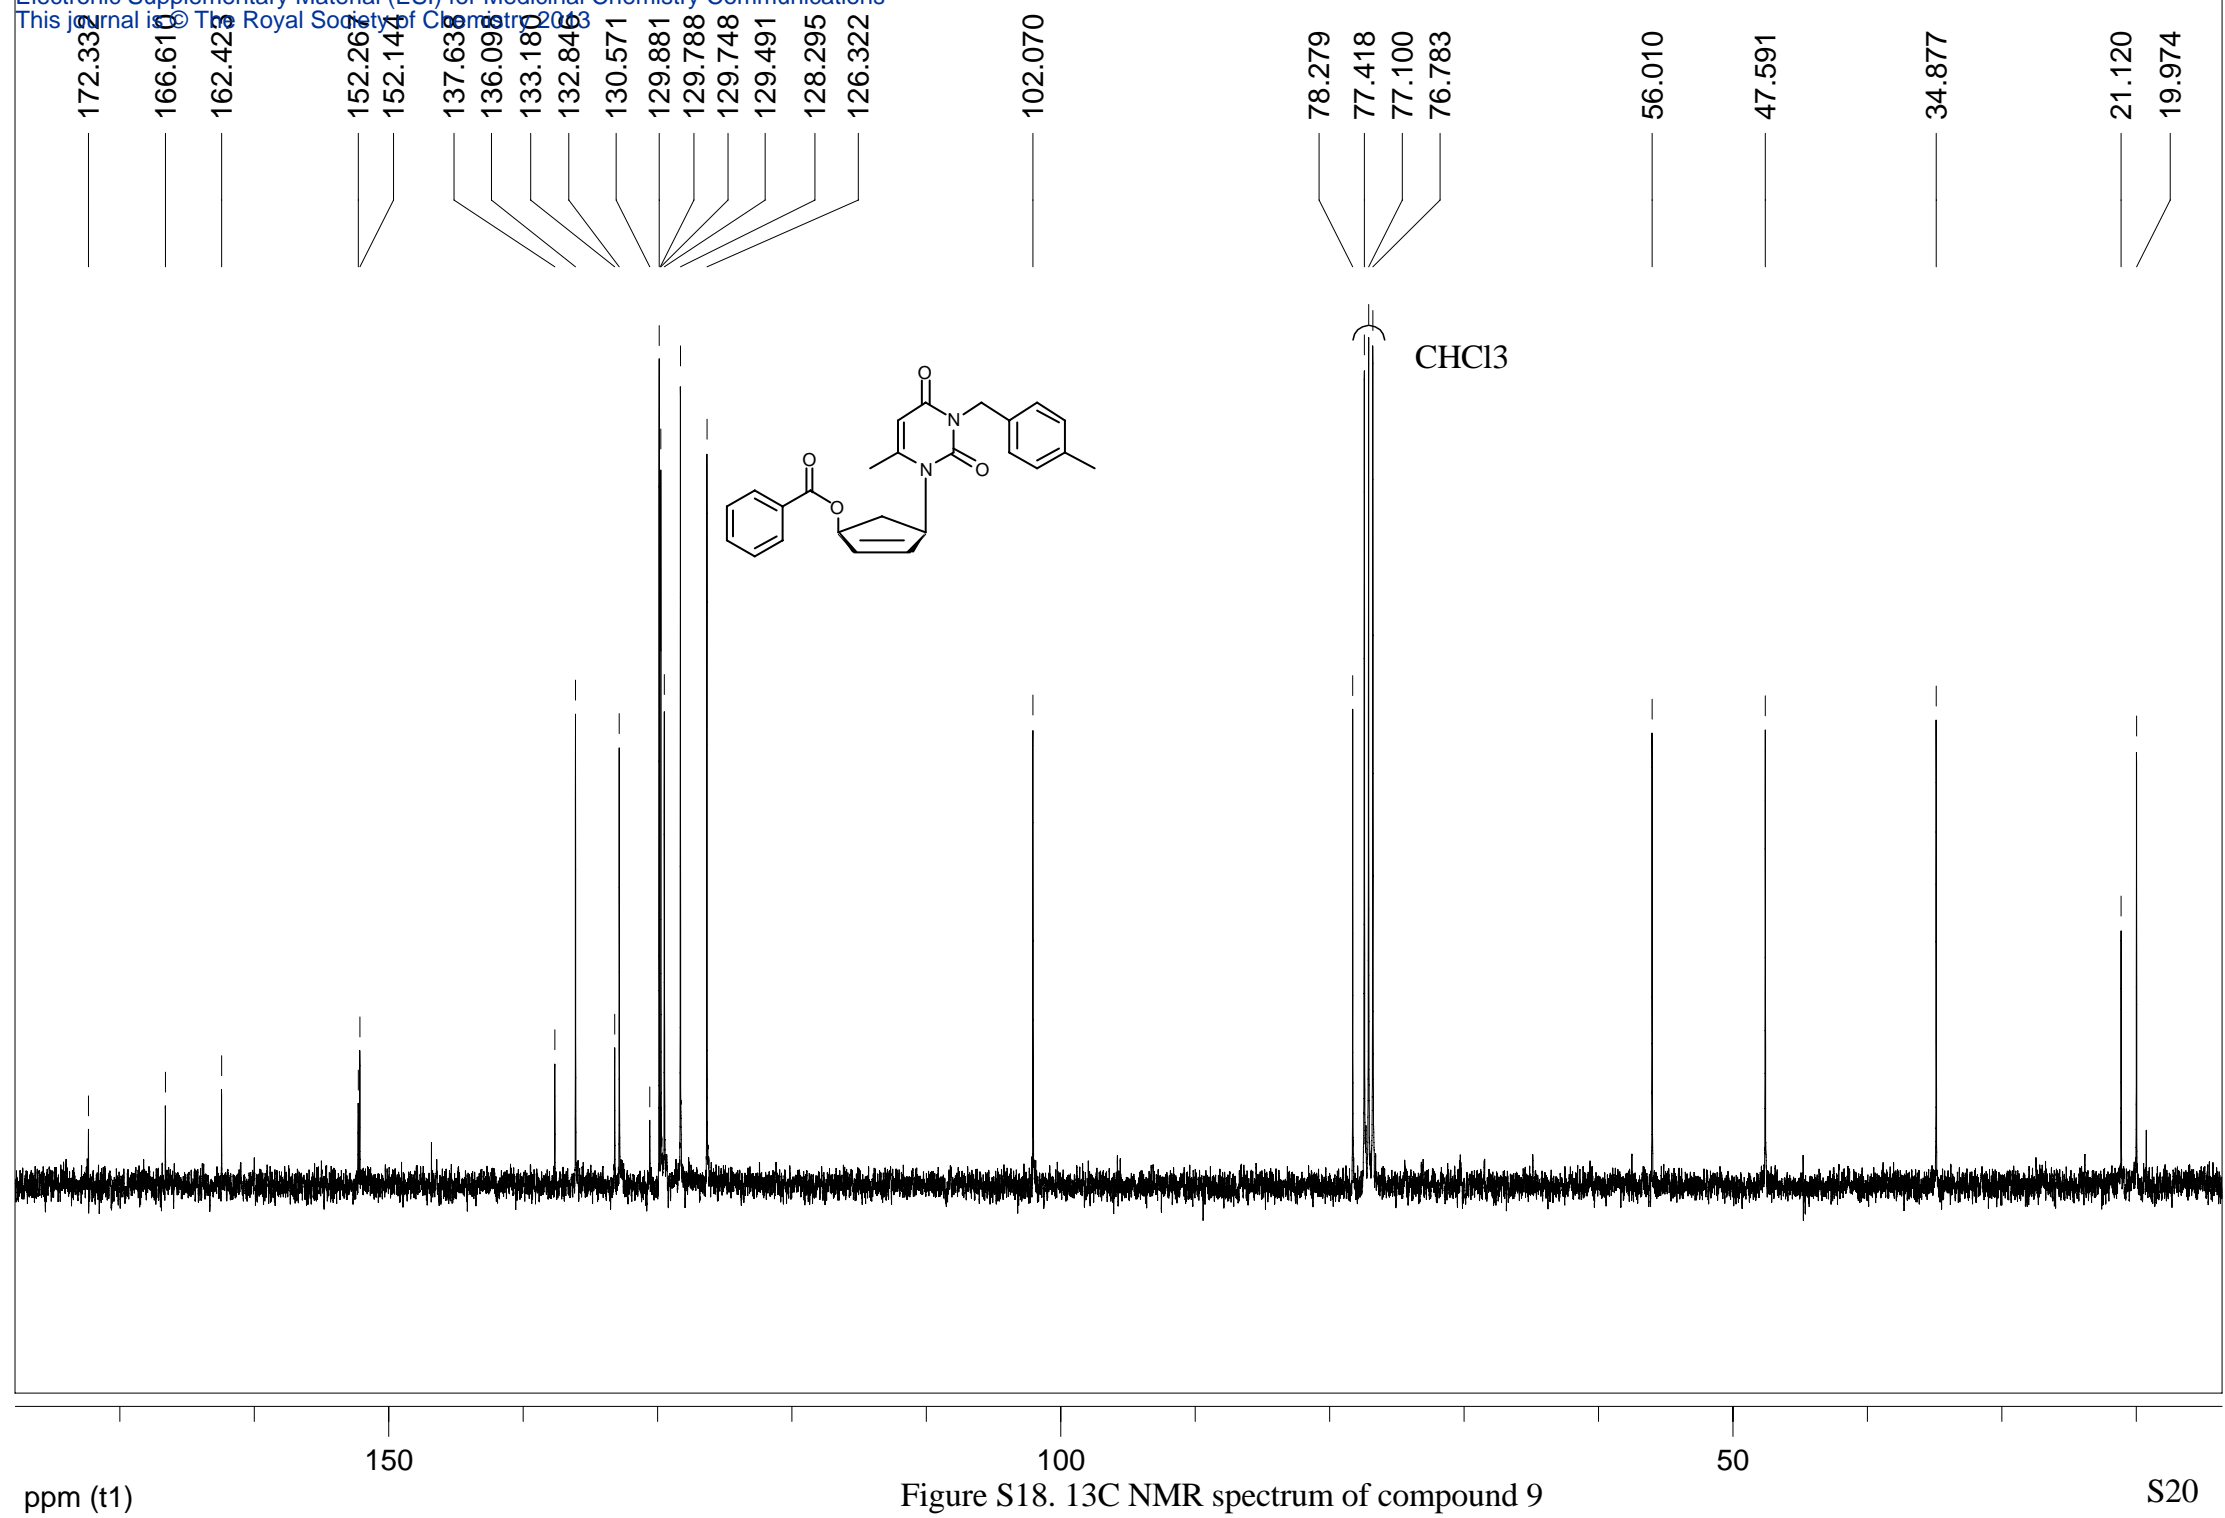

Figure S18. <sup>13</sup>C NMR spectrum of compound 9

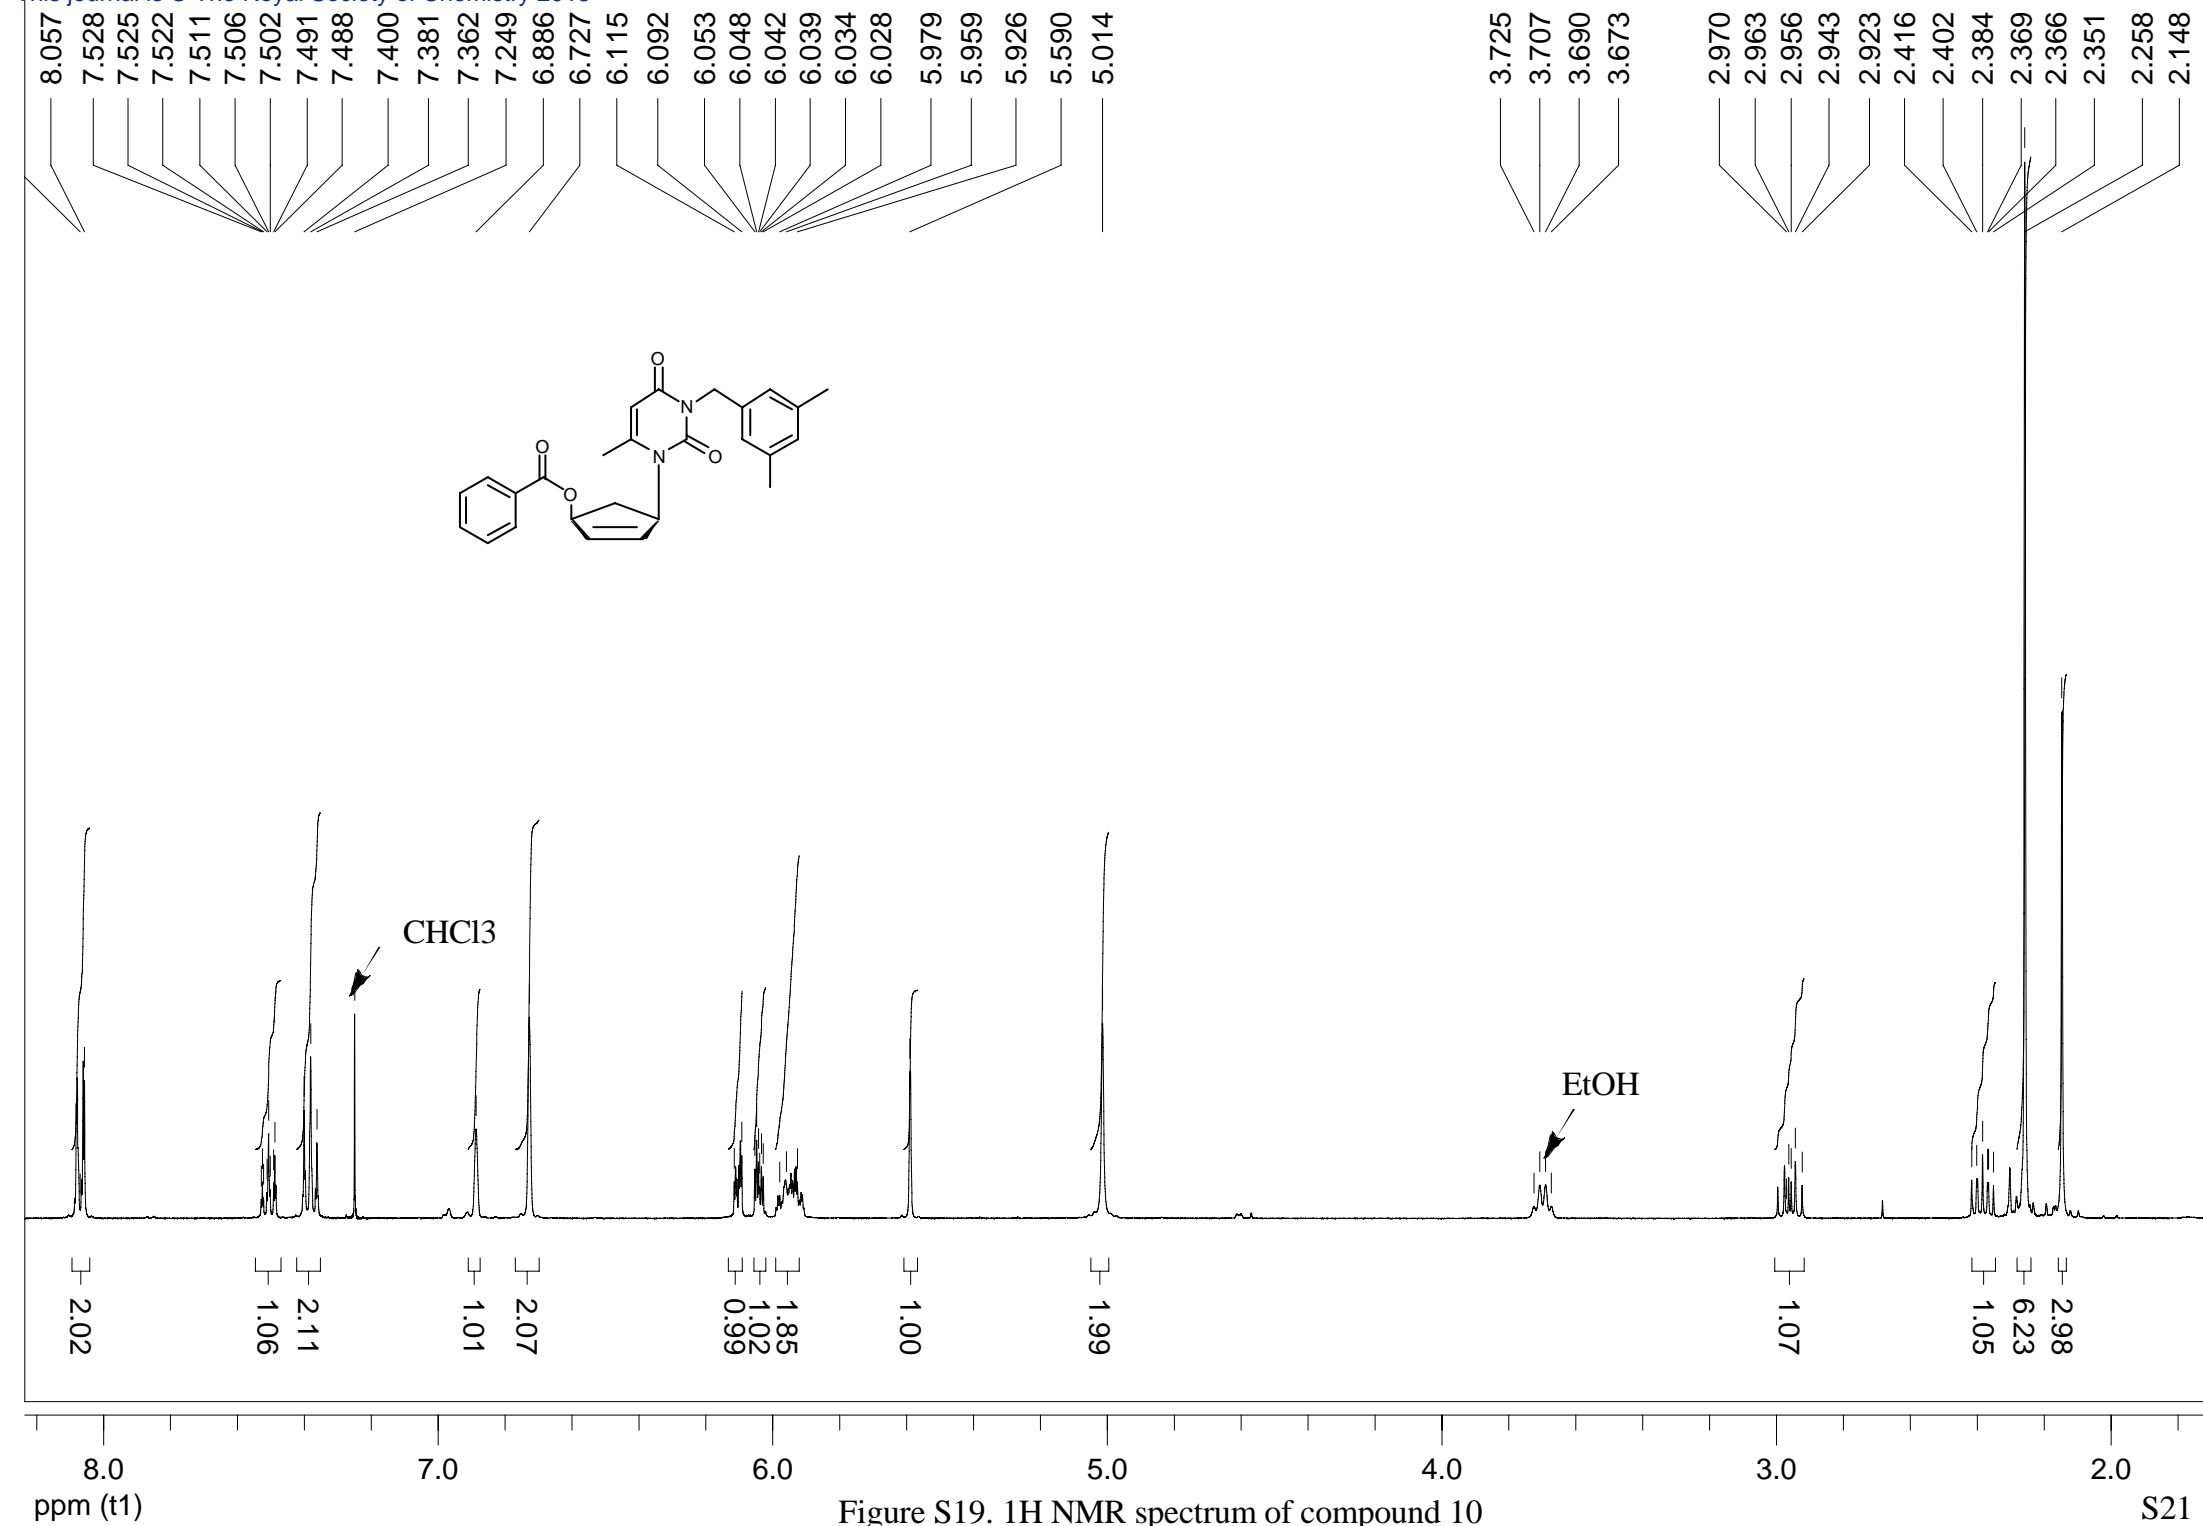

Figure S19. <sup>1</sup>H NMR spectrum of compound 10

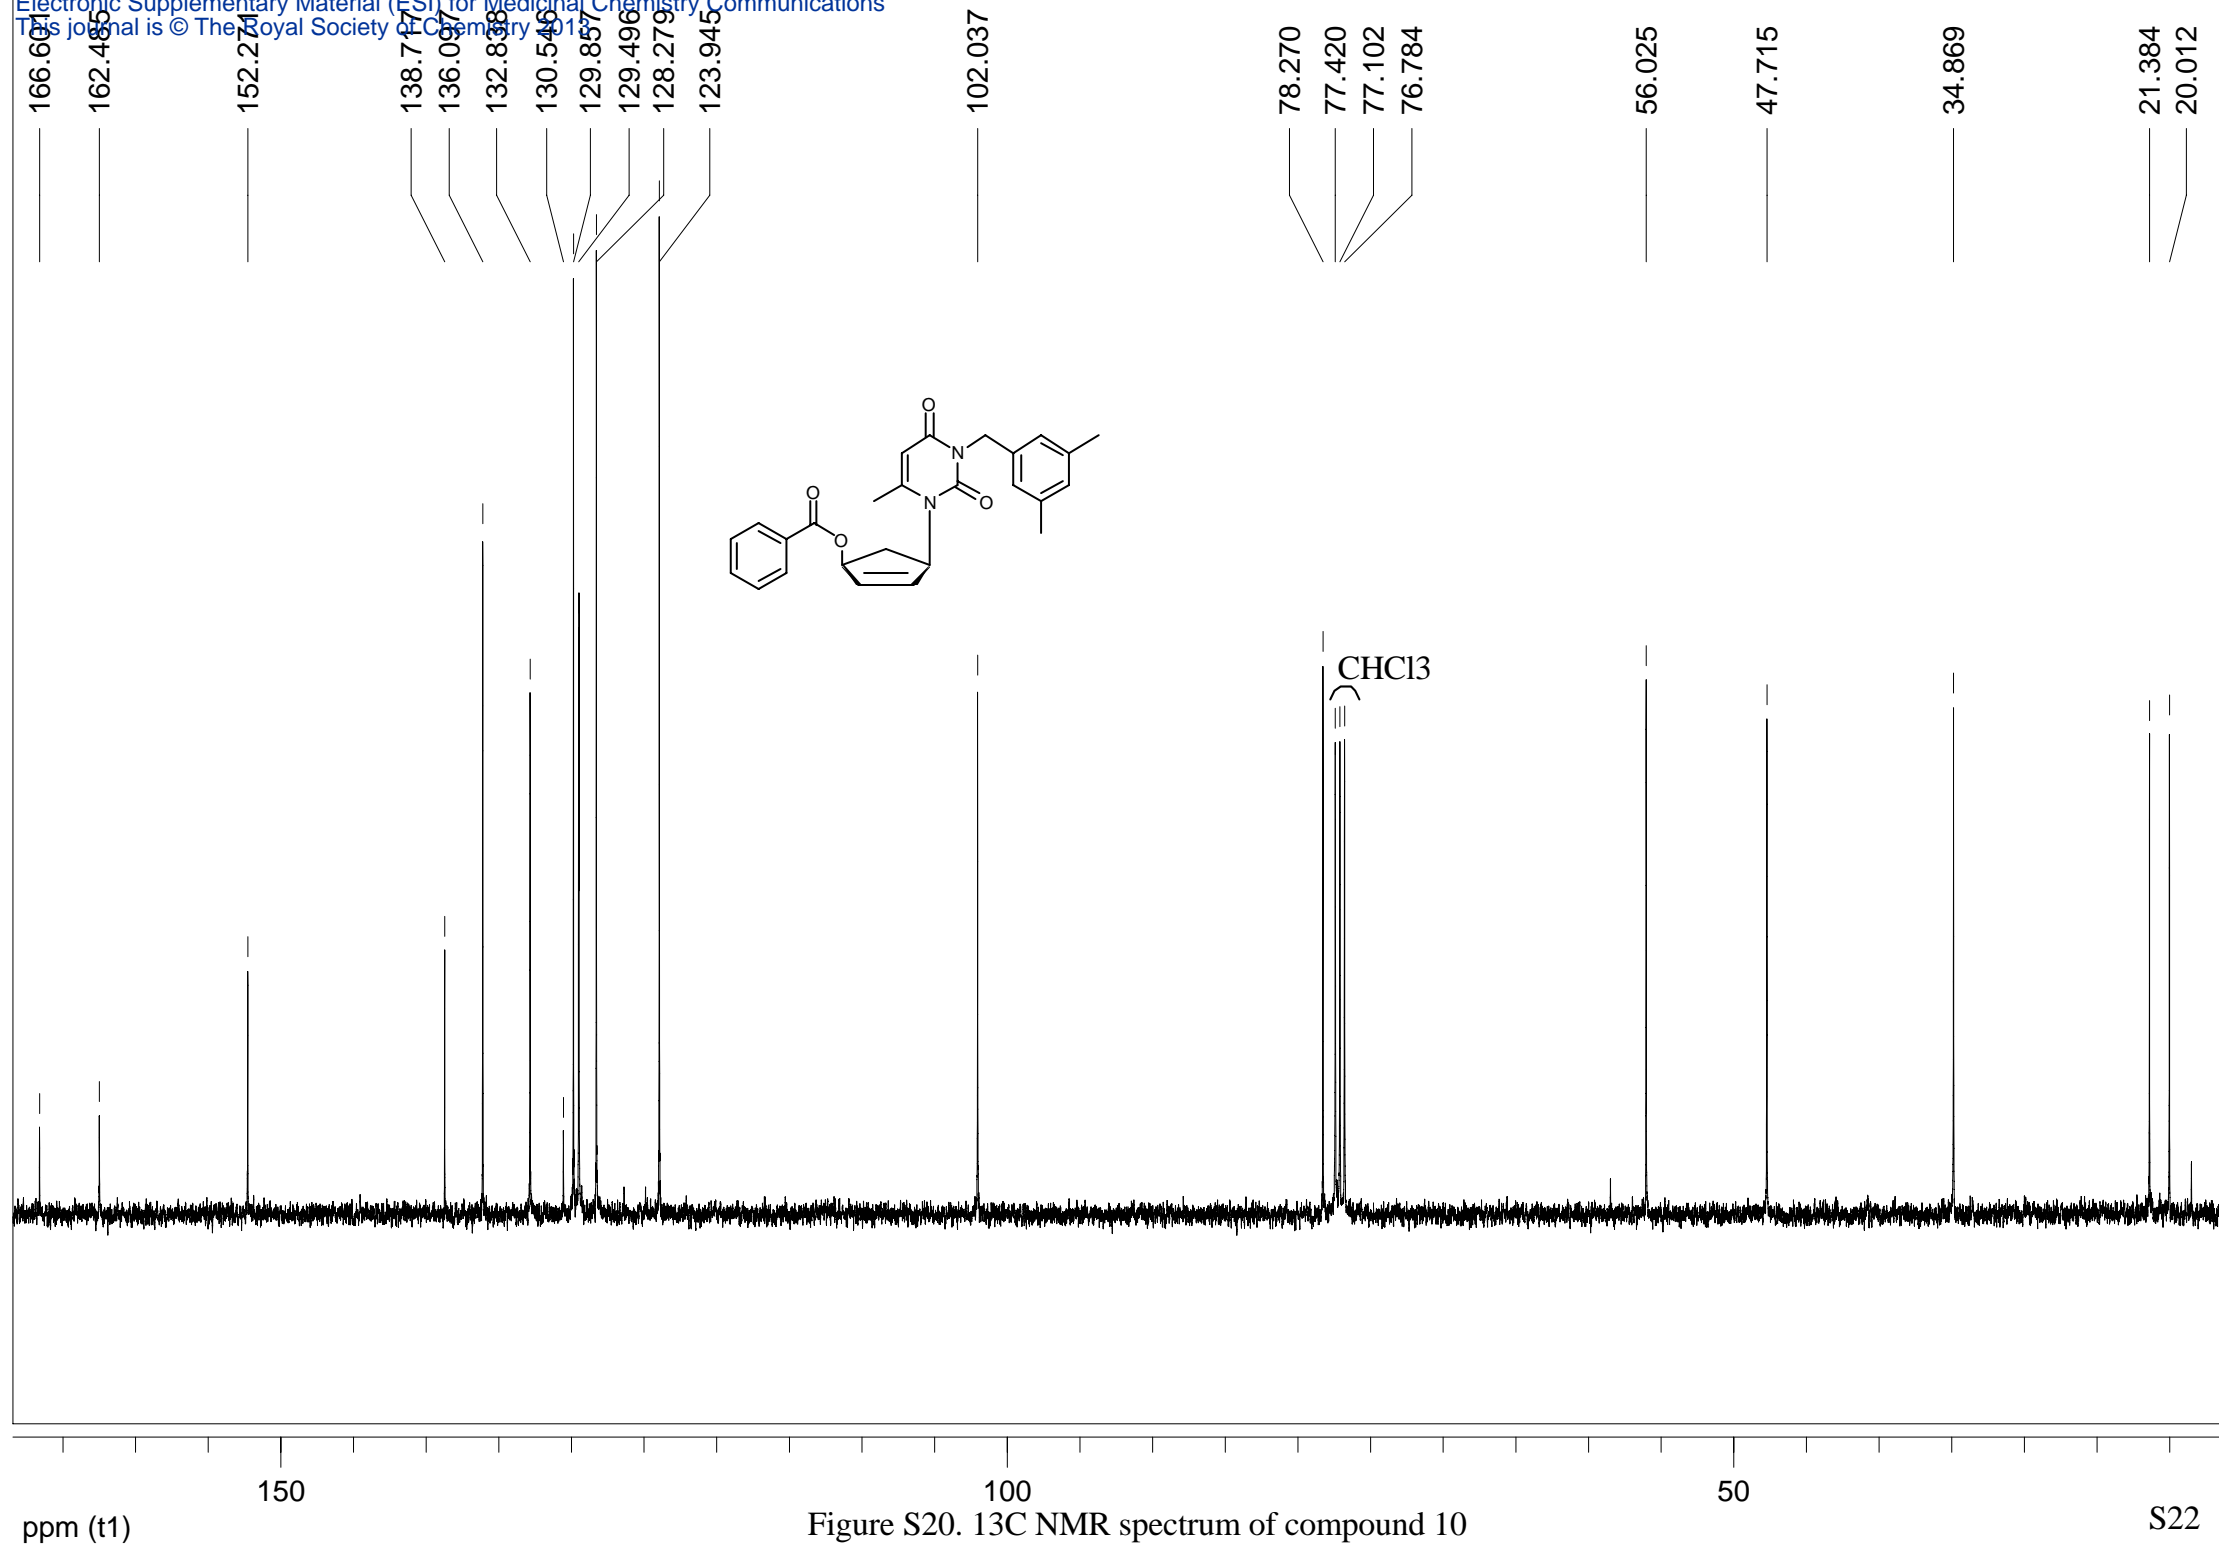

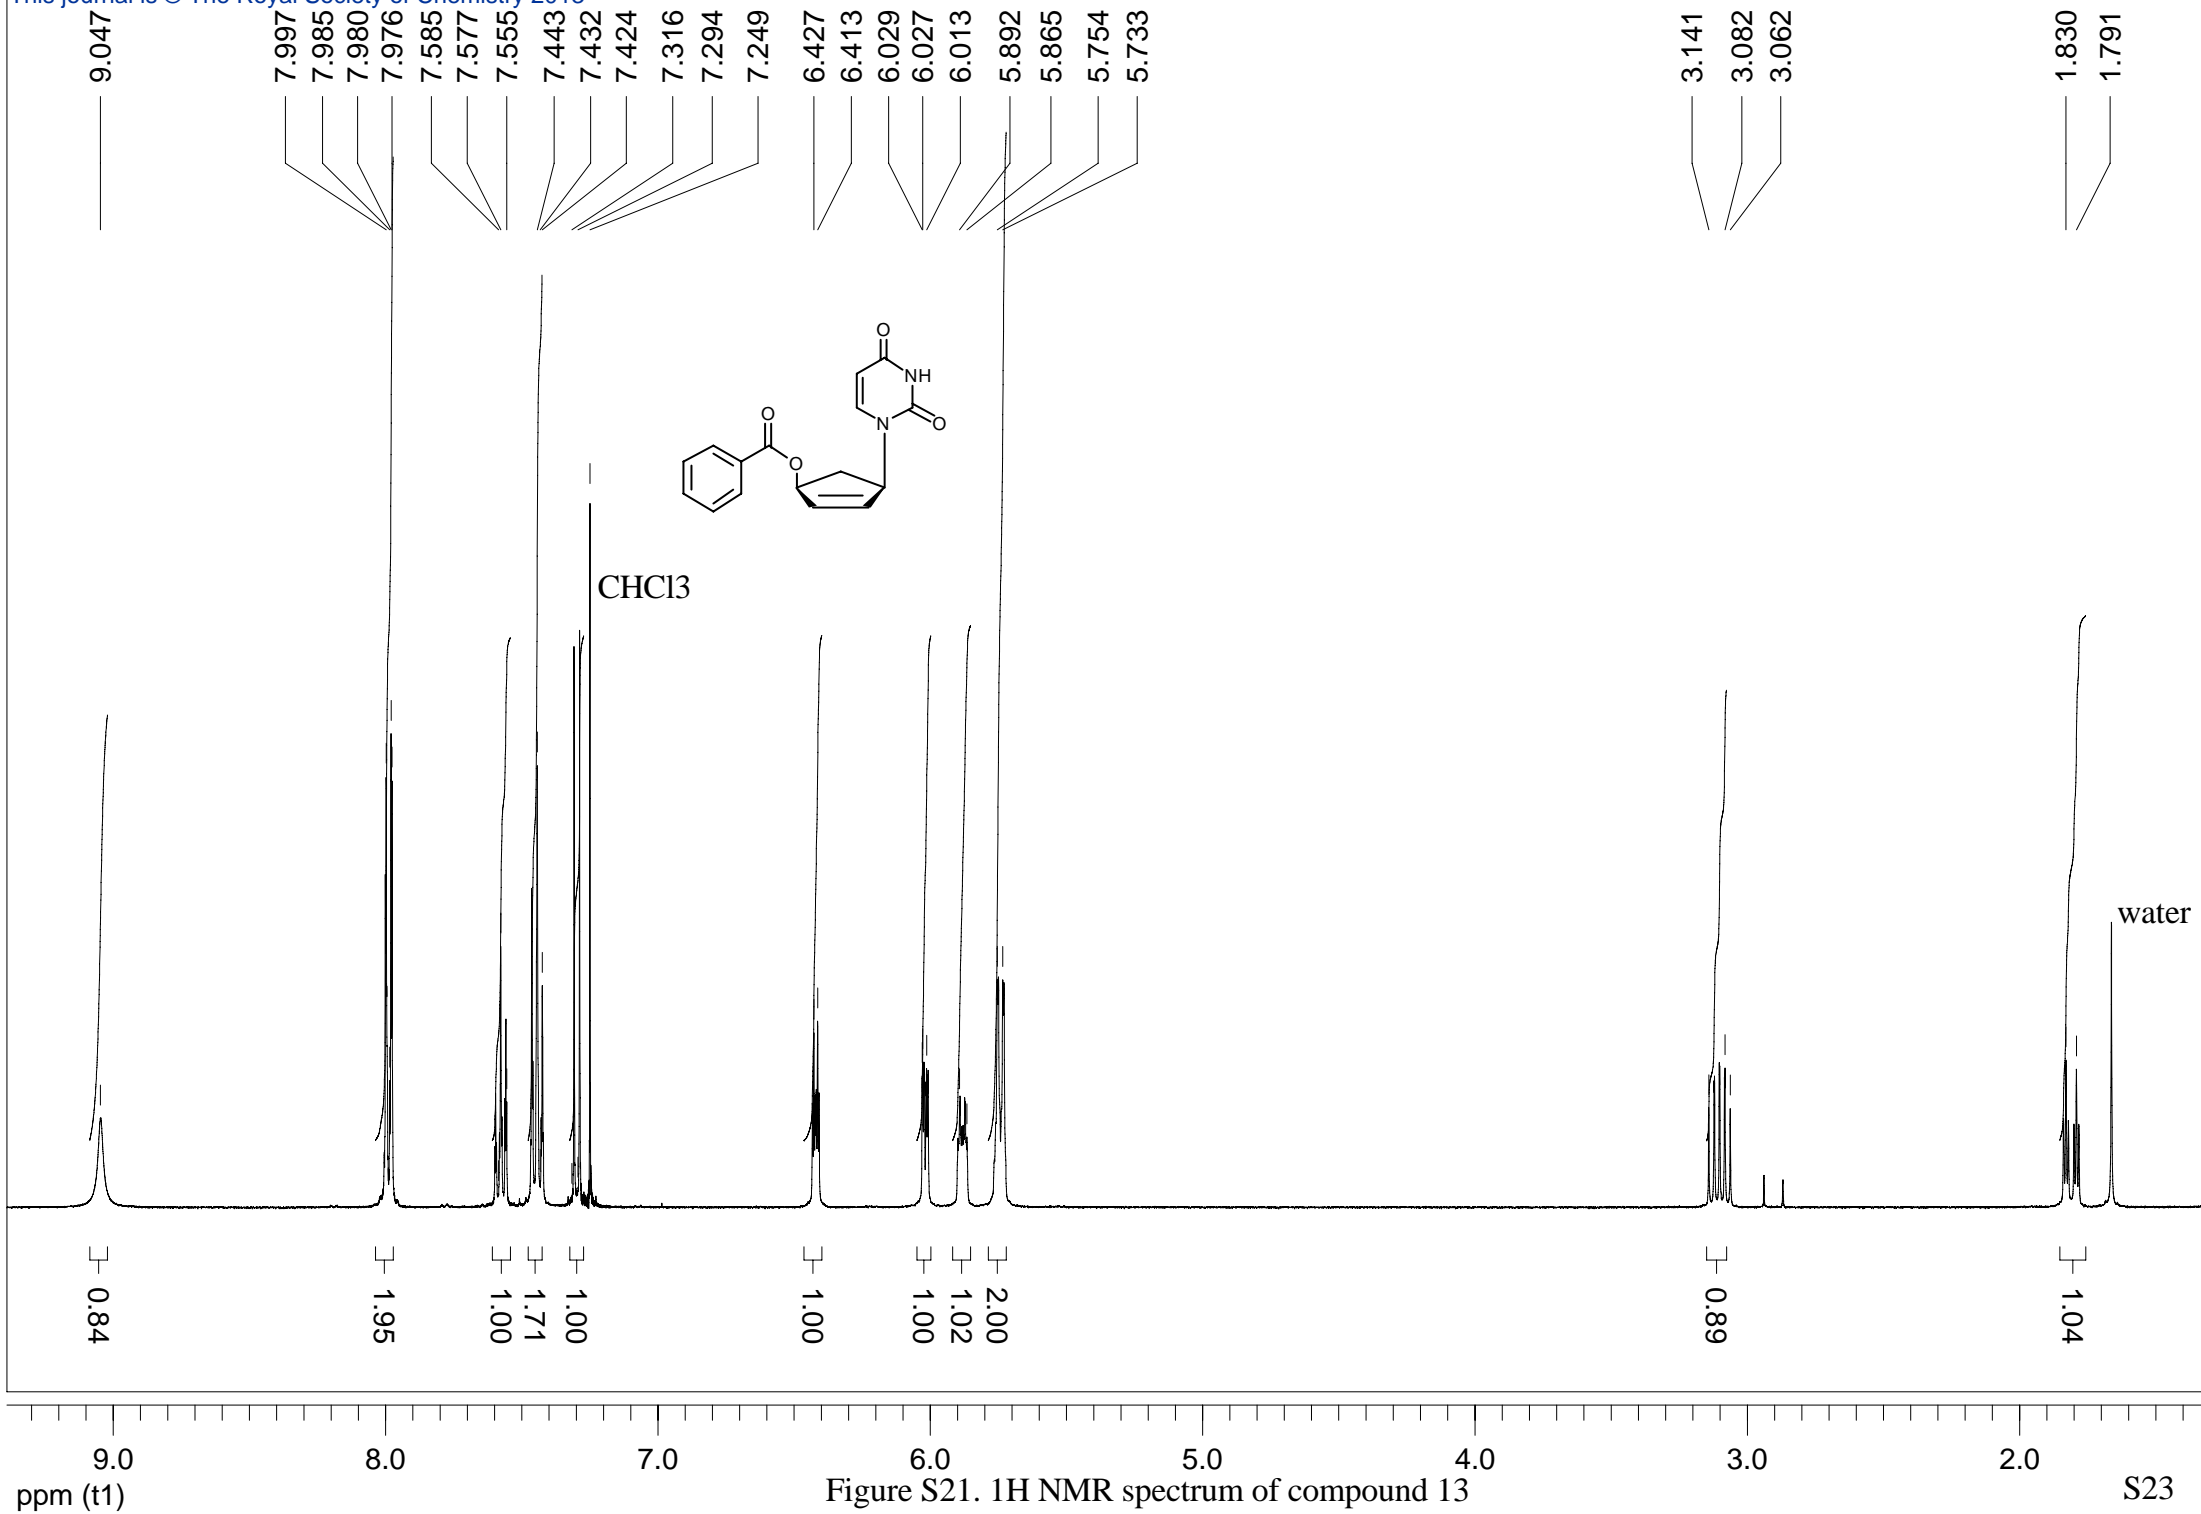

Figure S21. <sup>1</sup>H NMR spectrum of compound 13

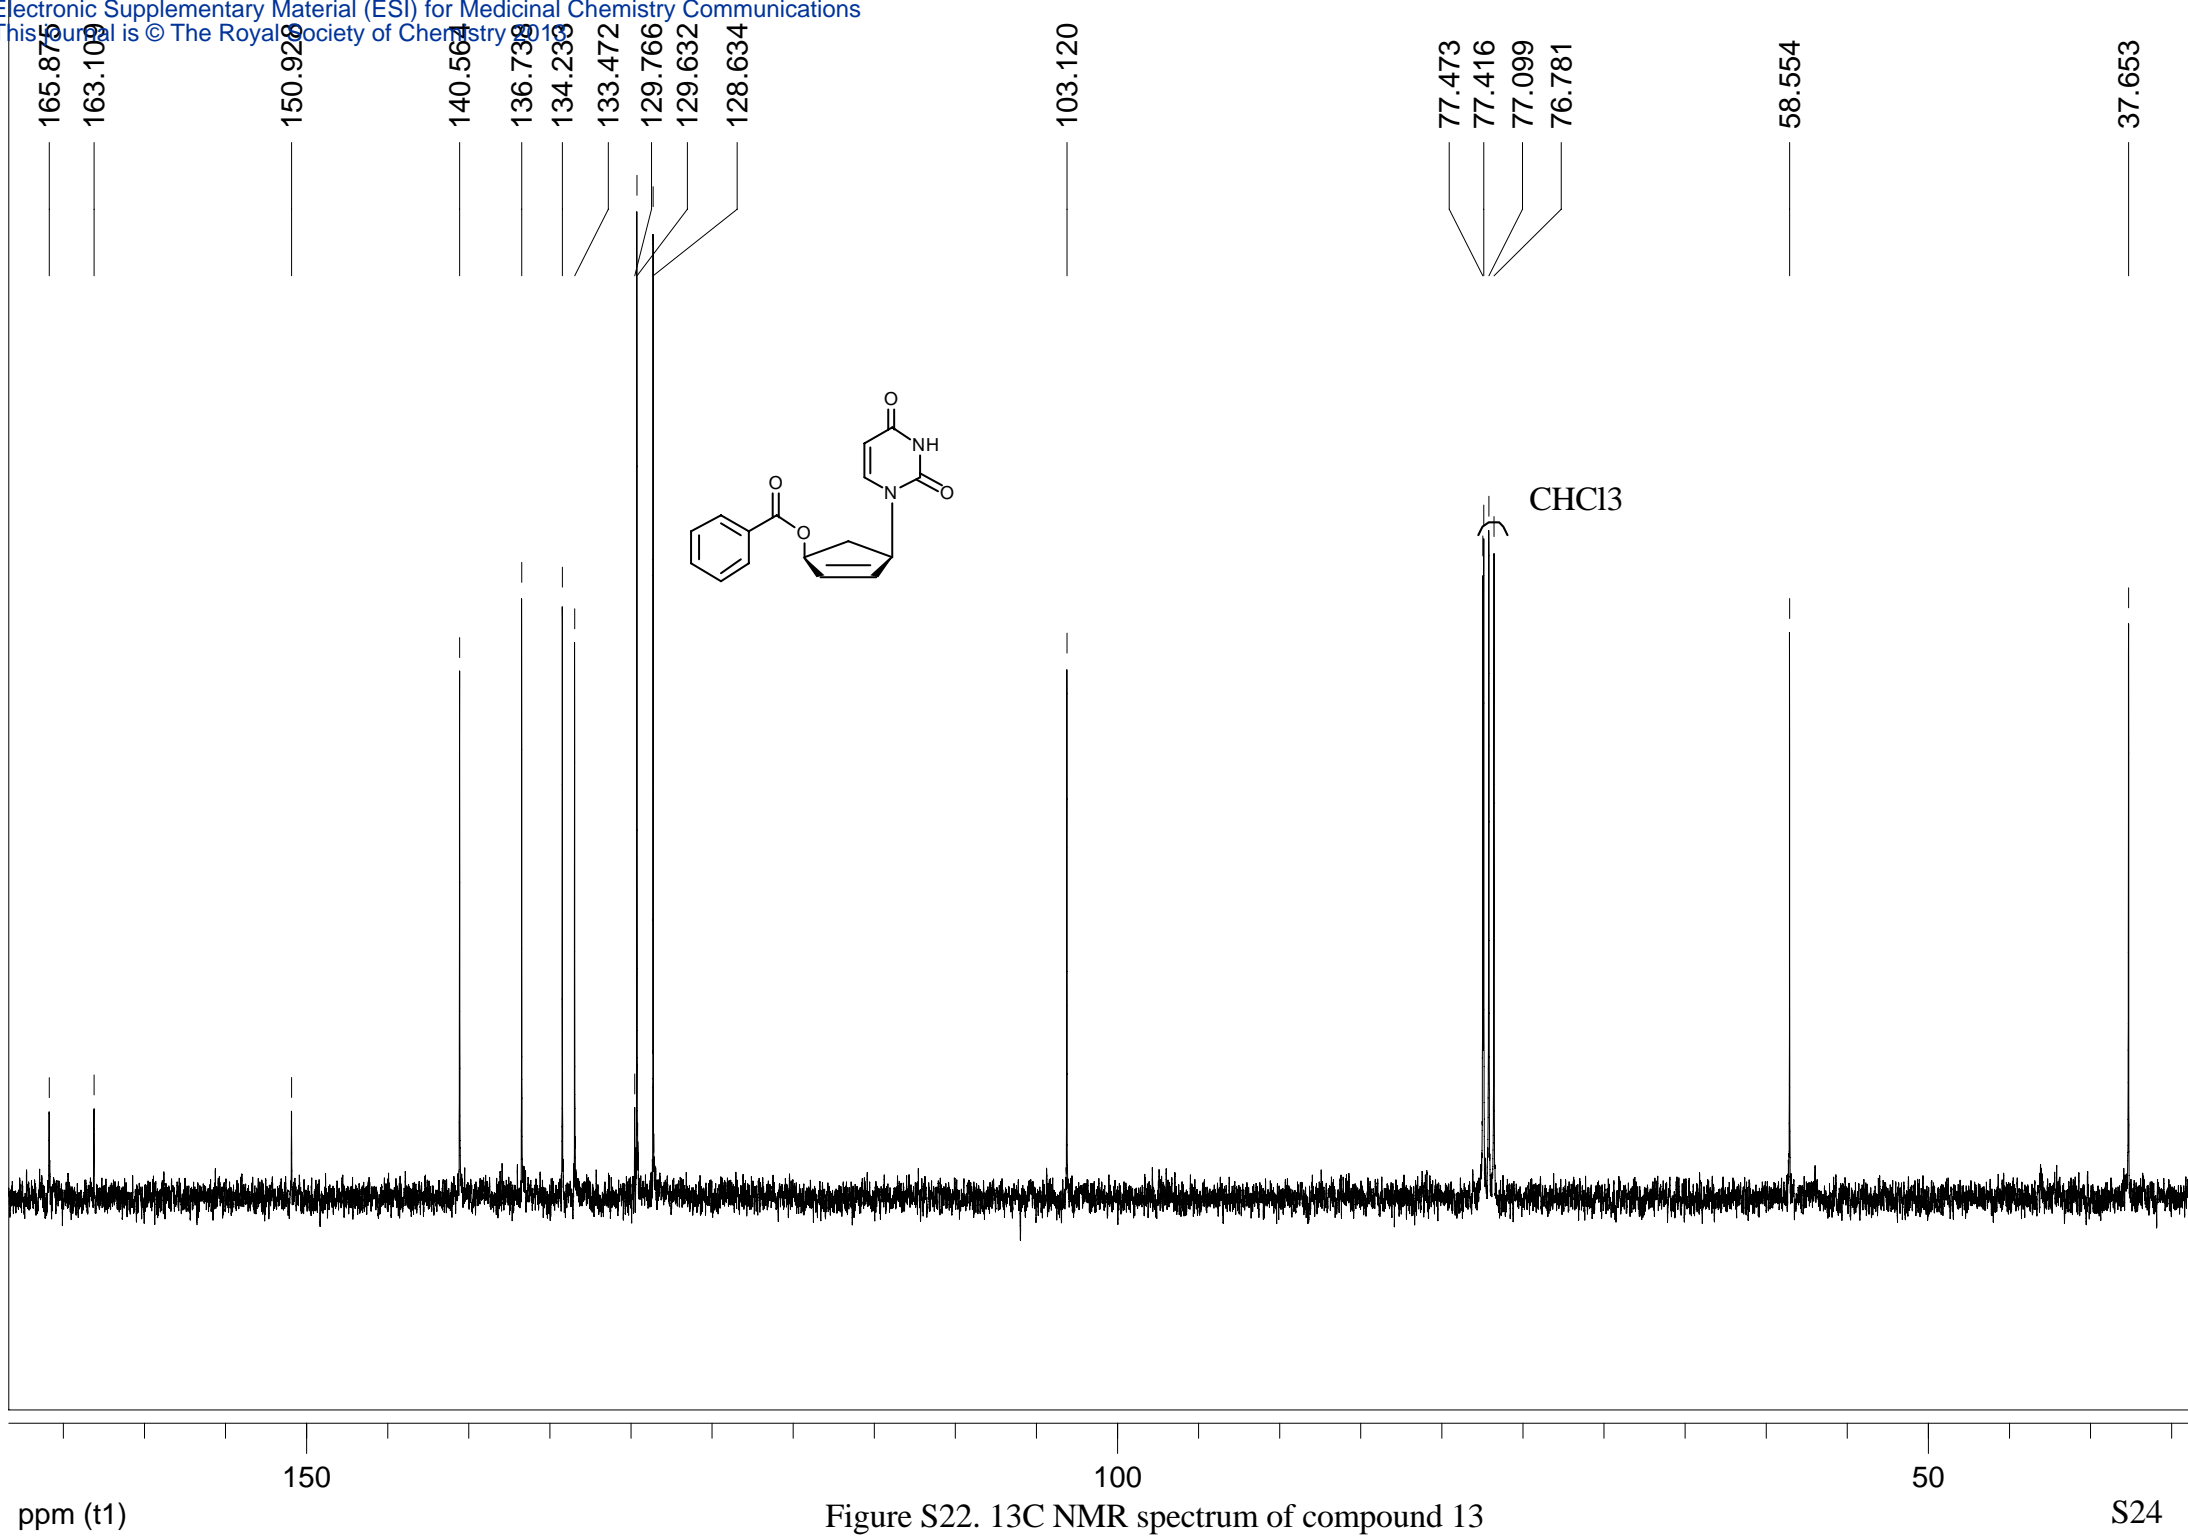

Figure S22. <sup>13</sup>C NMR spectrum of compound 13



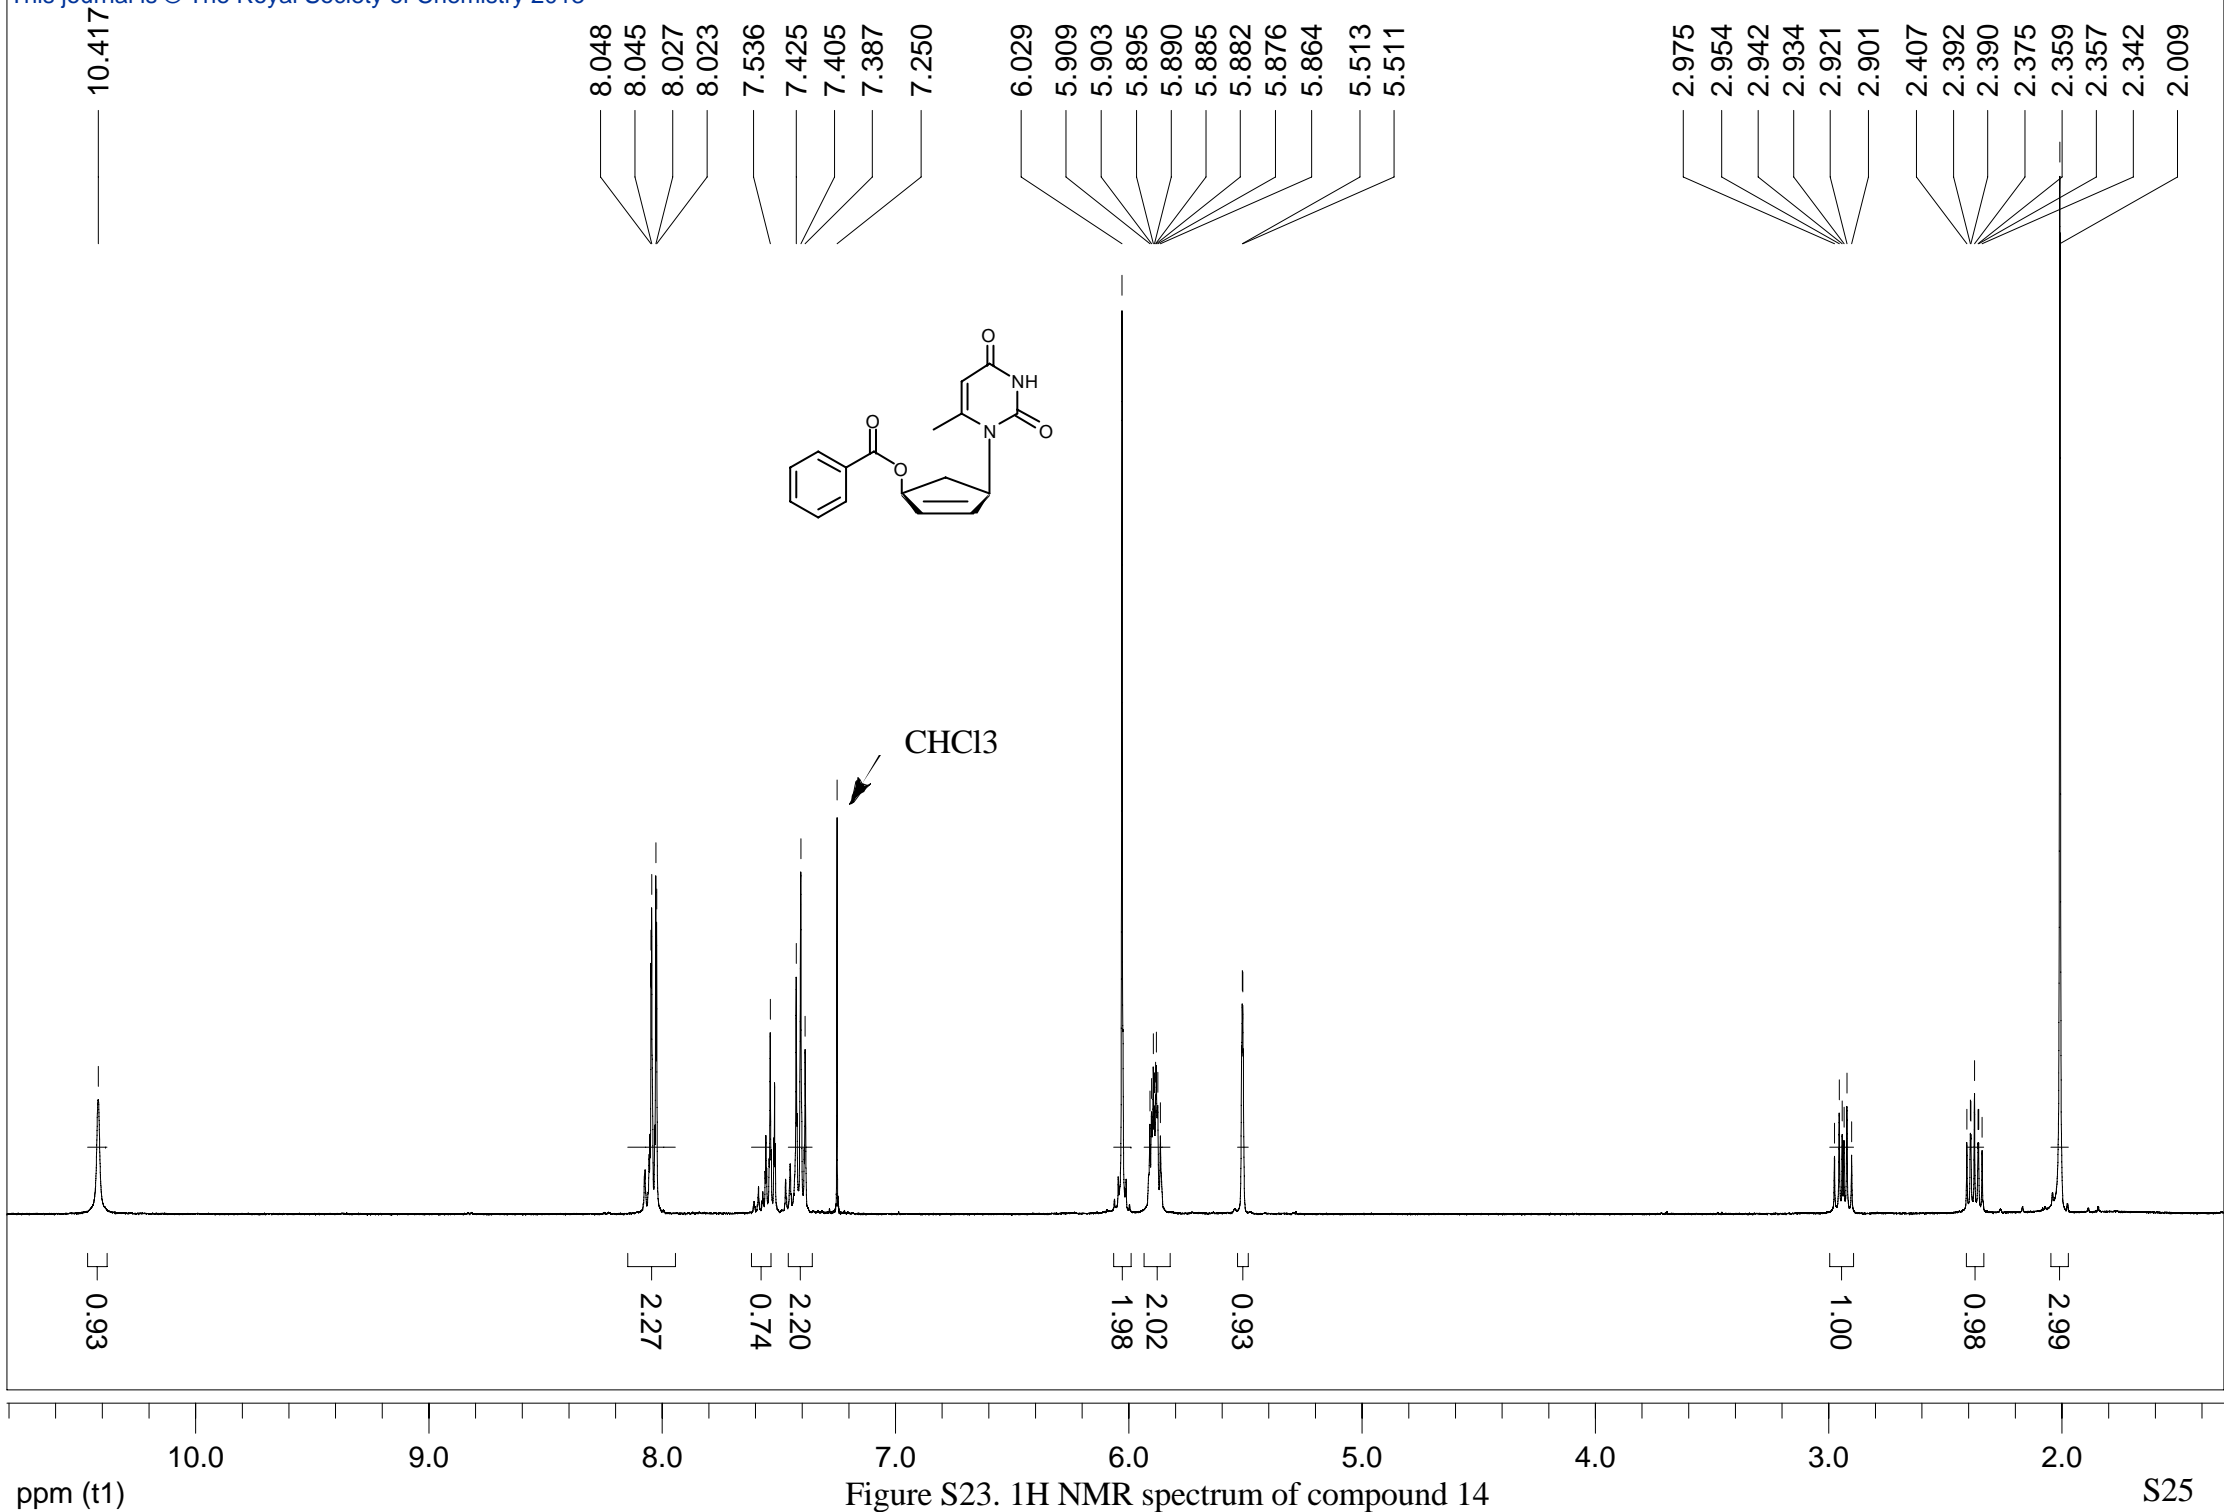

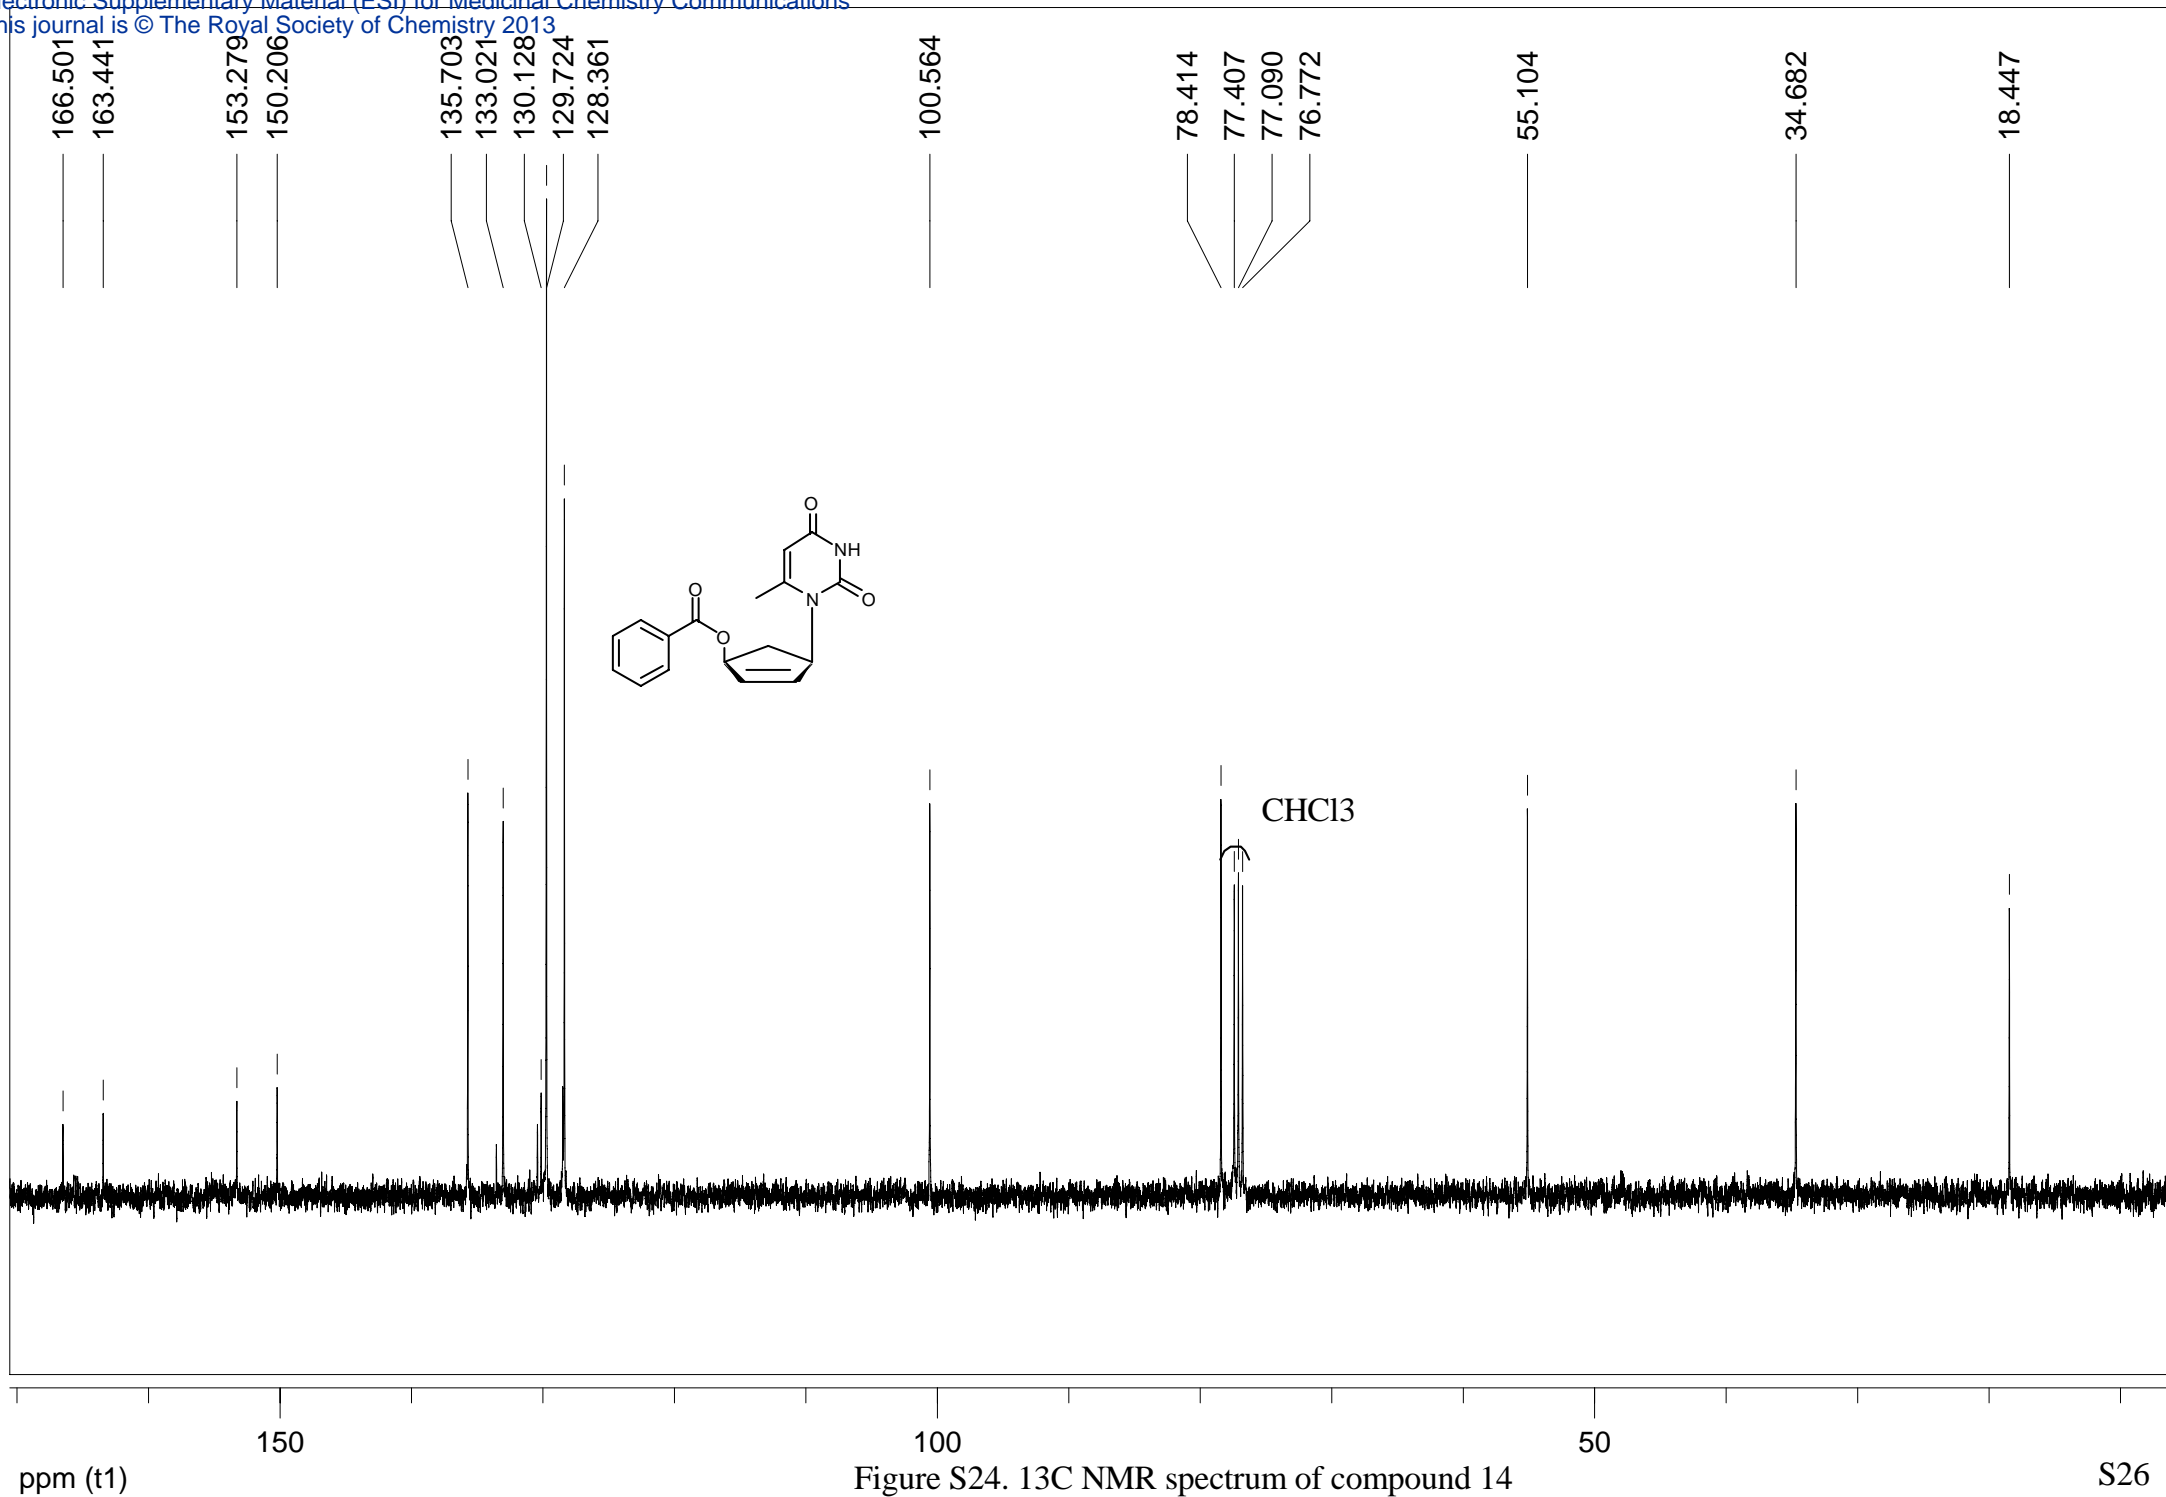

Figure S24. <sup>13</sup>C NMR spectrum of compound 14

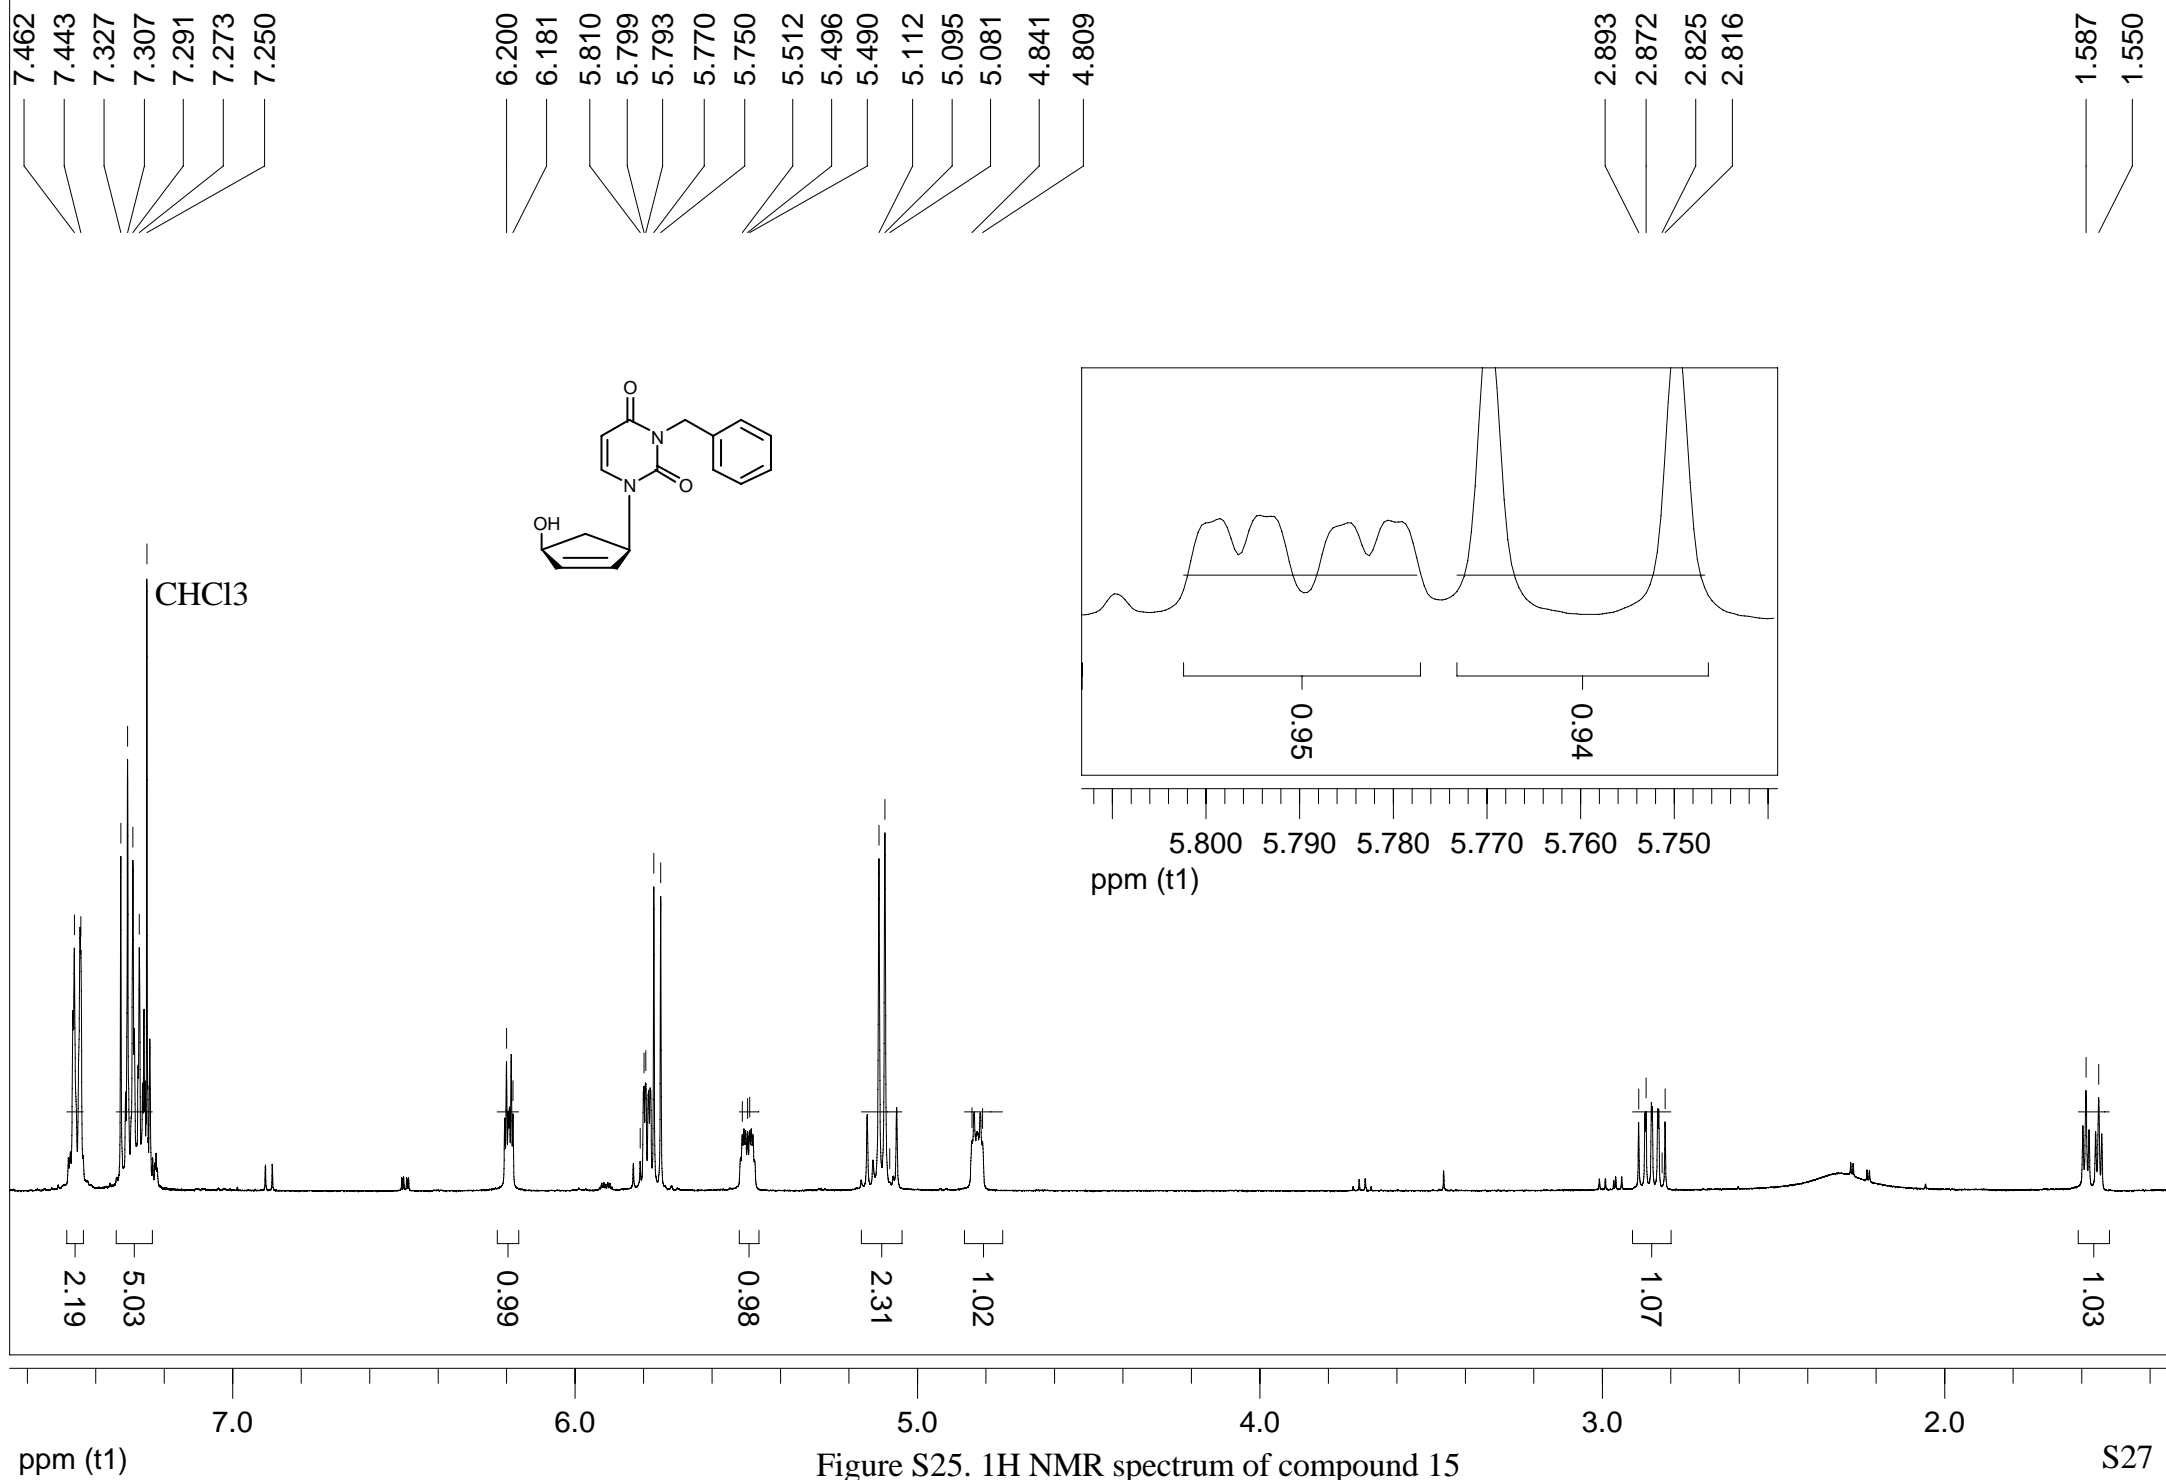

Figure S25. <sup>1</sup>H NMR spectrum of compound 15

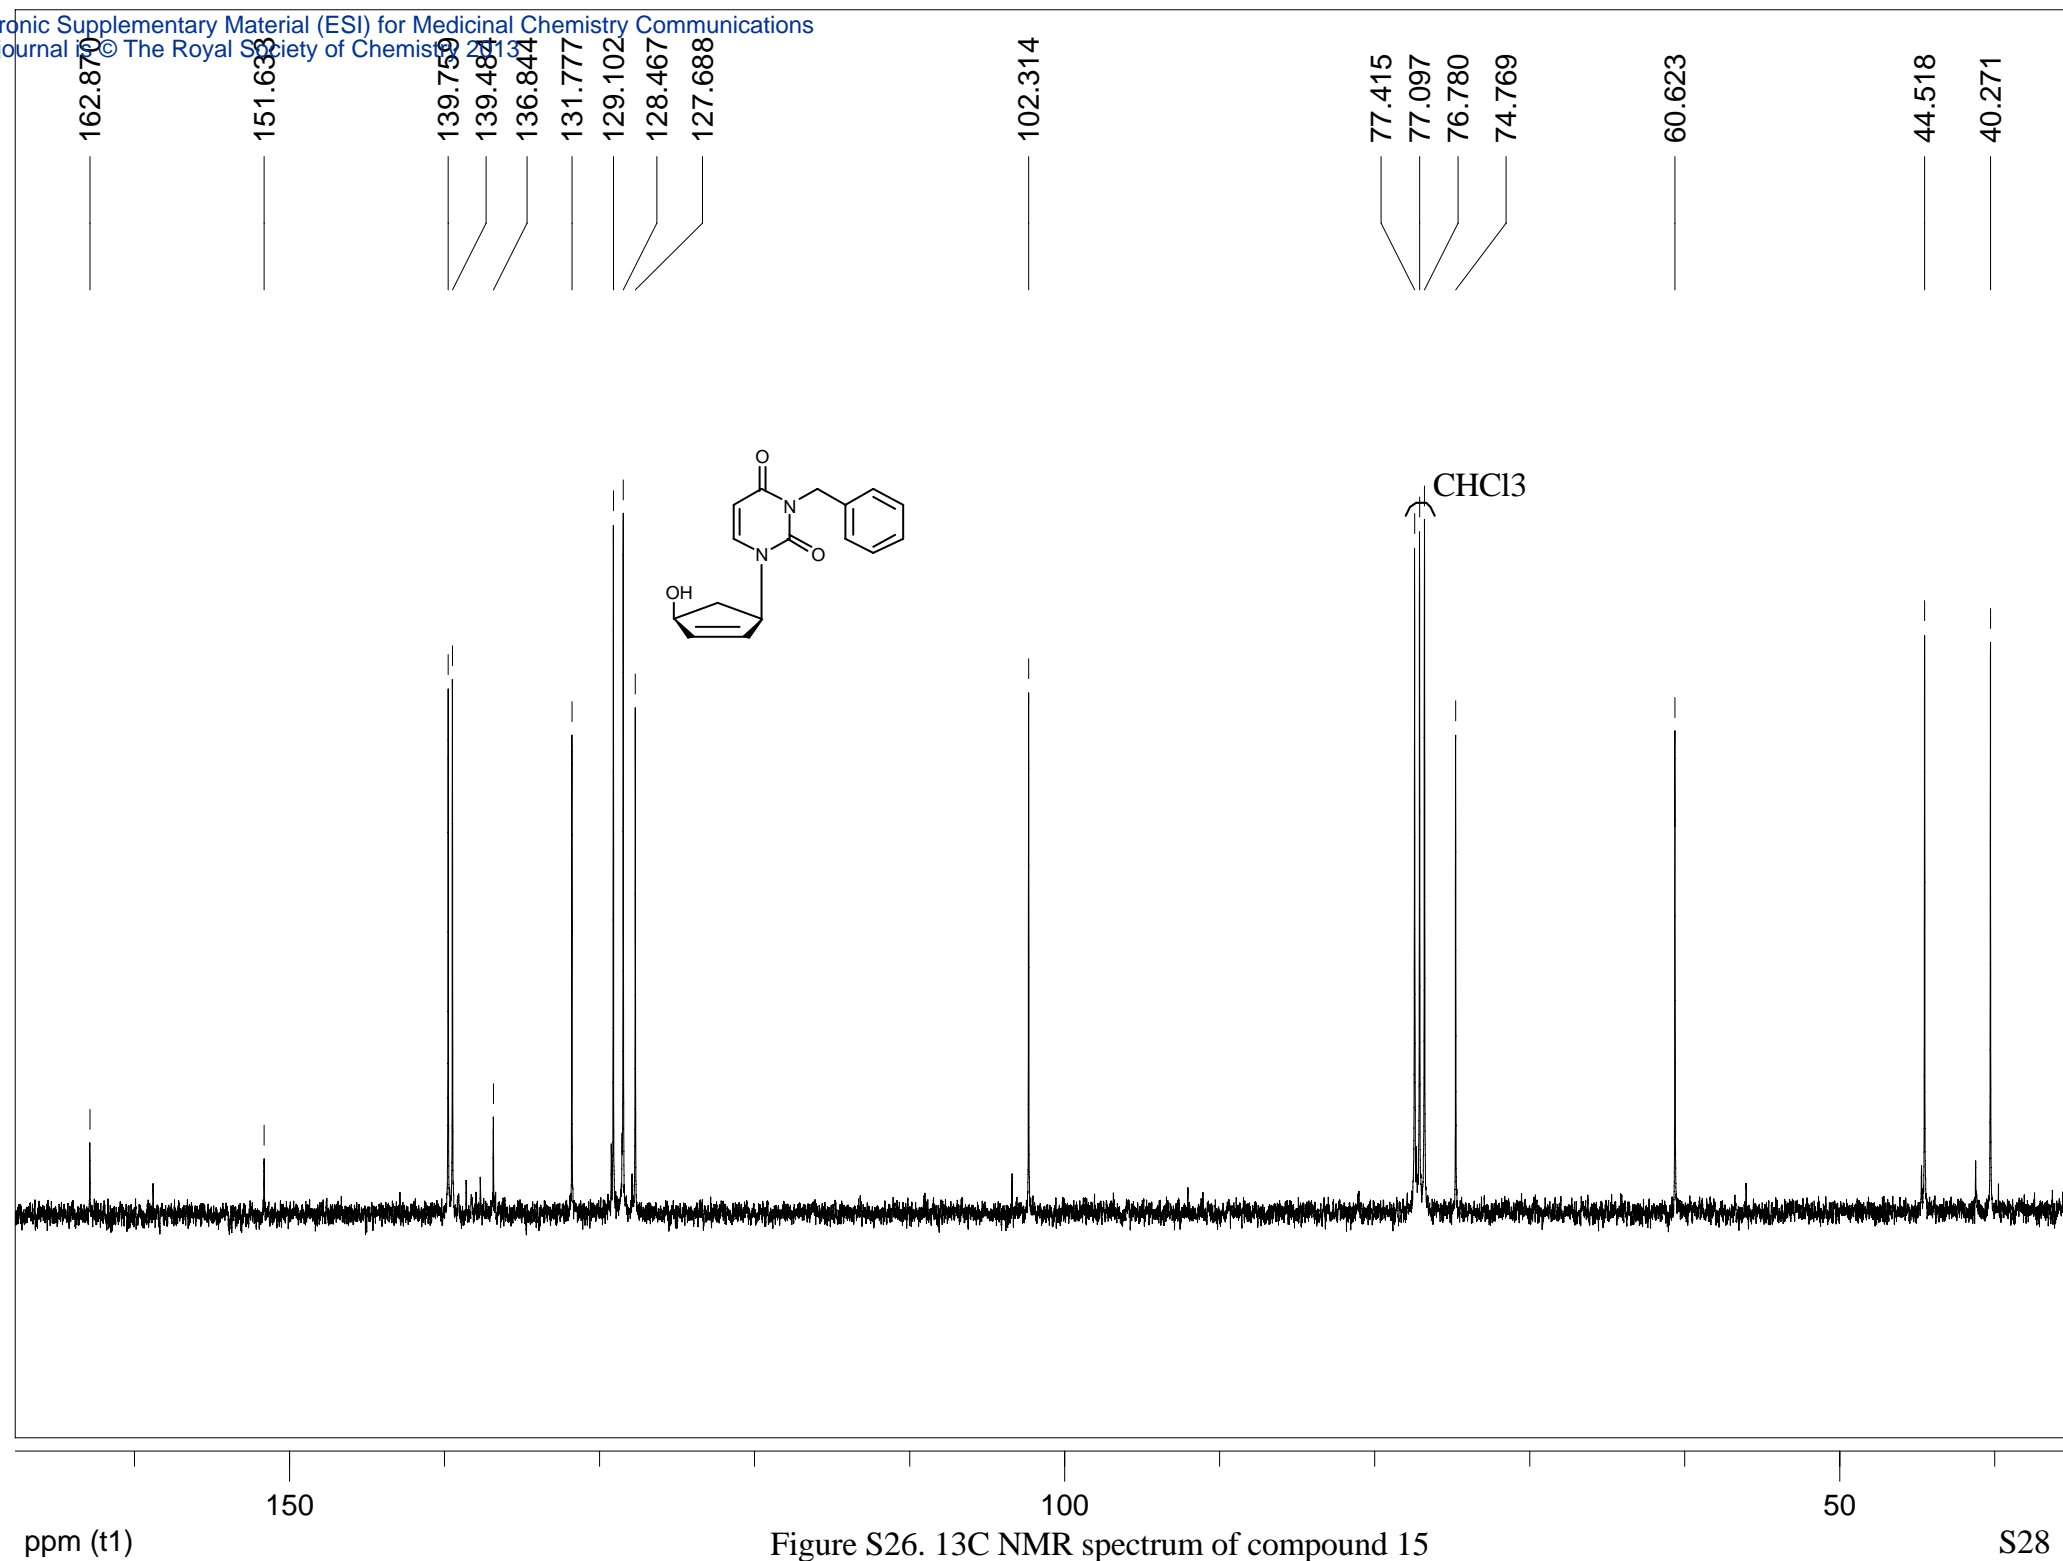

Supplement: c3md00036b.pdf [file c3md00036b.pdf]
